# Supplementary material for: Structure–Activity Relationship Studies of Chalcones and Diarylpentanoids with Antitumor Activity: Potency and Selectivity Optimization
Source: MDPI journal article supplement (doi:10.3390/ph16101354), 2023-09-25
Supplement: s1 [file s1]

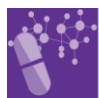

*Supporting Information*

# Structure-Activity Relationship Studies of Chalcones and Diarylpentanoids with Antitumor Activity: Potency and Selectivity Optimization

Joana Moreira <sup>1,2</sup>, Joana B. Loureiro <sup>3</sup>, Danilo Correia <sup>1</sup>, Andreia Palmeira <sup>1,2</sup>, Madalena M. Pinto <sup>1,2</sup>,  
Lucília Saraiva <sup>3,\*</sup>, and Honorina Cidade <sup>1,2,\*</sup>



## Table of Contents

|                                                                                   |    |
|-----------------------------------------------------------------------------------|----|
| List of Figures .....                                                             | 3  |
| Experimental description of compounds of group A1 (3, 5, 6, 8-11, and 13-16)..... | 5  |
| Experimental description of compounds of group A2 (1 and 25) .....                | 6  |
| Experimental description of compounds of group A3 (17-24).....                    | 7  |
| Experimental description of compounds of group B2 (28) .....                      | 8  |
| Experimental description of compounds of group C1 (32) .....                      | 9  |
| Experimental description of compounds of group C3 (37 and 39).....                | 9  |
| NMR spectra .....                                                                 | 10 |
| HRMS spectra.....                                                                 | 45 |
| HPLC chromatograms .....                                                          | 61 |



## List of Figures

|                                                                  |    |
|------------------------------------------------------------------|----|
| Figure S1. $^1\text{H}$ and $^{13}\text{C}$ NMR of compound 3.   | 10 |
| Figure S2. $^1\text{H}$ and $^{13}\text{C}$ NMR of compound 4.   | 11 |
| Figure S3. $^1\text{H}$ and $^{13}\text{C}$ NMR of compound 5.   | 12 |
| Figure S4. $^1\text{H}$ and $^{13}\text{C}$ NMR of compound 6.   | 13 |
| Figure S5. $^1\text{H}$ and $^{13}\text{C}$ NMR of compound 7.   | 14 |
| Figure S6. $^1\text{H}$ and $^{13}\text{C}$ NMR of compound 8.   | 15 |
| Figure S7. $^1\text{H}$ and $^{13}\text{C}$ NMR of compound 9.   | 16 |
| Figure S8. $^1\text{H}$ and $^{13}\text{C}$ NMR of compound 10.  | 17 |
| Figure S9. $^1\text{H}$ and $^{13}\text{C}$ NMR of compound 11.  | 18 |
| Figure S10. $^1\text{H}$ and $^{13}\text{C}$ NMR of compound 12. | 19 |
| Figure S11. $^1\text{H}$ and $^{13}\text{C}$ NMR of compound 13. | 20 |
| Figure S12. $^1\text{H}$ and $^{13}\text{C}$ NMR of compound 14. | 21 |
| Figure S13. $^1\text{H}$ and $^{13}\text{C}$ NMR of compound 15. | 22 |
| Figure S14. $^1\text{H}$ and $^{13}\text{C}$ NMR of compound 16. | 23 |
| Figure S15. $^1\text{H}$ and $^{13}\text{C}$ NMR of compound 17. | 24 |
| Figure S16. $^1\text{H}$ and $^{13}\text{C}$ NMR of compound 18. | 25 |
| Figure S17. $^1\text{H}$ and $^{13}\text{C}$ NMR of compound 19. | 26 |
| Figure S18. $^1\text{H}$ and $^{13}\text{C}$ NMR of compound 20. | 27 |
| Figure S19. $^1\text{H}$ and $^{13}\text{C}$ NMR of compound 21. | 28 |
| Figure S20. $^1\text{H}$ and $^{13}\text{C}$ NMR of compound 22. | 29 |
| Figure S21. $^1\text{H}$ and $^{13}\text{C}$ NMR of compound 23. | 30 |
| Figure S22. $^1\text{H}$ and $^{13}\text{C}$ NMR of compound 24. | 31 |
| Figure S23. $^1\text{H}$ and $^{13}\text{C}$ NMR of compound 26. | 32 |
| Figure S24. $^1\text{H}$ and $^{13}\text{C}$ NMR of compound 27. | 33 |
| Figure S25. $^1\text{H}$ and $^{13}\text{C}$ NMR of compound 28. | 34 |
| Figure S26. $^1\text{H}$ and $^{13}\text{C}$ NMR of compound 29. | 35 |
| Figure S27. $^1\text{H}$ and $^{13}\text{C}$ NMR of compound 30. | 36 |
| Figure S28. $^1\text{H}$ and $^{13}\text{C}$ NMR of compound 31. | 37 |
| Figure S29. $^1\text{H}$ and $^{13}\text{C}$ NMR of compound 32. | 38 |
| Figure S30. $^1\text{H}$ and $^{13}\text{C}$ NMR of compound 33. | 39 |
| Figure S31. $^1\text{H}$ and $^{13}\text{C}$ NMR of compound 34. | 40 |
| Figure S32. $^1\text{H}$ and $^{13}\text{C}$ NMR of compound 35. | 41 |
| Figure S33. $^1\text{H}$ and $^{13}\text{C}$ NMR of compound 36. | 42 |
| Figure S34. $^1\text{H}$ and $^{13}\text{C}$ NMR of compound 38. | 43 |
| Figure S35. $^1\text{H}$ and $^{13}\text{C}$ NMR of compound 40. | 44 |
| Figure S36. HRMS of compound 4.                                  | 45 |
| Figure S37. HRMS of compound 7.                                  | 46 |
| Figure S38. HRMS of compound 10.                                 | 47 |
| Figure S39. HRMS of compound 12.                                 | 48 |
| Figure S40. HRMS of compound 14.                                 | 49 |
| Figure S41. HRMS of compound 26.                                 | 50 |
| Figure S42. HRMS of compound 27.                                 | 51 |
| Figure S43. HRMS of compound 29.                                 | 52 |



|                                                    |    |
|----------------------------------------------------|----|
| Figure S44. HRMS of compound 30.....               | 53 |
| Figure S45. HRMS of compound 31.....               | 54 |
| Figure S46. HRMS of compound 33.....               | 55 |
| Figure S47. HRMS of compound 34.....               | 56 |
| Figure S48. HRMS of compound 35.....               | 57 |
| Figure S49. HRMS of compound 36.....               | 58 |
| Figure S50. HRMS of compound 38.....               | 59 |
| Figure S51. HRMS of compound 40.....               | 60 |
| Figure S52. HPLC chromatograms of compound 3.....  | 61 |
| Figure S53. HPLC chromatograms of compound 4.....  | 62 |
| Figure S54. HPLC chromatograms of compound 5.....  | 63 |
| Figure S55. HPLC chromatograms of compound 6.....  | 64 |
| Figure S56. HPLC chromatograms of compound 7.....  | 65 |
| Figure S57. HPLC chromatograms of compound 8.....  | 66 |
| Figure S58. HPLC chromatograms of compound 9.....  | 67 |
| Figure S59. HPLC chromatograms of compound 10..... | 68 |
| Figure S60. HPLC chromatograms of compound 11..... | 69 |
| Figure S61. HPLC chromatograms of compound 12..... | 70 |
| Figure S62. HPLC chromatograms of compound 13..... | 71 |
| Figure S63. HPLC chromatograms of compound 14..... | 72 |
| Figure S64. HPLC chromatograms of compound 15..... | 73 |
| Figure S65. HPLC chromatograms of compound 16..... | 74 |
| Figure S66. HPLC chromatograms of compound 17..... | 75 |
| Figure S67. HPLC chromatograms of compound 18..... | 76 |
| Figure S68. HPLC chromatograms of compound 19..... | 77 |
| Figure S69. HPLC chromatograms of compound 20..... | 78 |
| Figure S70. HPLC chromatograms of compound 21..... | 79 |
| Figure S71. HPLC chromatograms of compound 22..... | 80 |
| Figure S72. HPLC chromatograms of compound 23..... | 81 |
| Figure S73. HPLC chromatograms of compound 24..... | 82 |
| Figure S74. HPLC chromatograms of compound 26..... | 83 |
| Figure S75. HPLC chromatograms of compound 27..... | 84 |
| Figure S76. HPLC chromatograms of compound 28..... | 85 |
| Figure S77. HPLC chromatograms of compound 29..... | 86 |
| Figure S78. HPLC chromatograms of compound 30..... | 87 |
| Figure S79. HPLC chromatograms of compound 31..... | 88 |
| Figure S80. HPLC chromatograms of compound 32..... | 89 |
| Figure S81. HPLC chromatograms of compound 33..... | 90 |
| Figure S82. HPLC chromatograms of compound 34..... | 91 |
| Figure S83. HPLC chromatograms of compound 35..... | 92 |
| Figure S84. HPLC chromatograms of compound 36..... | 93 |
| Figure S85. HPLC chromatograms of compound 38..... | 94 |
| Figure S86. HPLC chromatograms of compound 40..... | 95 |



**Experimental description of compounds of group A1 (3, 5, 6, 8-11, and 13-16)**

**(E)-2-(3,4,5-trimethoxybenzylidene)-2,3-dihydro-1H-inden-1-one (3):** Purified by crystallization from methanol. Yield: 80% as white solid; 99.9% purity; **mp** 160-163 °C (methanol); **<sup>1</sup>H NMR** (CDCl<sub>3</sub>, 300.13 MHz)  $\delta$ : 7.91 (d,  $J$  = 7.7 Hz, 1H, H-7), 7.62 (td,  $J$  = 7.2; 1.3 Hz, 1H, H-5), 7.59 (sl, 1H, H-1''), 7.57 (brd,  $J$  = 6.6 Hz, 1H, H-4), 7.43 (brt,  $J$  = 7.3 Hz, 1H, H-6), 6.91 (s, 2H, H-2', -6'), 4.04 (sl, 2H, H-3), 3.94 (s, 6H, 3', 5'-OCH<sub>3</sub>), 3.92 (s, 3H, 4'-OCH<sub>3</sub>) ppm; **<sup>13</sup>C NMR** (CDCl<sub>3</sub>, 75.47 MHz)  $\delta$ : 194.3 (C=O), 153.5 (C-3', -5'), 149.5 (C-9), 139.9 (C-4'), 138.2 (C-8), 134.7 (C-1''), 134.3 (C-5), 133.9 (C-2), 127.9 (C-6), 126.3 (C-4), 124.6 (C-7), 131.0 (C-1'), 108.3 (C-2', -6'), 61.2 (4'-OCH<sub>3</sub>), 56.4 (3', 5'-OCH<sub>3</sub>), 32.4 (C-3) ppm.

**(E)-2-(3,4,5-trimethoxybenzylidene)-5,6-dimethoxy-2,3-dihydro-1H-inden-1-one (5):** Purified by crystallization from methanol. Yield: 85% as white solid; 99.7% purity; **mp** 156-159 °C (methanol); **<sup>1</sup>H NMR** (CDCl<sub>3</sub>, 300.13 MHz)  $\delta$ : 7.50 (sl, 1H, H-1''), 7.33 (s, 1H, H-7), 7.00 (s, 1H, H-4), 6.88 (s, 2H, H-2', -6'), 3.99 (s, 3H, 6-OCH<sub>3</sub>), 3.96 (sl, 2H, H-3), 3.94 (s, 3H, 4'-OCH<sub>3</sub>), 3.93 (s, 6H, 3', 5'-OCH<sub>3</sub>), 3.90 (s, 3H, 5-OCH<sub>3</sub>) ppm; **<sup>13</sup>C NMR** (CDCl<sub>3</sub>, 75.47 MHz)  $\delta$ : 193.2 (C=O), 155.5 (C-6), 153.5 (C-3', -5'), 149.8 (C-5), 144.7 (C-9), 139.6 (C-4'), 134.6 (C-2), 132.7 (C-1''), 131.2 (C-8, -1'), 108.0 (C-2', -6'), 107.3 (C-4), 105.2 (C-7), 61.1 (4'-OCH<sub>3</sub>), 56.4 (6-OCH<sub>3</sub>), 56.3 (5-, 3', 5'-OCH<sub>3</sub>), 32.1 (C-3) ppm.

**(E)-2-(4-chlorobenzylidene)-2,3-dihydro-1H-inden-1-one (6):** Purified by crystallization from methanol. Yield: 71% as yellow solid; 99.8% purity; **mp** 179-181 °C (methanol); **<sup>1</sup>H NMR** (CDCl<sub>3</sub>, 300.13 MHz)  $\delta$ : 7.91 (dd,  $J$  = 7.7; 1.9 Hz, 1H, H-7), 7.66-7.59 (m, 4H, H-5, -2', -6', H-1''), 7.56 (dt,  $J$  = 7.6; 1.2 Hz, 1H, H-4), 7.45-7.42 (m, 3H, H-3', -5', -6), 4.02 (d,  $J$  = 2.1 Hz, 2H, H-3) ppm; **<sup>13</sup>C NMR** (CDCl<sub>3</sub>, 75.47 MHz)  $\delta$ : 194.3 (C=O), 149.6 (C-9), 138.0 (C-8), 135.8 (C-4'), 135.3 (C-2), 134.9 (C-5), 134.0 (C-1''), 132.6 (C-1'), 132.0 (C-2', -6'), 129.4 (C-3', -5'), 127.6 (C-6), 126.3 (C-4), 124.7 (C-7), 32.8 (C-3) ppm.

**(E)-2-(4-chlorobenzylidene)-5,6-dimethoxy-2,3-dihydro-1H-inden-1-one (8):** Purified by crystallization from methanol. Yield: 47% as light-yellow solid; 99.8% purity; **mp** 188-190 °C (methanol); **<sup>1</sup>H NMR** (CDCl<sub>3</sub>, 300.13 MHz)  $\delta$ : 7.58 (d,  $J$  = 7.7 Hz, 2H, H-2', -6'), 7.53 (sl, 1H, H-1''), 7.41 (d,  $J$  = 7.6 Hz, 2H, H-3', -5'), 7.33 (s, 1H, H-7), 6.98 (s, 1H, H-4), 4.00 (s, 3H, 5-OCH<sub>3</sub>), 3.93 (sl, 2H, H-3), 3.95 (s, 3H, 6-OCH<sub>3</sub>) ppm; **<sup>13</sup>C NMR** (CDCl<sub>3</sub>, 75.47 MHz)  $\delta$ : 193.0 (C=O), 155.7 (C-5), 149.9 (C-6), 144.9 (C-9), 136.0 (C-2), 135.1 (C-4'), 134.2 (C-1'), 131.7 (C-2', -6'), 131.1 (C-1''), 129.3 (C-3', -5'), 124.6 (C-9), 107.3 (C-5), 105.2 (C-7), 56.5 (5-, 6-OCH<sub>3</sub>), 32.2 (C-3) ppm.

**(E)-2-(3,4,5-trimethoxybenzylidene)-3,4-dihydronaphthalen-1(2H)-one (9):** Purified by crystallization from methanol. Yield: 76% as light-yellow solid; 100% purity; **mp** 116-118 °C (methanol); **<sup>1</sup>H NMR** (CDCl<sub>3</sub>, 300.13 MHz)  $\delta$ : 8.12 (dd,  $J$  = 7.8; 2.0 Hz, 1H, H-8), 7.81 (sl, 1H, H-1''), 7.49 (td,  $J$  = 7.5; 1.6 Hz, 1H, H-6), 7.37 (dd,  $J$  = 7.6; 1.3 Hz, H-7), 6.68 (s, 2H, H-2', -6'), 3.90 (s, 3H, 4'-OCH<sub>3</sub>), 3.89 (s, 6H, 3', 5'-OCH<sub>3</sub>), 3.19 (td,  $J$  = 6.5; 1.8 Hz, 2H, H-3), 2.97 (t,  $J$  = 6.5 Hz, 2H, H-4) ppm; **<sup>13</sup>C NMR** (CDCl<sub>3</sub>, 75.47 MHz)  $\delta$ : 187.9 (C=O), 153.2 (C-3', -5'), 143.2 (C-10), 138.7 (C-4'), 137.0 (C-1''), 135.0 (C-2), 133.4 (C-6), 133.6 (C-9), 131.6 (C-1'), 107.4 (C-2', -6'), 128.3 (C-5), 128.2 (C-8), 127.2 (C-7), 61.1 (4'-OCH<sub>3</sub>), 56.3 (3', 5'-OCH<sub>3</sub>), 29.0 (C-4), 27.5 (C-3) ppm.

**(E)-3-(3,4,5-trimethoxybenzylidene)chroman-4-one (11):** Purified by HPLC (column ACE - C18 (150 × 4.6 mm I.D., particle size 5  $\mu$ m), acetonitrile : water (70:30)). Yield: 30% as light-yellow solid; 99.7% purity; **mp** 109-111 °C (acetonitrile); **<sup>1</sup>H NMR** (CDCl<sub>3</sub>, 300.13 MHz)  $\delta$ : 8.02 (dd,  $J$  = 7.9; 1.7 Hz, 1H, H-8), 7.81 (sl, 1H, H-1''), 7.53-7.43 (m, 1H, H-6), 7.11-7.04 (m, 1H, H-7), 6.97 (dd,  $J$  = 8.3; 1.1 Hz, 1H, H-5), 6.53 (s, 2H, H-2', -6'), 5.39 (d,  $J$  = 1.9 Hz, 2H, H-4), 3.90 (s, 3H, 4'-OCH<sub>3</sub>), 3.89 (s, 6H, 3', 5'-OCH<sub>3</sub>) ppm; **<sup>13</sup>C NMR** (CDCl<sub>3</sub>, 75.47 MHz)  $\delta$ : 182.2 (C=O), 161.2 (C-10), 153.4 (C-3', -5'), 139.5 (C-4'), 137.8 (C-1''), 136.0 (C-6), 130.4 (C-2), 130.0



(C-1'), 128.1 (C-8), 122.1 (C-7), 121.5 (C-9), 107.6 (C-2', -6'), 118.0 (C-5), 61.2 (4'-OCH<sub>3</sub>). 56.4 (3', 5'-OCH<sub>3</sub>), 67.8 (C-3) ppm.

**(E)-2-(4-chlorobenzylidene)-3,4-dihydronaphthalen-1(2H)-one (13):** Purified by crystallization from methanol. Yield: 59% as yellow solid; 99.9% purity; **mp** 134–136 °C (methanol); **<sup>1</sup>H NMR** (CDCl<sub>3</sub>, 300.13 MHz)  $\delta$ : 8.13 (dd,  $J$  = 7.8; 2.0 Hz, 1H, H-8), 7.80 (t,  $J$  = 1.8 Hz, 1H, H-1'), 7.50 (td,  $J$  = 7.5; 2.5 Hz, 1H, H-6), 7.42–7.35 (m, 5H, H-2', -3', -5', -6', -7), 7.25 (dd,  $J$  = 7.5; 2.0 Hz, H-5), 3.13–3.08 (m, 2H, H-3), 2.95 (t,  $J$  = 6.4 Hz, 2H, H-4) ppm; **<sup>13</sup>C NMR** (CDCl<sub>3</sub>, 75.47 MHz)  $\delta$ : 187.8 (C=O), 143.3 (C-10), 136.0 (C-2), 135.4 (C-1'), 134.6 (C-4'), 134.4 (C-1'), 133.6 (C-6), 133.5 (C-9), 131.3 (C-2', -6'), 128.9 (C-3', -5'), 128.4 (C-8), 128.3 (C-5), 127.2 (C-7), 28.9 (C-4), 27.3 (C-3) ppm.

**(E)-3-(4-chlorobenzylidene)chroman-4-one (15):** Purified by TLC (n-hexane: ethyl acetate, 7:3); Yield: 59% as light-yellow solid; 99.9% purity; **mp** 128–129 °C (methanol); **<sup>1</sup>H NMR** (CDCl<sub>3</sub>, 300.13 MHz)  $\delta$ : 8.02 (dd,  $J$  = 7.8; 2.0 Hz, H-8), 7.81 (sl, 1H, H-1'), 7.50 (td,  $J$  = 7.7; 2.4 Hz, H-6), 7.43 (d,  $J$  = 8.5 Hz, 2H, H-3', -5'), 7.25 (d,  $J$  = 8.4 Hz, 2H, H-2', -6'), 7.08 (t,  $J$  = 7.5 Hz, 1H, H-7), 6.97 (d,  $J$  = 8.3 Hz, 1H, H-5), 5.31 (d,  $J$  = 1.9 Hz, 2H, H-3) ppm; **<sup>13</sup>C NMR** (CDCl<sub>3</sub>, 75.47 MHz)  $\delta$ : 182.1 (C=O), 161.1 (C-10), 136.2 (C-6, -1'), 135.7 (C-4'), 132.9 (C-1'), 131.5 (C-2'), 131.3 (C-2', -6'), 129.2 (C-3', -5'), 128.1 (C-8), 122.2 (C-7), 122.0 (C-9), 118.1 (C-5), 67.1 (C-3) ppm.

**(Z)-3-(4-chlorobenzylidene)thiochroman-4-one (16):** Purified by crystallization from methanol. Yield: 23% as yellow solid; 99.9% purity; **mp** 139–141 °C (methanol); **<sup>1</sup>H NMR** (CDCl<sub>3</sub>, 300.13 MHz)  $\delta$ : 8.19 (dd,  $J$  = 7.9; 2.0 Hz, 1H, H-8), 7.70 (s, 1H, H-1'), 7.44–7.38 (m, 3H, H-3', -5', -6), 7.35–7.32 (m, 2H, H-2', -6'), 7.29 (dd,  $J$  = 8.3; 1.4 Hz, 1H, H-5), 7.25 (dd,  $J$  = 7.1; 1.9 Hz, 1H, H-7), 4.07 (d,  $J$  = 1.2 Hz, 2H, H-3) ppm; **<sup>13</sup>C NMR** (CDCl<sub>3</sub>, 75.47 MHz)  $\delta$ : 185.8 (C=O), 141.1 (C-10), 136.3 (C-1'), 135.1 (C-1'), 133.6 (C-6), 133.3 (C-2, -4'), 132.4 (C-9), 130.9 (C-2', -6'), 130.5 (C-8), 129.2 (C-3', -5'), 128.0 (C-5), 126.0 (C-7), 29.3 (C-3) ppm.

## Experimental description of compounds of group A2 (1 and 25)

### Synthesis of 1-(2-hydroxy-4-methoxy-3-propylphenyl) ethan-1-one (25)

To a solution of 1-(2,4-dihydroxy-3-propylphenyl)ethan-1-one (5g, 0.026 mol, 1 eq.) in anhydrous acetone (100 ml) was added potassium carbonate (10.8 g, 0.078 mol, 1.6 eq.). Dimethyl sulfate (3.90 ml) was added dropwise, and the mixture was allowed to stir for 2 h at reflux and under nitrogen atmosphere. The reaction was quenched by the addition of ice and acetone was evaporated. After, an aqueous solution of 1M HCl was added until pH 2–3 and the solution was extracted with ethyl acetate (3x100 ml). The organic phases were washed with brine (2x50 ml), dried over with anhydrous sodium sulfate, and purified by crystallization with ethyl acetate. A white solid (90% yield) corresponding to 1-(2-hydroxy-4-methoxy-3-propylphenyl)ethan-1-one (**25**) was obtained.

**1-(2-hydroxy-4-methoxy-3-propylphenyl)ethan-1-one (25)** **<sup>1</sup>H NMR** (CDCl<sub>3</sub>, 300.13 MHz)  $\delta$ : 12.73 (s, 1H, 2-OH), 7.60 (d,  $J$  = 8.9 Hz, 1H, H-6), 6.45 (d,  $J$  = 8.9 Hz, 1H, H-5), 3.88 (s, 3H, 4-OCH<sub>3</sub>), 2.62 (t,  $J$  = 6.0 Hz, 2H, H-1'), 2.57 (s, 3H, 1-COCH<sub>3</sub>), 1.56–1.46 (m, 2H, H-2'), 0.94 (t,  $J$  = 7.4 Hz, 3H, H-3') ppm; **<sup>13</sup>C NMR** (CDCl<sub>3</sub>, 75.47 MHz)  $\delta$ : 202.9 (1-COCH<sub>3</sub>), 163.5 (C-2), 162.0 (C-4), 130.0 (C-6), 118.3 (C-1), 114.2 (C-3), 101.9 (C-5), 55.7 (4-OCH<sub>3</sub>), 26.3 (1-COCH<sub>3</sub>), 24.3 (C-1'), 21.9 (C-2'), 14.2 (C-3').

### Synthesis of (E)-3-(3,4,5-trimethoxy-chlorophenyl)-1-(2-hydroxy-4-methoxy-3-propylphenyl)prop-2-en-1-one (1)



To a solution of 1-(2-hydroxy-4-methoxy-3-propylphenyl)ethan-1-one (**25**, 700 mg, 3.36 mmol, 1 eq.) in methanol was added an aqueous solution of 40% sodium hydroxide to pH 13–14. Then, a solution of 3,4,5-trimethoxybenzaldehyde (1.32 g, 6.72 mmol, 2 eq.) in methanol was slowly added to the reaction mixture. The reaction was refluxed for 18 h. After cooling, the reaction was poured onto crushed ice and the pH was adjusted to 6–8, with 5M HCl solution and extracted with ethyl acetate. The organic layer was rinsed with brine and water, dried over with anhydrous sodium sulfate, and evaporated under reduced pressure. The obtained residue was purified by flash column chromatography (SiO<sub>2</sub>; dichloromethane, 100%). An orange solid (40% yield) corresponding to (*E*)-1-(2-hydroxy-4-methoxy-3-propylphenyl)-3-(3,4,5-trimethoxyphenyl)prop-2-en-1-one (**1**) was obtained.

**(*E*)-1-(2-hydroxy-4-methoxy-3-propylphenyl)-3-(3,4,5-trimethoxyphenyl)prop-2-en-1-one (1)** <sup>1</sup>H NMR (CDCl<sub>3</sub>, 300.13 MHz)  $\delta$ : 7.64 (d,  $J$  = 15.7 Hz, 1H, H- $\beta$ ), 7.62 (d,  $J$  = 8.6 Hz, 1H, H-6), 7.50 (d,  $J$  = 15.7 Hz, 1H, H- $\alpha$ ), 6.84 (s, 2H, H-2', -6'), 6.73 (d,  $J$  = 8.7 Hz, 1H, H-5), 5.46–5.40 (m, 2H, H-2''), 4.28 (d,  $J$  = 7.2 Hz, 2H, H-1''), 3.90 (s, 6H, 3', 5'-OCH<sub>3</sub>), 3.89 (s, 3H, 4'-OCH<sub>3</sub>), 3.88 (s, 3H, 4-OCH<sub>3</sub>), 2.66 (t,  $J$  = 7.8 Hz, 3H, H-2''), 1.59–1.54 (m, 2H, H-1'), 1.62 (s, 3H, H-4''), 1.50 (s, 3H, H-5''), 1.00 (t,  $J$  = 7.4 Hz, 3H, H-3'') ppm; <sup>13</sup>C NMR (CDCl<sub>3</sub>, 75.47 MHz)  $\delta$ : 191.5 (C=O), 162.0 (C-4), 157.9 (C-2), 153.4 (C-3', -5'), 142.8 (C- $\beta$ ), 140.1 (C-4'), 138.3 (C-4''), 131.0 (C-1'), 129.8 (C-6), 126.7 (C-1), 126.1 (C- $\alpha$ ), 125.4 (C-3), 120.1 (C-2''), 106.4 (C-5), 105.6 (C-2', -6'), 73.1 (C-1''), 61.1 (4'-OCH<sub>3</sub>), 56.3 (3', 5'-OCH<sub>3</sub>), 55.8 (4-OCH<sub>3</sub>), 26.1 (C-1'), 25.8 (C-4''), 23.0 (C-2''), 18.0 (C-5''), 14.7 (C-3'') ppm.

#### Experimental description of compounds of group A3 (17–24)

An aqueous solution of 40% sodium hydroxide was added to a solution of appropriate ketone (100–200 mg, 0.99–1.72 mmol, 1 eq.) in methanol until pH 13–14. Then, a solution of appropriate benzaldehyde (0.4–2.03 g, 2.99 mmol, 3 eq.) in methanol was slowly added to the reaction mixture. The reaction was left at room temperature for 22 h–7 days and was monitored by TLC. After, crushed ice was added to the reaction mixture and neutralized with 5 M HCl solution. For the synthesis of the diarylpentanoids **17** and **19** after the addition of crushed ice, the solution was extracted with chloroform (3x50 mL), and the organic layers were collected, washed with water, dried over with anhydrous sodium sulfate and concentrated under reduced pressure. For the synthesis of compounds **18**, **20**, and **21–24** the obtained solid was filtrated, washed with water, dried, and purified.

**(1*E*,4*E*)-1,5-bis(4-chlorophenyl)penta-1,4-dien-3-one (17)**: Purified by crystallization from methanol. Yield: 81% as yellow solid; 99.8% purity; **mp** 191–194 °C (methanol); <sup>1</sup>H NMR (CDCl<sub>3</sub>, 300.13 MHz)  $\delta$ : 7.68 (d,  $J$  = 15.9 Hz, 2H, H- $\beta$ ), 7.54 (d,  $J$  = 8.5 Hz, 4H, H-2', -6'), 7.39 (d,  $J$  = 8.5 Hz, 4H, H-3', -5'), 7.03 (d,  $J$  = 15.9 Hz, 2H, H- $\alpha$ ) ppm; <sup>13</sup>C NMR (CDCl<sub>3</sub>, 75.47 MHz)  $\delta$ : 188.5 (C=O), 142.2 (C- $\beta$ ), 136.7 (C-4'), 133.3 (C-1'), 129.7 (C-2', -6'), 129.4 (C-3', -5'), 126.3 (C- $\alpha$ ) ppm.

**2,5-bis((*E*)-4-chlorobenzylidene)cyclopentan-1-one (18)**: Purified by TLC (n-hexane : ethyl acetate, 7:3). Yield: 90% as yellow solid; 95.4% purity; **mp** 185–188 °C (ethyl acetate); <sup>1</sup>H NMR (CDCl<sub>3</sub>, 300.13 MHz)  $\delta$ : 7.54 (sl, 2H, H-1''), 7.52 (d,  $J$  = 8.6 Hz, 4H, H-2', -6'), 7.41 (d,  $J$  = 8.6 Hz, 4H, H-3', -5'), 3.09 (sl, 4H, H-3, -4) ppm; <sup>13</sup>C NMR (CDCl<sub>3</sub>, 75.47 MHz)  $\delta$ : 196.1 (C=O), 137.5 (C-2, -5), 135.6 (C-4'), 134.3 (C-1'), 132.8 (C-1''), 132.0 (C-2', -6'), 129.2 (C-3', -5'), 26.6 (C-3, -4) ppm.

**2,6-bis((*E*)-4-chlorobenzylidene)cyclohexan-1-one (19)**: Purified by crystallization from methanol. Yield: 33% as yellow solid; 96.1% purity; **mp** 144–146 °C (methanol); <sup>1</sup>H NMR (CDCl<sub>3</sub>, 300.13 MHz)  $\delta$ : 7.72 (t,  $J$  = 2.1 Hz, 2H, H-1''), 7.38 (sl, 8H, H-2', -3', -5', -6'), 2.89 (td,  $J$  = 6.2; 2.0 Hz, 4H, H-3, -5), 1.34 (quintet,  $J$  = 6.0



Hz, 2H, H-4) ppm;  $^{13}\text{C}$  NMR ( $\text{CDCl}_3$ , 75.47 MHz)  $\delta$ : 190.8 (C=O), 136.5 (C-2,-6), 135.9 (C-1''), 134.8 (C-4'), 134.4 (C-1'), 131.7 (C-2', -6'), 128.8 (C-3', -5'), 29.0 (C-3, -5), 23.4 (C-4) ppm.

**3,5-bis((Z-4-chlorobenzylidene)tetrahydro-4H-thiopyran-4-one (20):** Purified by crystallization from methanol. Yield: 31% as yellow solid; 99.9% purity; **mp** 126-128 °C (methanol);  $^1\text{H}$  NMR ( $\text{CDCl}_3$ , 300.13 MHz)  $\delta$ : 7.71 (s, 2H, H-1''), 7.40 (d,  $J$  = 8.6 Hz, 4H, H-3', -5'), 7.32 (d,  $J$  = 8.6 Hz, 4H, H-2', -6'), 3.87 (sl, 4H, H-3, -5) ppm;  $^{13}\text{C}$  NMR ( $\text{CDCl}_3$ , 75.47 MHz)  $\delta$ : 188.7 (C=O), 135.9 (C-1''), 135.2 (C-4'), 134.3 (C-2, -6), 133.6 (C-1'), 131.0 (C-2', -6'), 129.1 (C-3', -5'), 30.7 (C-3, -5) ppm.

**(1E,4E)-1,5-bis(3,4,5-trimethoxyphenyl)penta-1,4-dien-3-one (21):** Purified by crystallization from methanol. Yield: 49% as yellow solid; 99.5% purity; **mp** 127-129 °C (methanol);  $^1\text{H}$  NMR ( $\text{CDCl}_3$ , 300.13 MHz)  $\delta$ : 7.66 (d,  $J$  = 15.8 Hz, 2H, H- $\beta$ ), 6.98 (d,  $J$  = 15.8 Hz, 2H, H- $\alpha$ ), 6.85 (s, 4H, H-2', -6'), 3.93 (s, 6H, 3', 5'-OCH<sub>3</sub>), 3.90 (s, 3H, 3', 5'-OCH<sub>3</sub>) ppm;  $^{13}\text{C}$  NMR ( $\text{CDCl}_3$ , 75.47 MHz)  $\delta$ : 188.6 (C=O), 153.6 (C-3', -5'), 143.5 (C- $\beta$ ), 140.5 (C-4'), 130.4 (C-1'), 124.9 (C- $\alpha$ ), 105.7 (C-2', -6'), 61.2 (4'-OCH<sub>3</sub>), 56.3 (3', 5'-OCH<sub>3</sub>), ppm.

**2,5-bis((E)-3,4,5-trimethoxybenzylidene)cyclopentan-1-one (22):** Purified by crystallization from methanol. Yield: 90% as yellow solid; 99.5% purity; **mp** 203-205 °C (methanol);  $^1\text{H}$  NMR ( $\text{CDCl}_3$ , 300.13 MHz)  $\delta$ : 7.52 (sl, 2H, H-1''), 6.84 (s, 4H, H-2', -6'), 3.91 (s, 6H, 3', 5'-OCH<sub>3</sub>), 3.90 (s, 3H, 3', 5'-OCH<sub>3</sub>) 3.14 (sl, 4H, H-3, -4) ppm;  $^{13}\text{C}$  NMR ( $\text{CDCl}_3$ , 75.47 MHz)  $\delta$ : 196.0 (C=O), 153.4 (C-2', -6'), 139.7 (C-4'), 136.2 (C-2, -5), 134.2 (C-1''), 131.5 (C-1'), 61.1 (4'-OCH<sub>3</sub>), 56.3 (3', 5'-OCH<sub>3</sub>), 26.6 (C-3, -4) ppm.

**2,6-bis((E)-3,4,5-trimethoxybenzylidene)cyclohexan-1-one (23):** Purified by crystallization from methanol. Yield: 60% as yellow solid; 98.9% purity; **mp** 196-198 °C (methanol);  $^1\text{H}$  NMR ( $\text{CDCl}_3$ , 300.13 MHz)  $\delta$ : 7.72 (sl, 2H, H-1''), 6.71 (s, 4H, H-2', -6'), 3.89 (s, 6H, 3', 5'-OCH<sub>3</sub>), 3.88 (s, 3H, 4'-OCH<sub>3</sub>), 2.95 (td,  $J$  = 6.2; 2.0 Hz, 4H, H-3, -5), 1.34 (quintet,  $J$  = 6.0 Hz, 2H, H-4) ppm;  $^{13}\text{C}$  NMR ( $\text{CDCl}_3$ , 75.47 MHz)  $\delta$ : 190.1 (C=O), 153.1 (C-3', -5'), 138.9 (C-4'), 137.3 (C-1''), 135.5 (C-2, -6), 131.6 (C-1'), 108.0 (C-2', -6'), 61.1 (4'-OCH<sub>3</sub>), 56.3 (3', 5'-OCH<sub>3</sub>), 28.6 (C-3, -5), 23.1 (C-4) ppm.

**3,5-bis((Z)-3,4,5-trimethoxybenzylidene)tetrahydro-4H-thiopyran-4-one (24):** Purified by crystallization from methanol. Yield: 55% as yellow solid; 96.7% purity; **mp** 219-222 °C (methanol);  $^1\text{H}$  NMR ( $\text{CDCl}_3$ , 300.13 MHz)  $\delta$ : 7.71 (sl, 2H, H-1''), 6.63 (s, 4H, H-2', -6'), 3.89 (s, 3H, 4'-OCH<sub>3</sub>), 3.88 (s, 6H, 3', 5'-OCH<sub>3</sub>), 3.95 (sl, 4H, H-3, -5) ppm;  $^{13}\text{C}$  NMR ( $\text{CDCl}_3$ , 75.47 MHz)  $\delta$ : 188.9 (C=O), 153.3 (C-3', -5'), 139.1 (C-4'), 137.3 (C-1''), 133.4 (C-2, -6), 130.7 (C-1'), 107.6 (C-2', -6'), 61.1 (4'-OCH<sub>3</sub>), 56.4 (3', 5'-OCH<sub>3</sub>), 30.2 (C-3, -5) ppm.

## Experimental description of compounds of group B2 (28)

**(E)-6-(1-hydroxy-3-(3,4,5-trimethoxyphenyl)allyl)-3-methoxy-2-propylphenol (28):** Purified by TLC ( $\text{SiO}_2$ ; n-hexane: ethyl acetate, 9:1). Yield: 15% yellow gum; 99.8% purity; **mp** 219-222 °C (methanol);  $^1\text{H}$  NMR ( $\text{CDCl}_3$ , 300.13 MHz)  $\delta$ : 6.96 (d,  $J$  = 8.3 Hz, 1H, H-6), 6.57 (s, 2H, H-2', -6'), 6.46 (d,  $J$  = 9.0 Hz, 1H, H-5), 6.43 (d,  $J$  = 16.0 Hz, 1H, H-3'''), 6.33-6.23 (m, 1H, H-2'''), 5.01 (sl, 1H, 1'''-OH), 3.85 (s, 6H, 3', 5'-OCH<sub>3</sub>), 3.84 (s, 3H, 4'-OCH<sub>3</sub>), 3.80 (s, 3H, 4-OCH<sub>3</sub>), 3.50 (d,  $J$  = 6.4 Hz, 1H, H-1''), 2.61 (t,  $J$  = 7.6 Hz, 2H, H-1''), 1.59-1.48 (m, 2H, H-2''), 0.96 (t,  $J$  = 7.4 Hz, 3H, H-3'') ppm;  $^{13}\text{C}$  NMR ( $\text{CDCl}_3$ , 75.47 MHz)  $\delta$ : 157.6 (C-4), 153.4 (C-3', -5'), 153.1 (C-2), 137.7 (C-4'), 132.9 (C-1'), 131.3 (C-3'''), 128.2 (C-2'''), 127.5 (C-6), 117.9 (C-1), 117.6 (C-3), 103.3 (C-2', -6'), 103.0 (C-5), 61.1 (4'-OCH<sub>3</sub>), 56.2 (3', 5'-OCH<sub>3</sub>), 55.7 (4-OCH<sub>3</sub>), 34.4 (C-1'''), 26.3 (C-1''), 22.5 (C-2''), 14.4 (C-3'') ppm.



### Experimental description of compounds of group C1 (32)

**(E)-3-(4-chlorophenyl)-1-(2-hydroxy-4-methoxy-3-propylphenyl)prop-2-en-1-one (32):** Purified by TLC (SiO<sub>2</sub>; n-hexane: dichloromethane, 5:5). Yield: 10% as orange solid; 99.2% purity; **mp** 109–112 °C (dichloromethane); <sup>1</sup>H NMR (CDCl<sub>3</sub>, 300.13 MHz) δ: 13.30 (s, 1H, 2-OH), 7.82 (d, *J* = 15.2 Hz, 1H, H-β), 7.78 (d, *J* = 8.7 Hz, 1H, H-6), 7.58 (dt, *J* = 8.6; 2.0 Hz, 2H, H-2', -6'), 7.57 (d, *J* = 15.5 Hz, 1H, H-α), 7.40 (dt, *J* = 8.8; 2.0 Hz, 2H, H-3', -5'), 6.50 (d, *J* = 9.0 Hz, 1H, H-5), 3.90 (s, 3H, 4-OCH<sub>3</sub>), 2.66 (t, *J* = 7.7 Hz, 2H, H-1''), 1.61–1.49 (m, 2H, H-2''), 0.96 (t, *J* = 7.4 Hz, 3H, H-3'') ppm; <sup>13</sup>C NMR (CDCl<sub>3</sub>, 75.47 MHz) δ: 192.1 (C=O), 163.9 (C-4), 163.5 (C-2), 142.7 (C-β), 136.6 (C-4'), 133.5 (C-1'), 129.8 (C-2', -6'), 129.4 (C-3', -5'), 129.2 (C-6), 121.3 (C-α), 118.8 (C-3), 114.5 (C-1), 102.2 (C-5), 56.9 (4-OCH<sub>3</sub>), 24.6 (C-1''), 22.0 (C-2''), 14.4 (C-3'') ppm.

### Experimental description of compounds of group C3 (37 and 39)

#### Synthesis of 2-((3-methylbut-2-en-1-yl)oxy)benzaldehyde (37)

To a solution of 2-hydroxybenzaldehyde (200 mg, 171 μL, 1.64 mmol, 1 eq.) and tetrabutylammonium hydroxide 30-hydrate (2.62 g, 3.28 mmol, 2 eq.) in chloroform / toluene 10:7 (17 mL) was added 1-bromo-3-methylbut-2-ene (57.8 mg, 44.8 μL, 388 μmol, 1.5 eq.) and the reaction was allowed to proceed at room temperature for 1.5 h under gentle stirring. The reaction mixture was then poured into an ice, toluene was evaporated, and the crude was extracted with chloroform (3x50 mL). The combined organic layers were washed with brine solution, rinsed with water, dried over with anhydrous sodium sulfate, and evaporated under reduced pressure. The resulting crude was purified by TLC (SiO<sub>2</sub>, dichloromethane : n-hexane, 6:4). An orange gum corresponding to 2-((3-methylbut-2-en-1-yl)oxy)benzaldehyde (**37**, 85% yield) was obtained.

#### Synthesis of 4-((3-methylbut-2-en-1-yl)oxy)benzaldehyde (39)

A mixture of 4-hydroxybenzaldehyde (500 mg, 4.09 mmol, 1 eq.), 1-bromo-3-methylbut-2-ene (976 mg, 757 μL, 6.55 mmol, 1.6 eq.) and anhydrous K<sub>2</sub>CO<sub>3</sub> (1.3 g, 8.19 mmol, 2 eq.) in anhydrous acetone was left at reflux for 1.5 h and was monitored by TLC. After cooling, the solvent was removed under reduced pressure to afford the crude product. The solid obtained was dissolved in chloroform and the solution was extracted with water (3x50 mL). The organic layers were collected, washed with water, dried over with anhydrous sodium sulfate, and concentrated under reduced pressure. The crude material was purified by TLC (SiO<sub>2</sub>, n-hexane : ethyl acetate, 8:2). A white gum (72% yield) corresponding to 4-((3-methylbut-2-en-1-yl)oxy)benzaldehyde (**39**) was obtained.

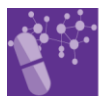

## NMR spectra

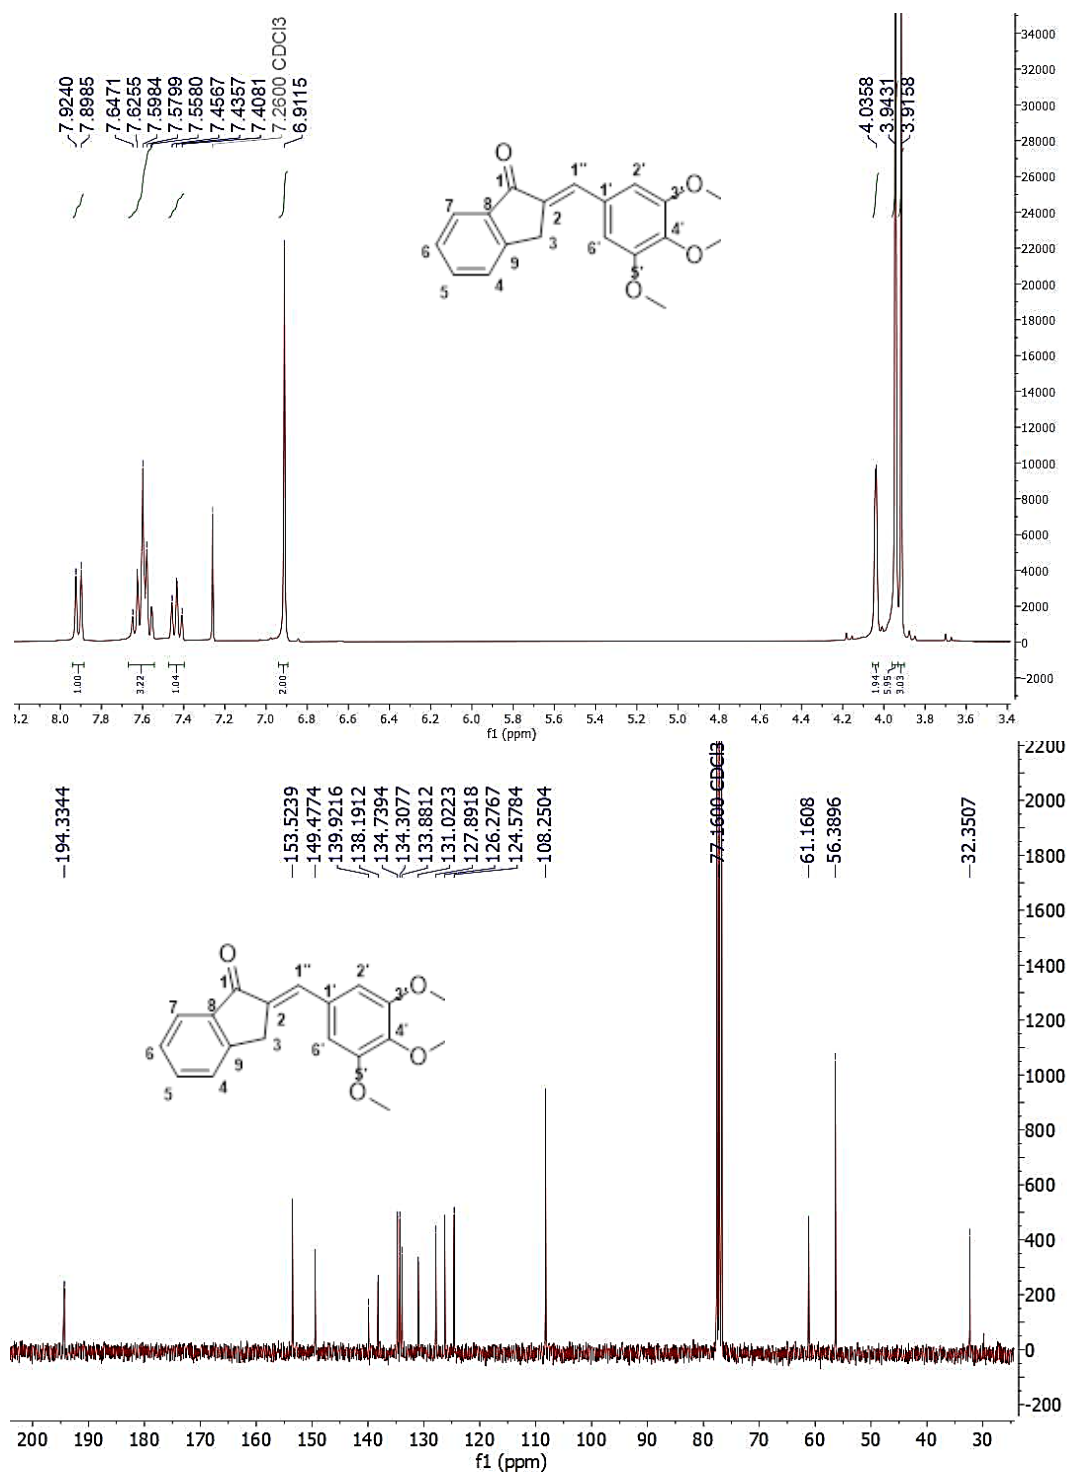Figure S1.  $^1\text{H}$  and  $^{13}\text{C}$  NMR of compound 3.



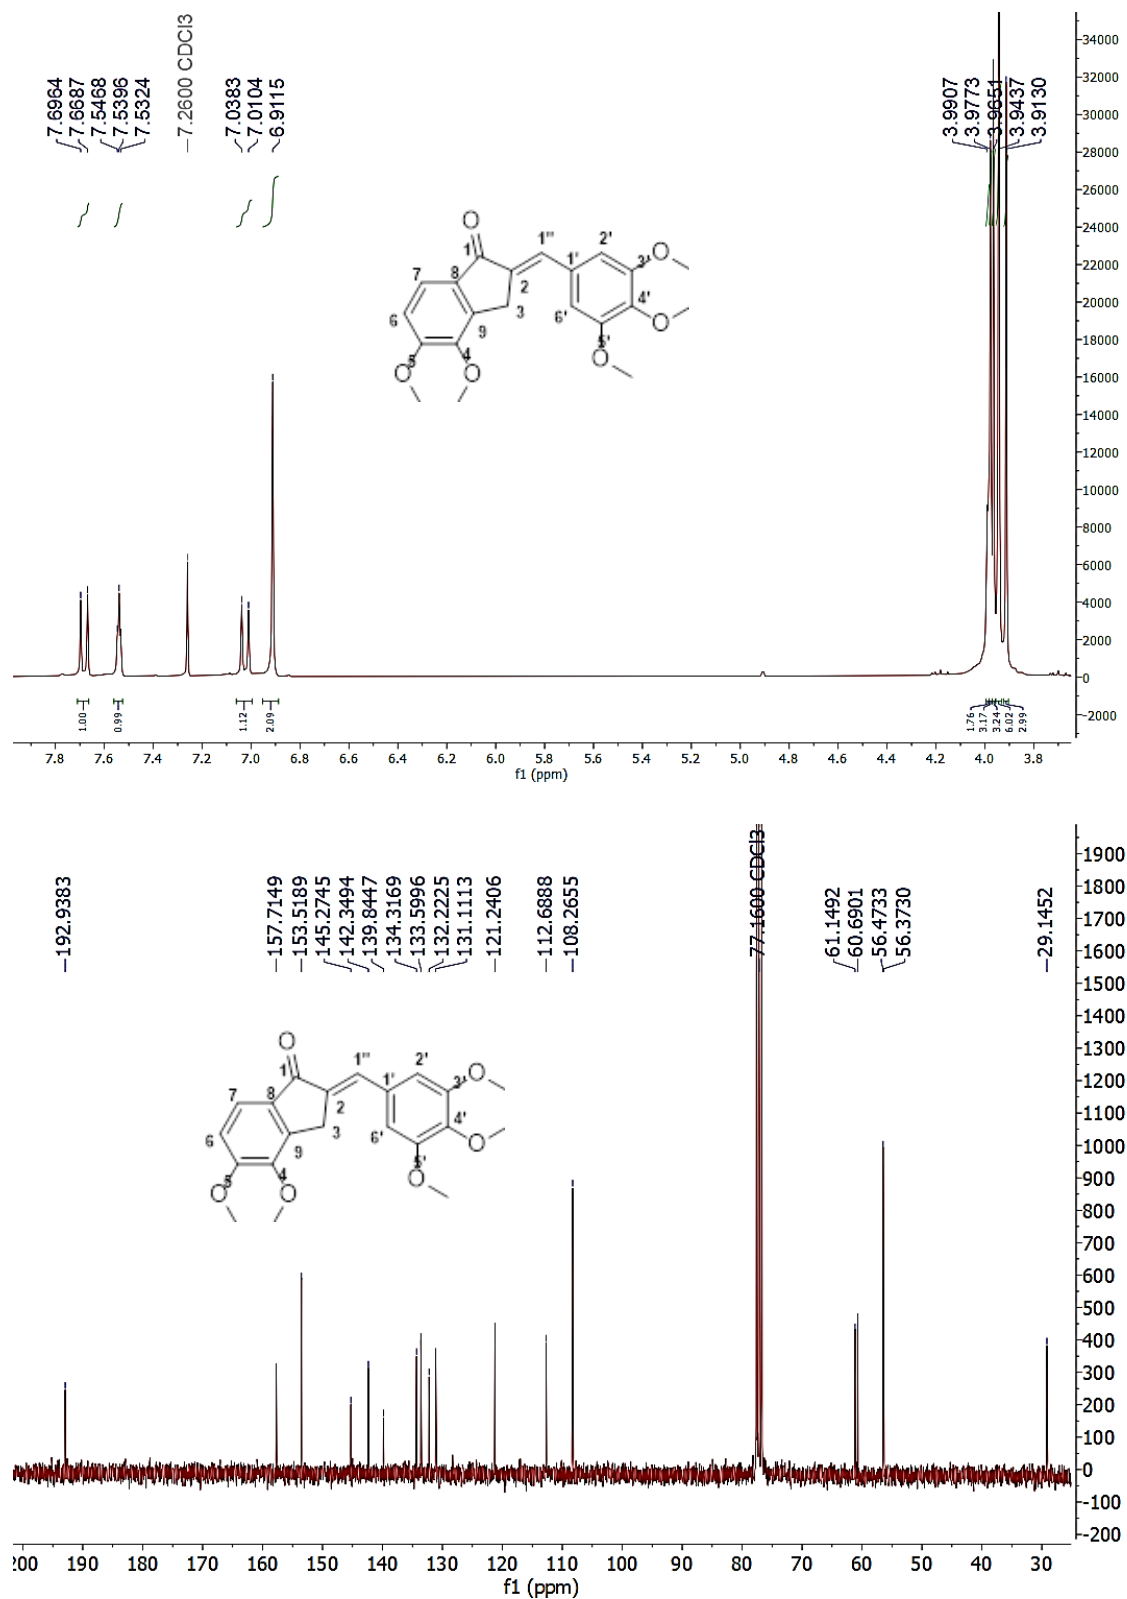Figure S2. <sup>1</sup>H and <sup>13</sup>C NMR of compound 4.

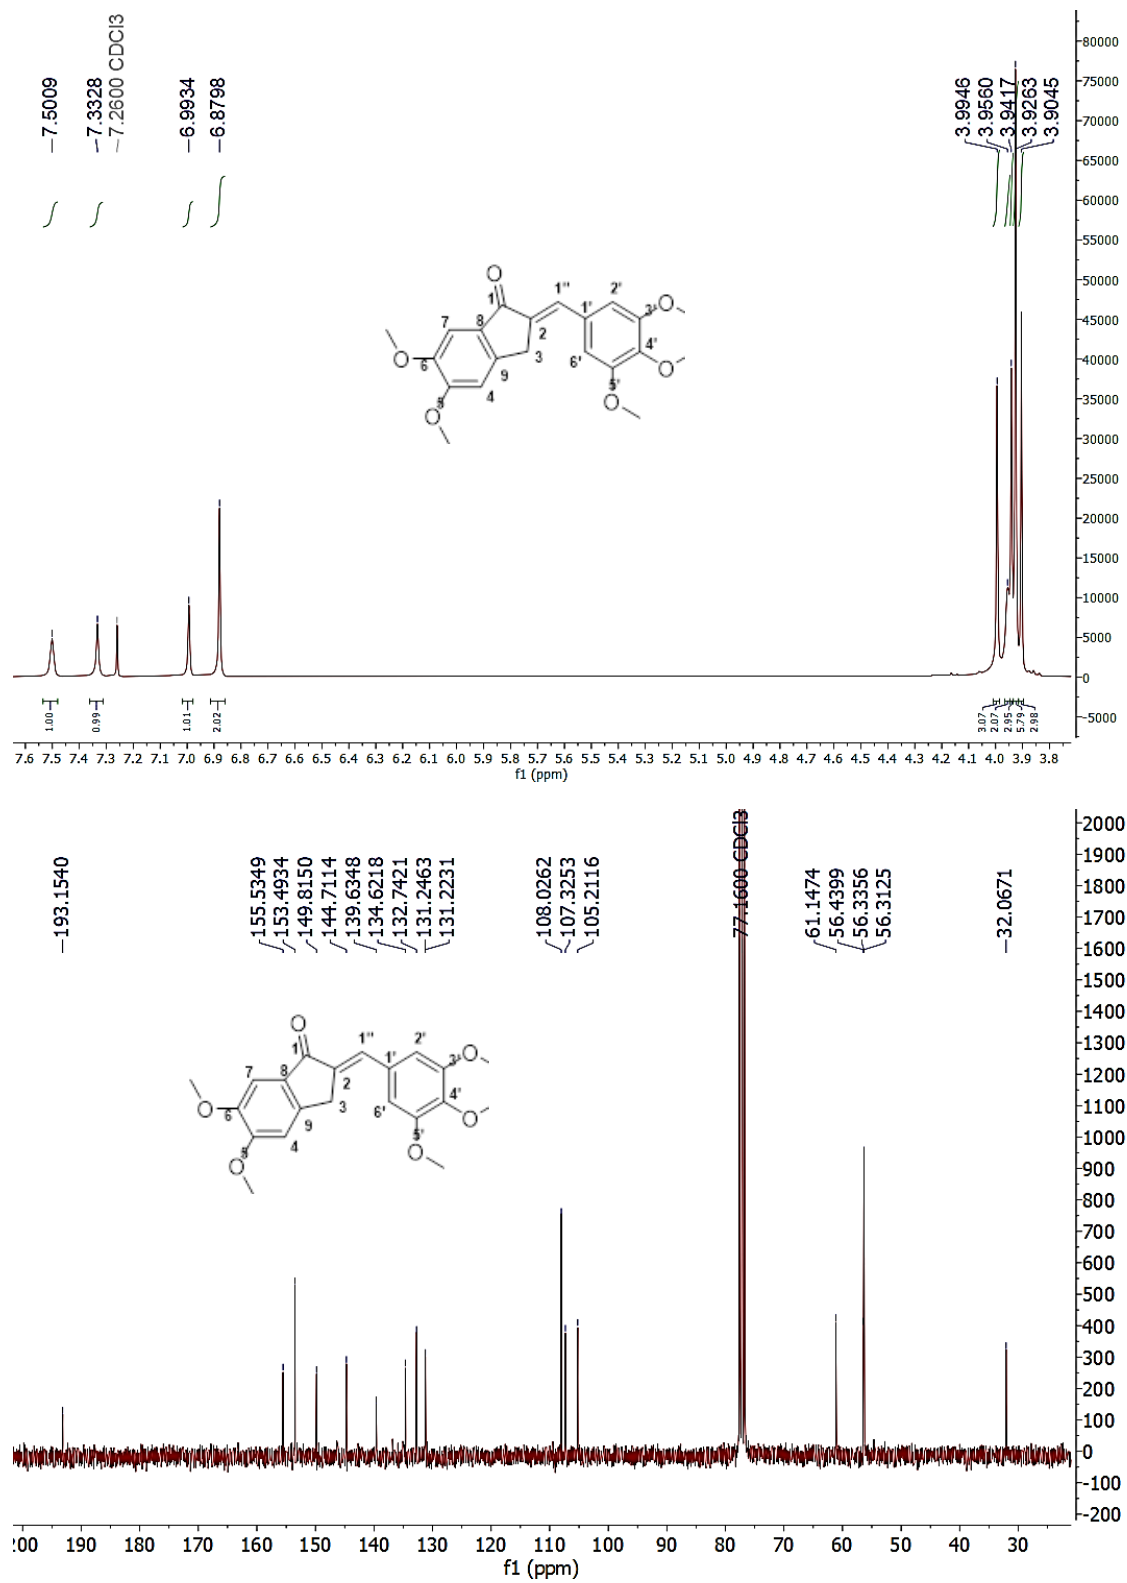Figure S3. <sup>1</sup>H and <sup>13</sup>C NMR of compound 5.



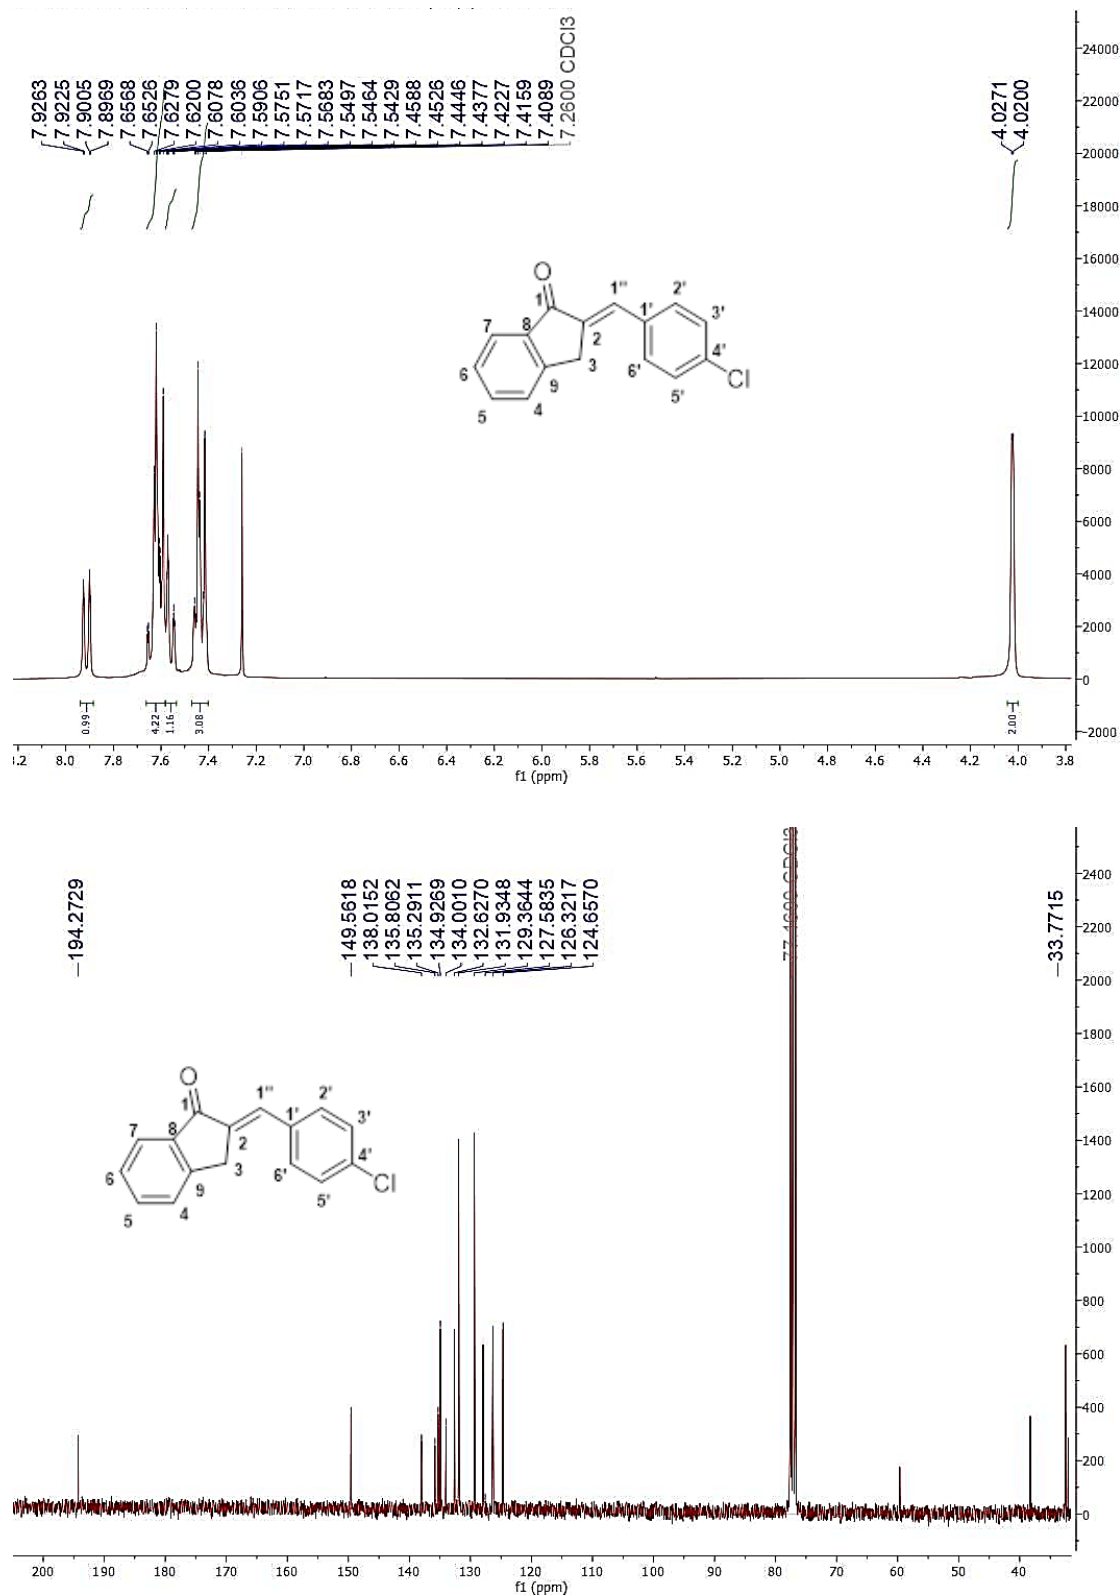

Figure S4. <sup>1</sup>H and <sup>13</sup>C NMR of compound 6.

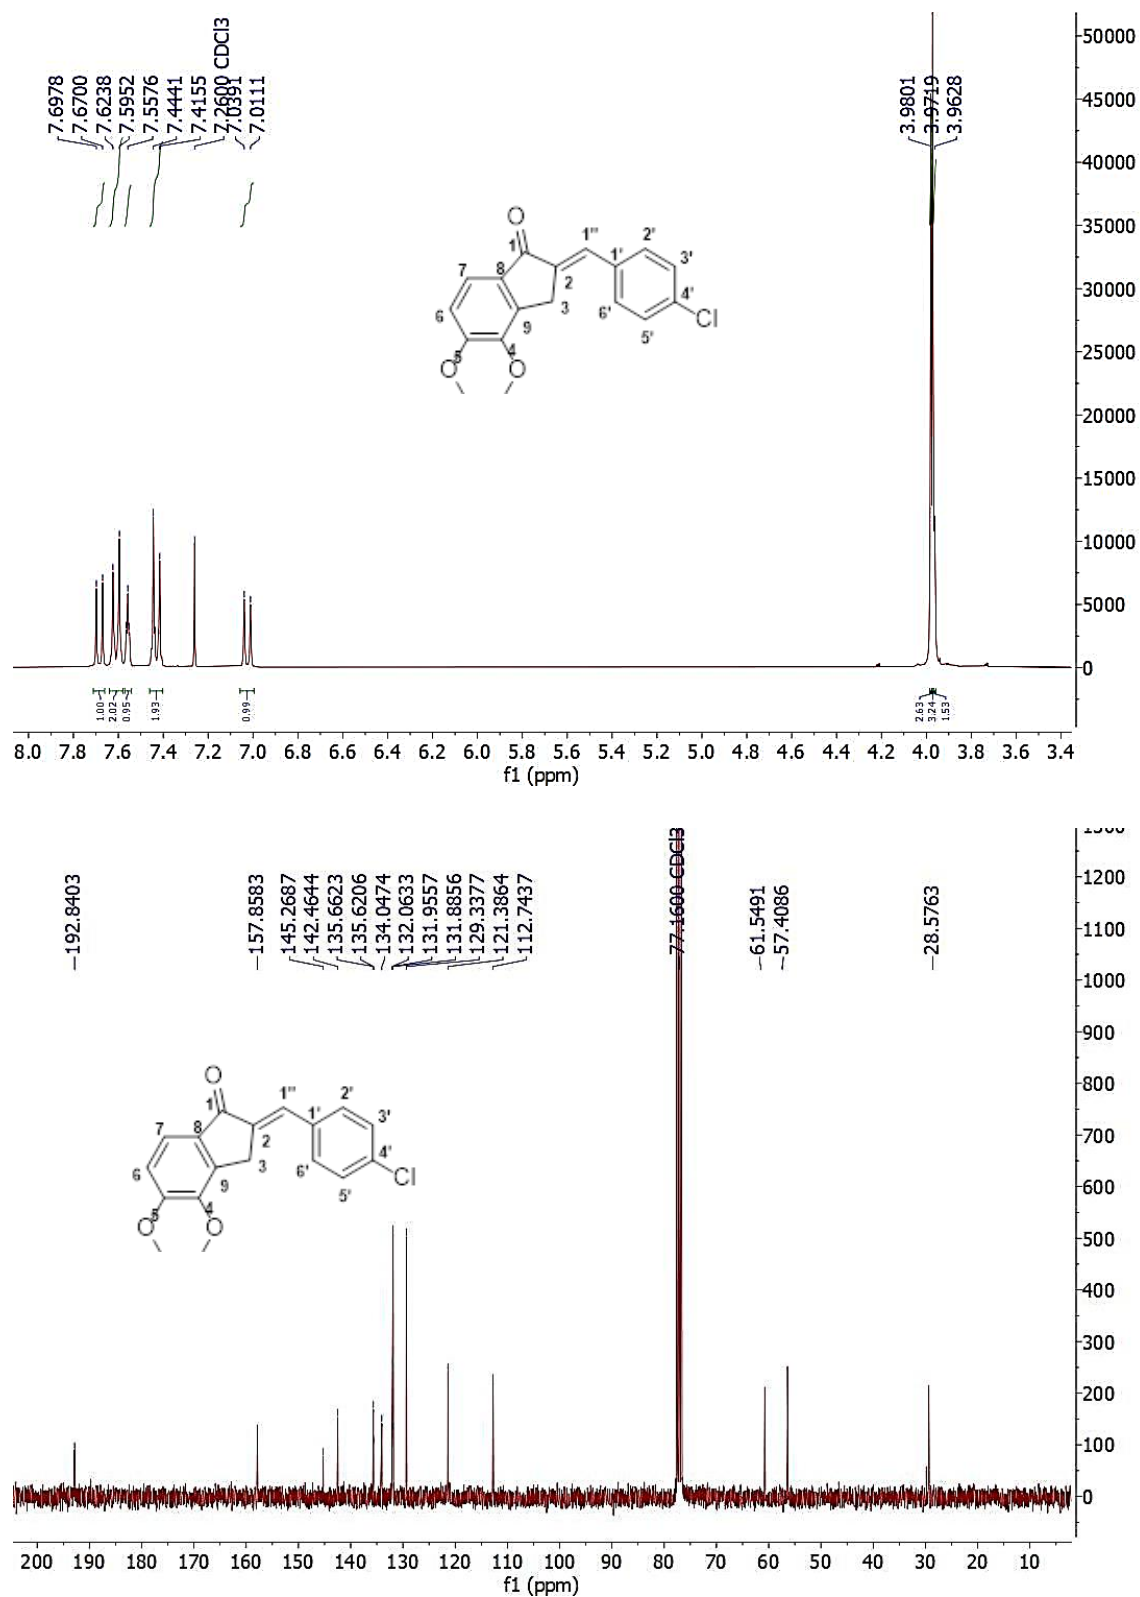

Figure S5.  $^1\text{H}$  and  $^{13}\text{C}$  NMR of compound 7.

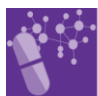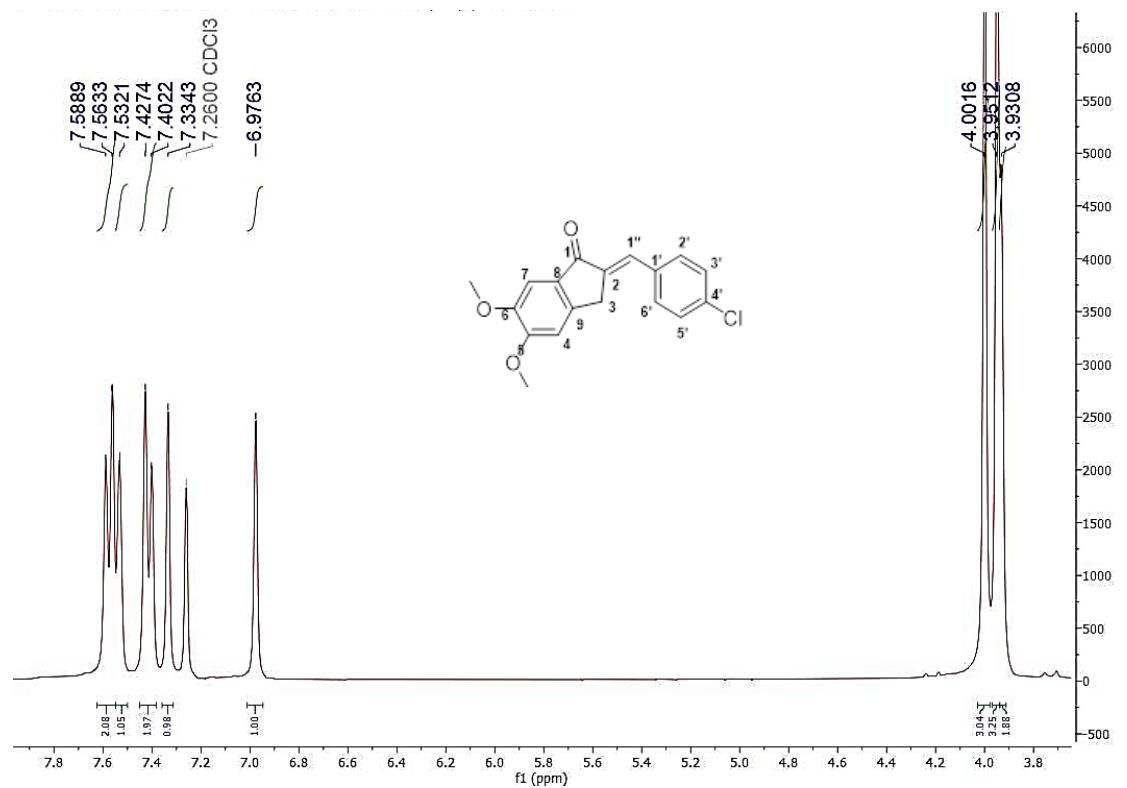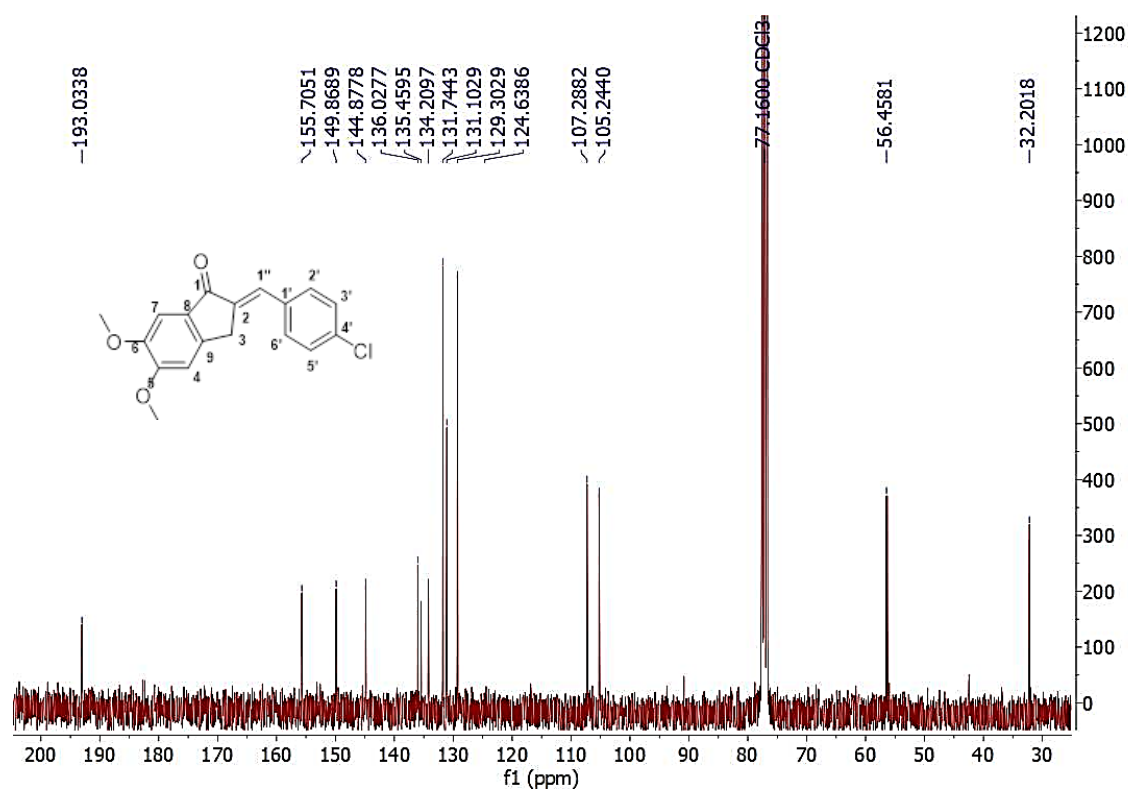

Figure S6. <sup>1</sup>H and <sup>13</sup>C NMR of compound 8.

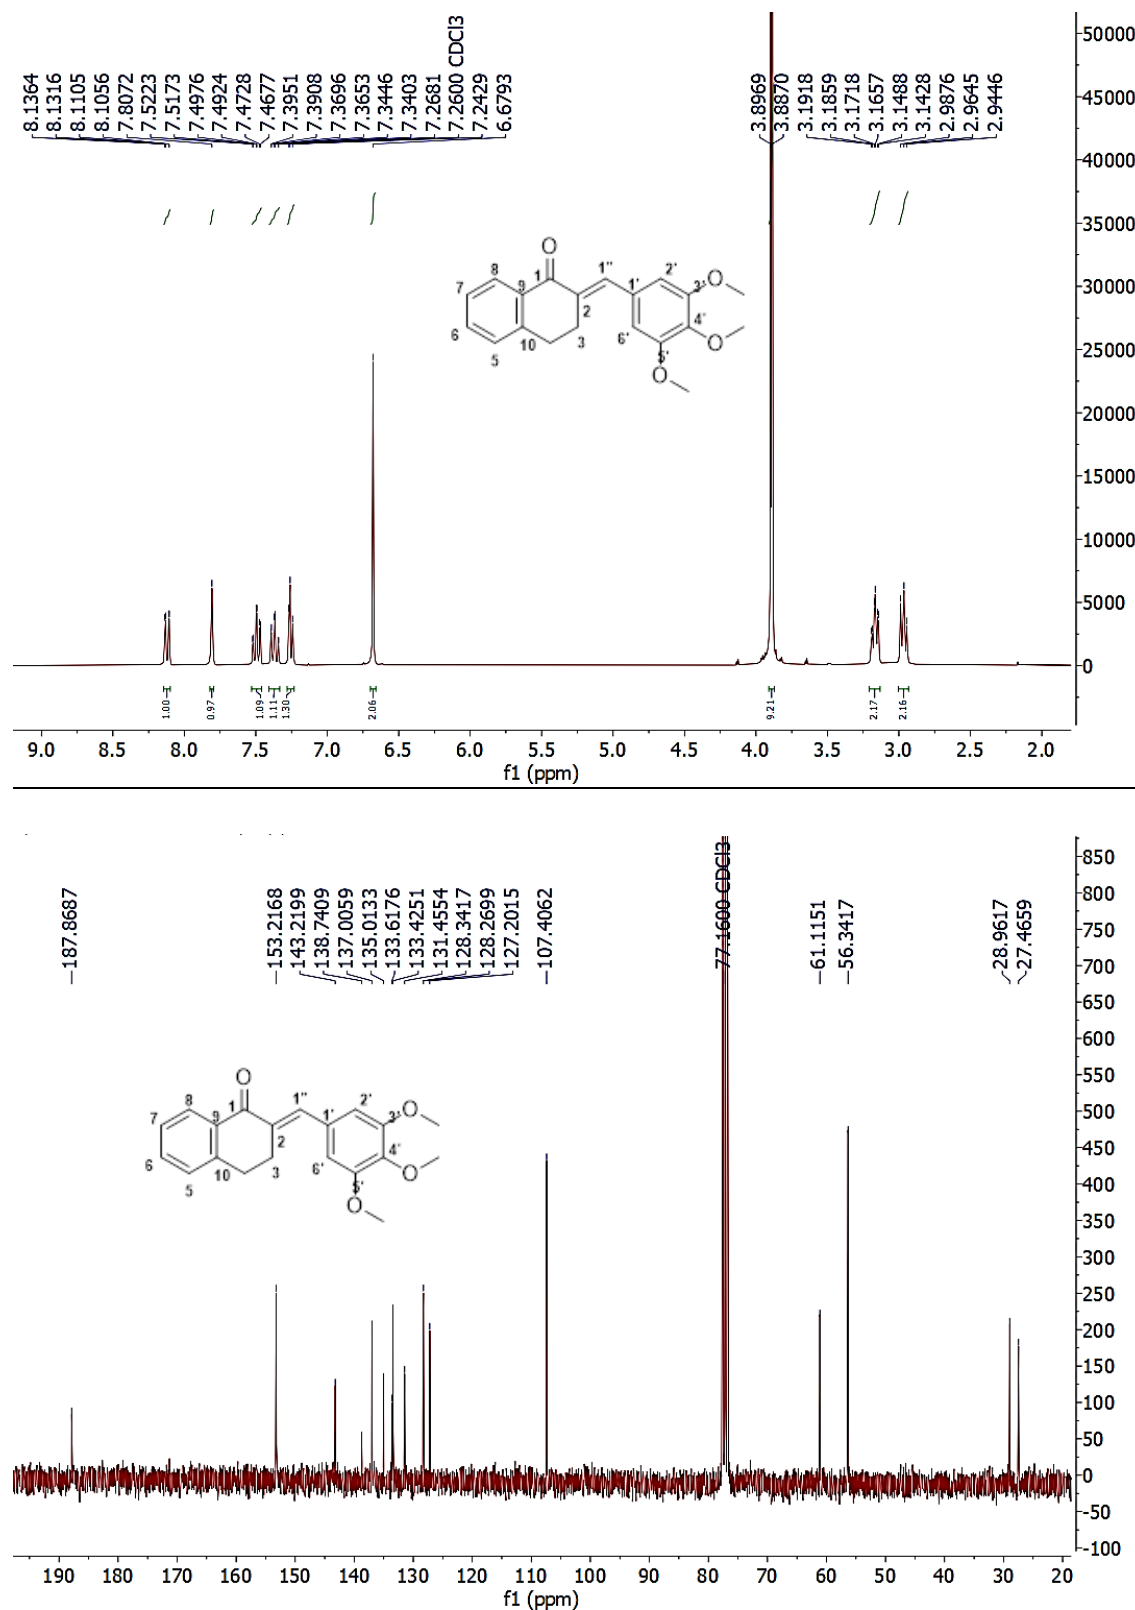Figure S7. <sup>1</sup>H and <sup>13</sup>C NMR of compound 9.

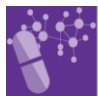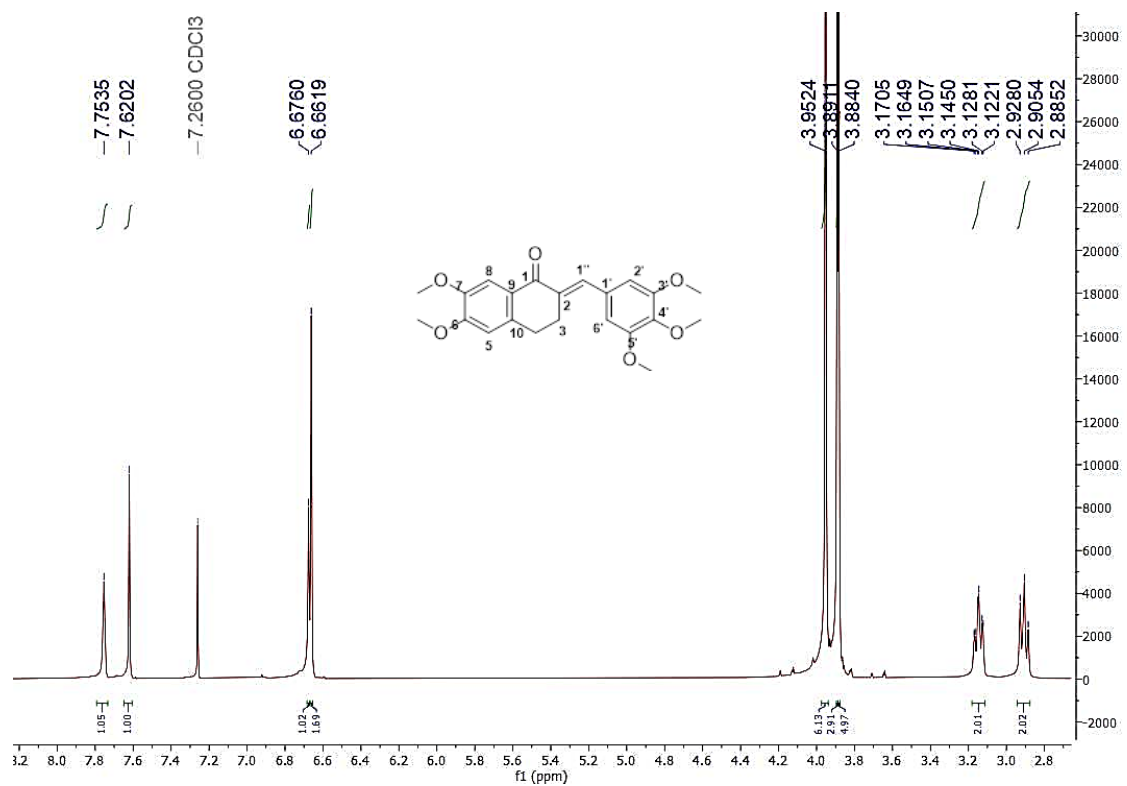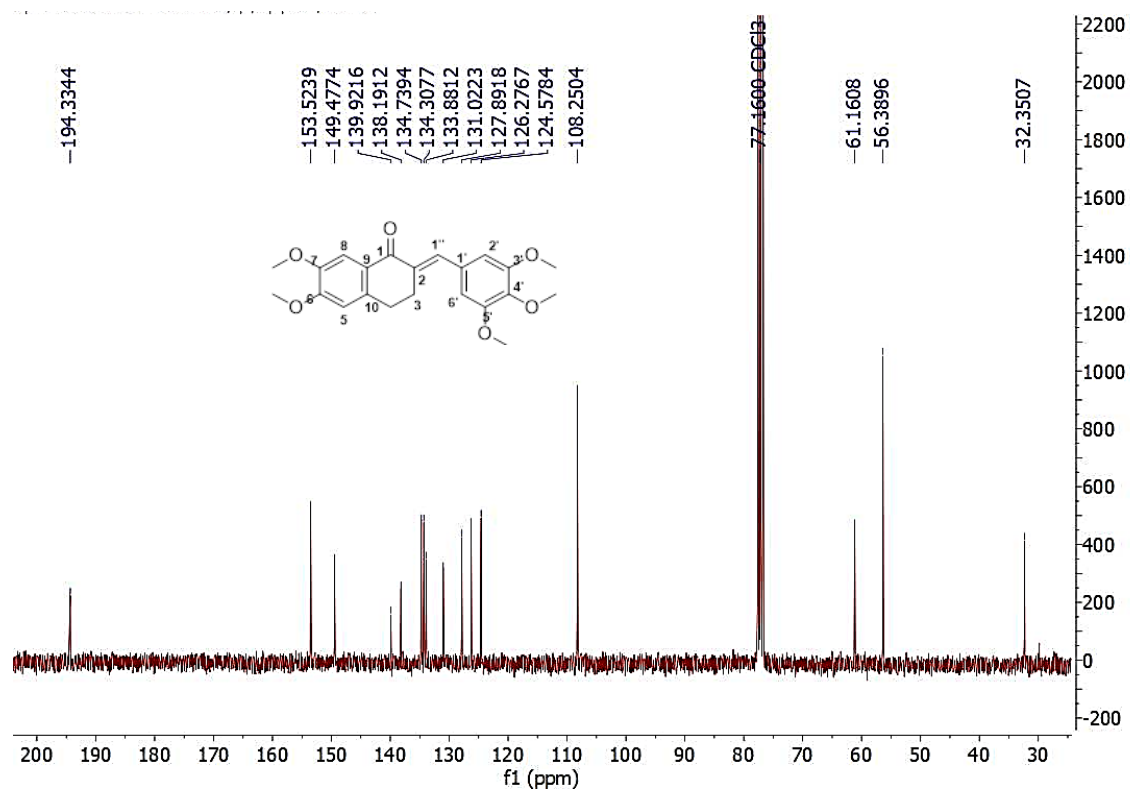

Figure S8. <sup>1</sup>H and <sup>13</sup>C NMR of compound 10.

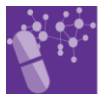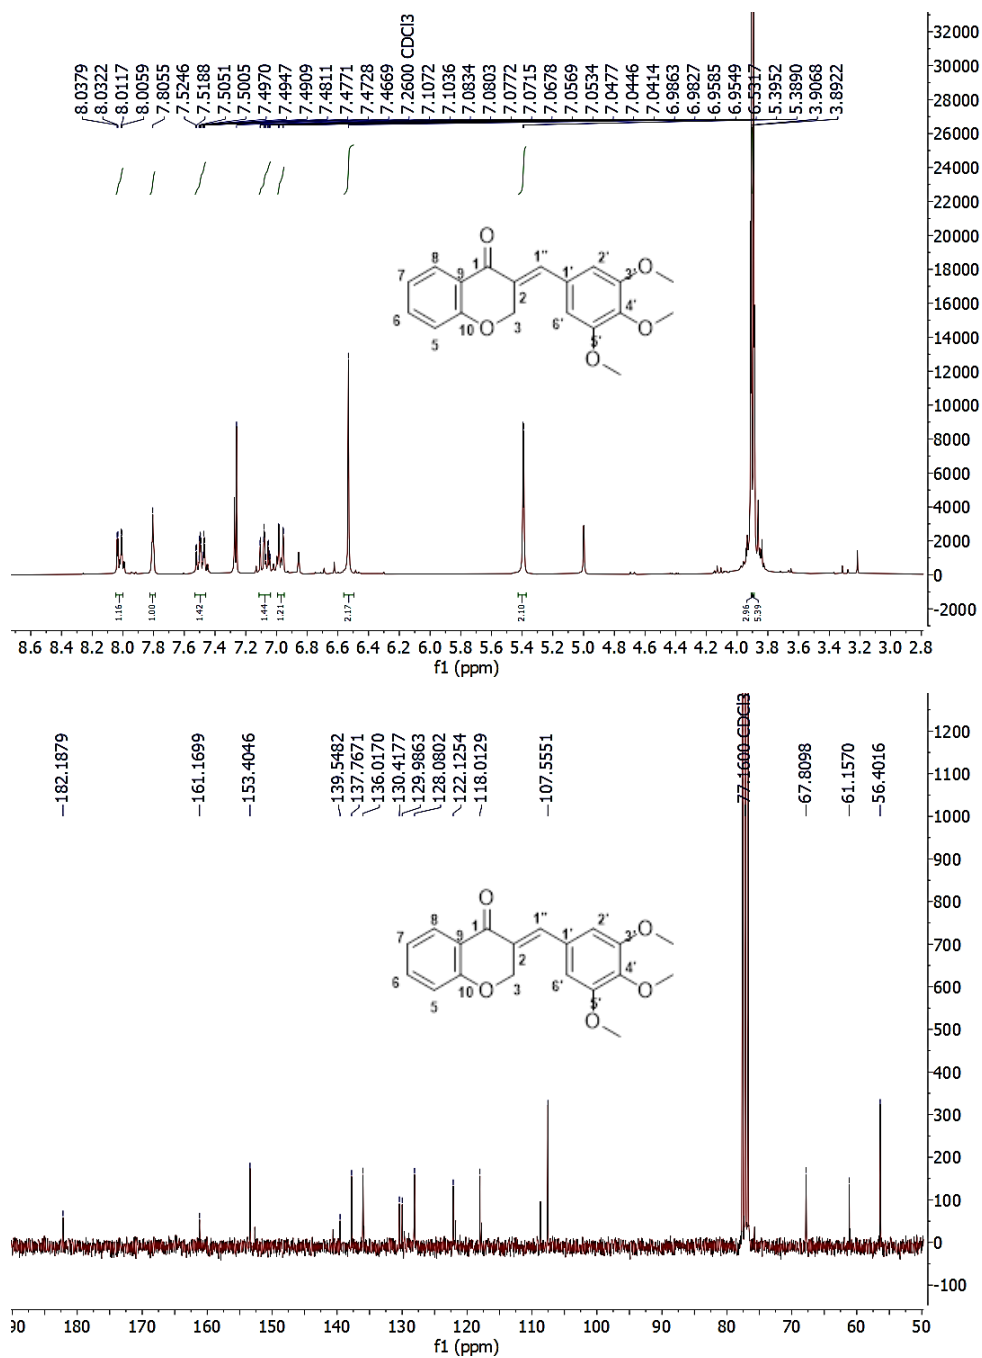

Figure S9. <sup>1</sup>H and <sup>13</sup>C NMR of compound 11.

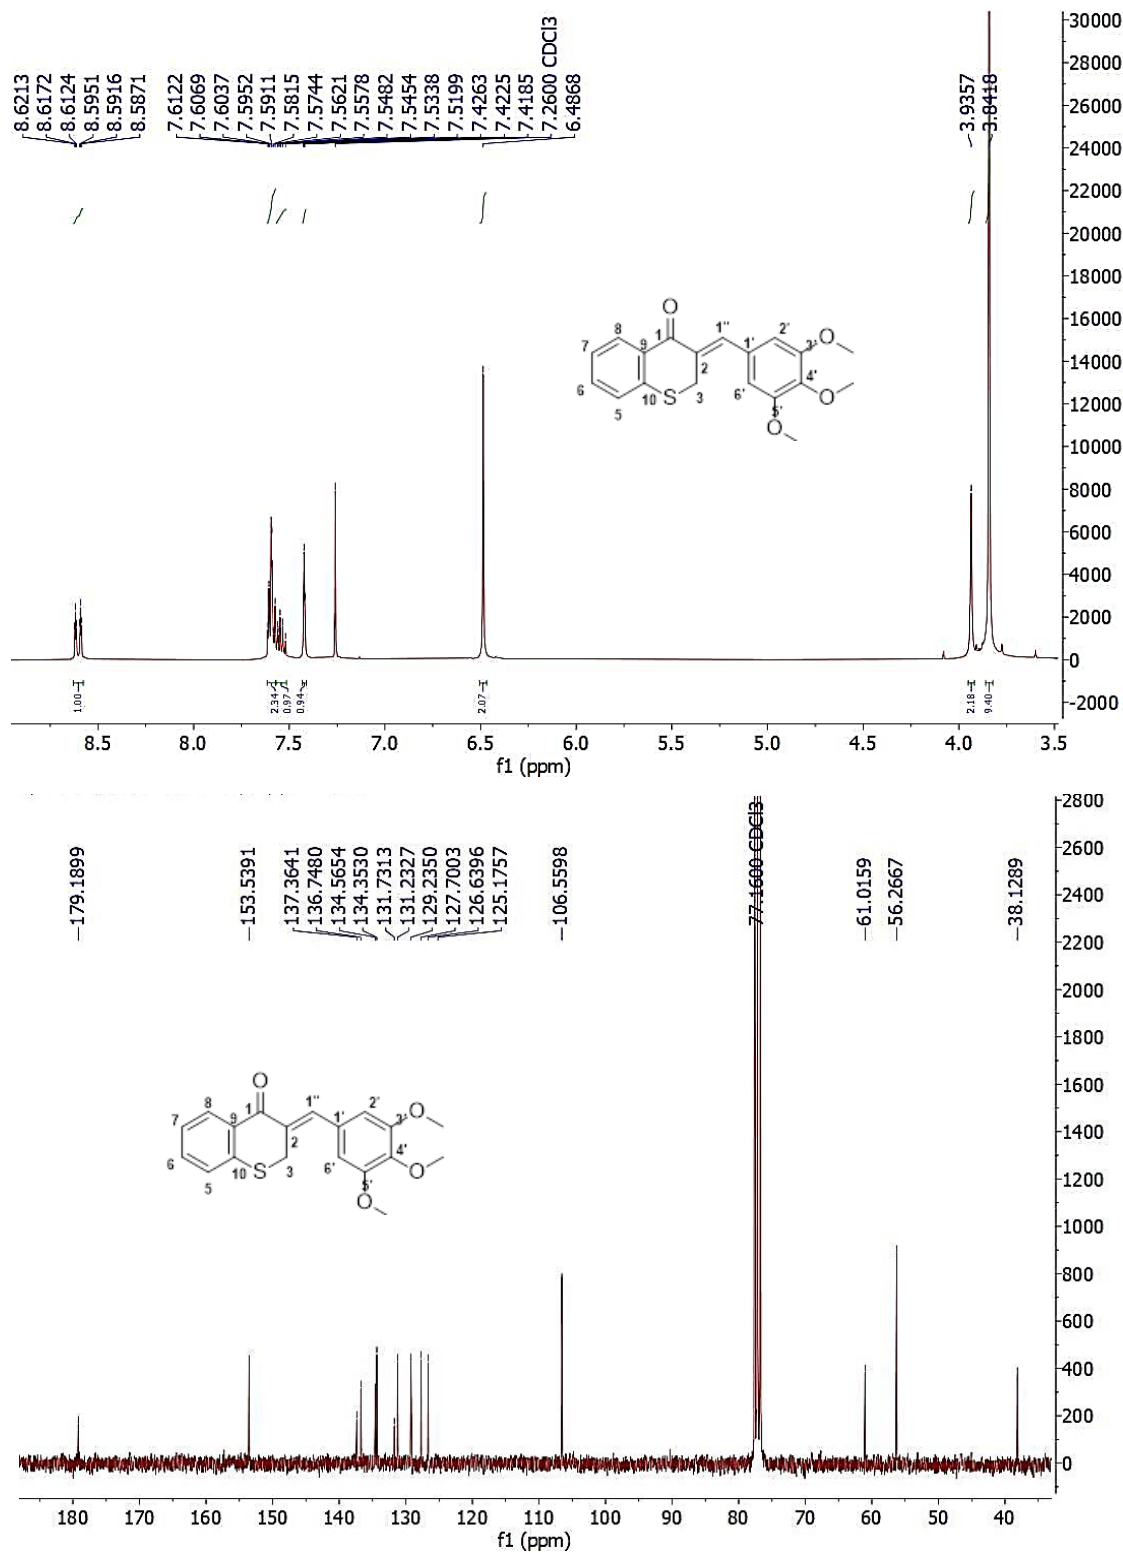Figure S10. <sup>1</sup>H and <sup>13</sup>C NMR of compound 12.

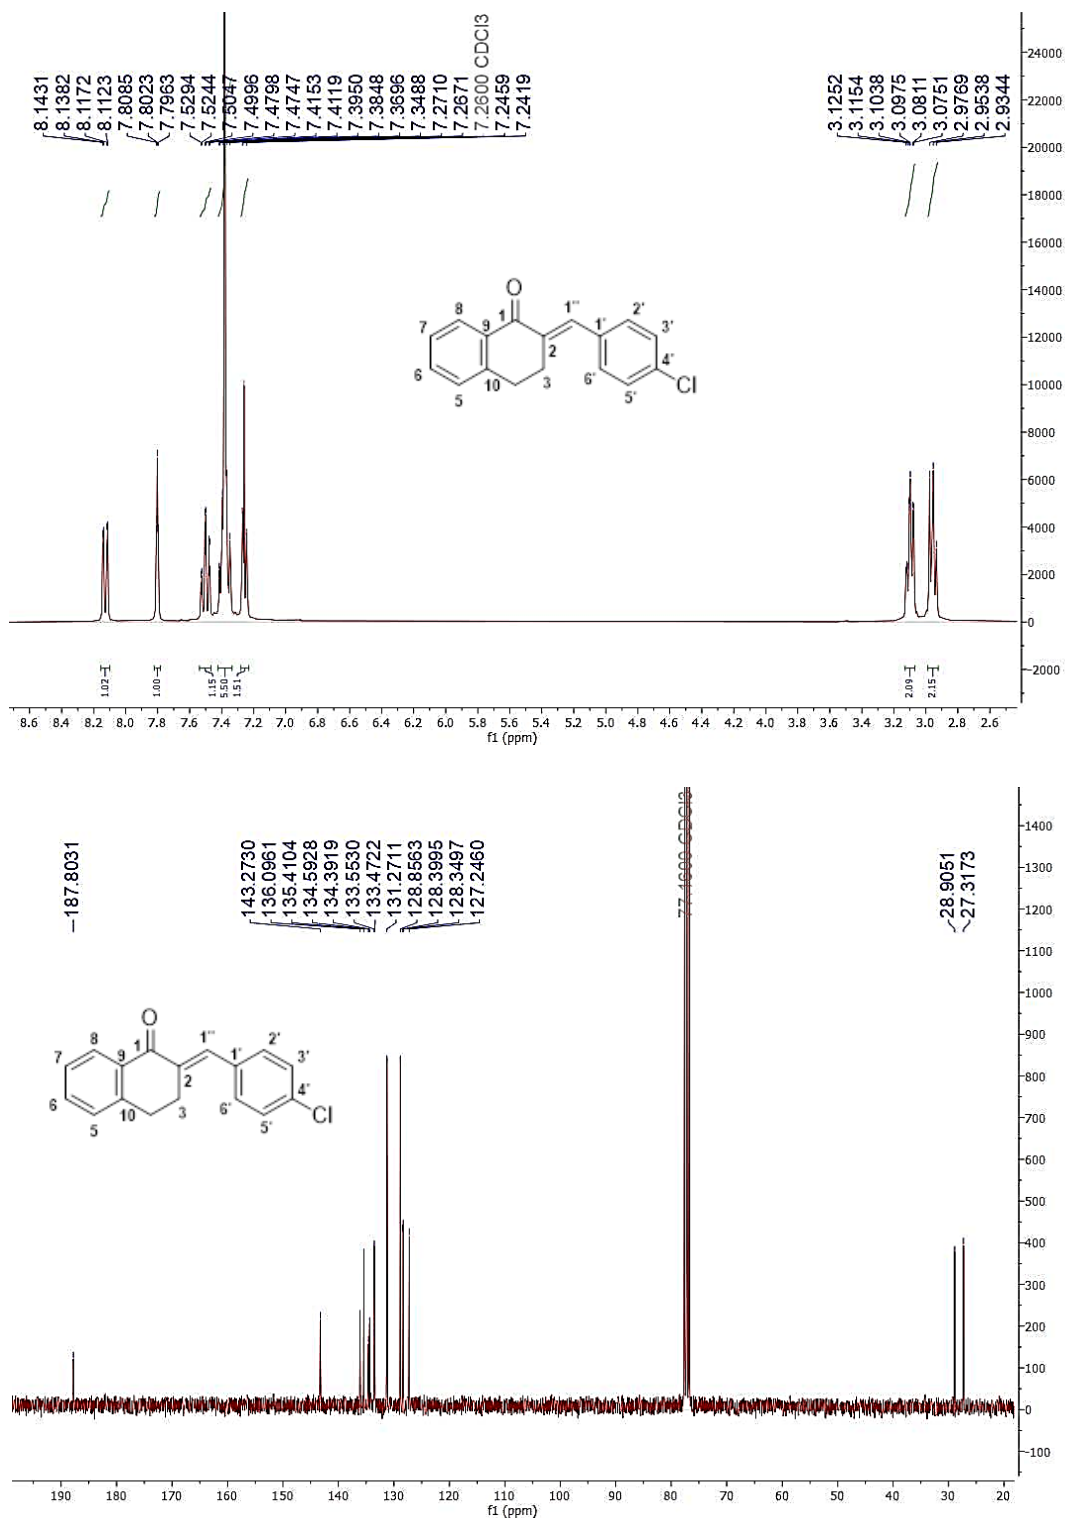

Figure S11. <sup>1</sup>H and <sup>13</sup>C NMR of compound 13.



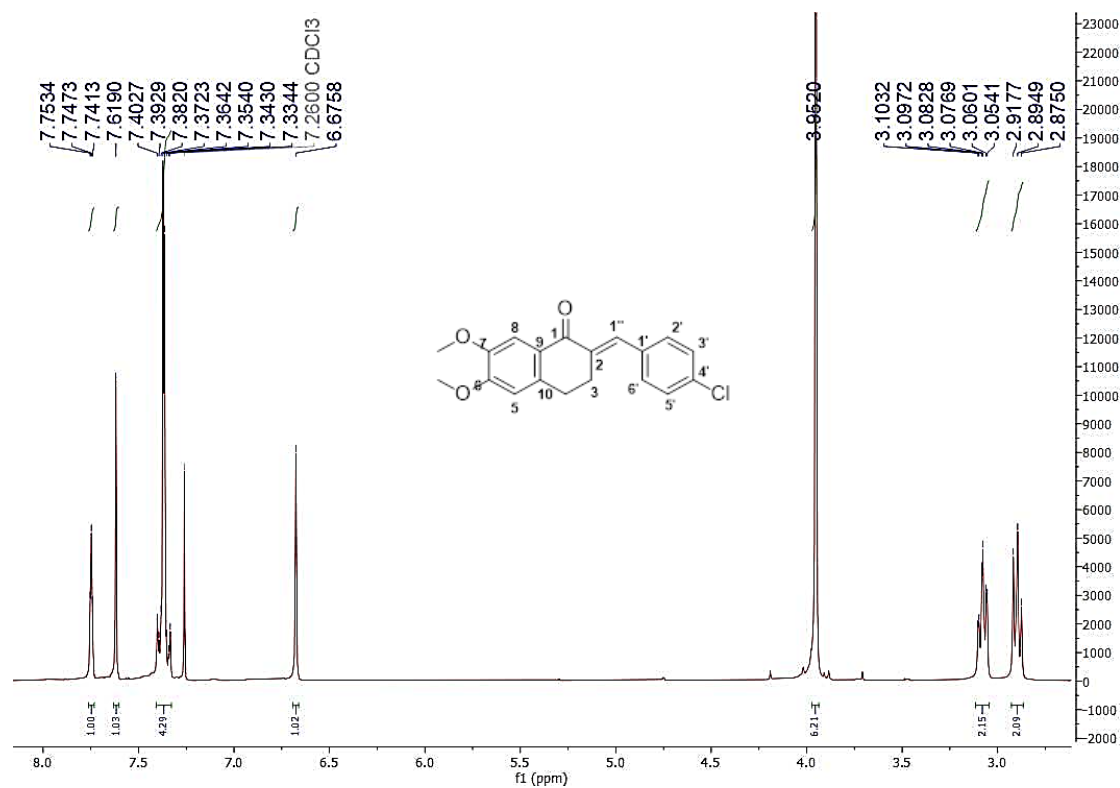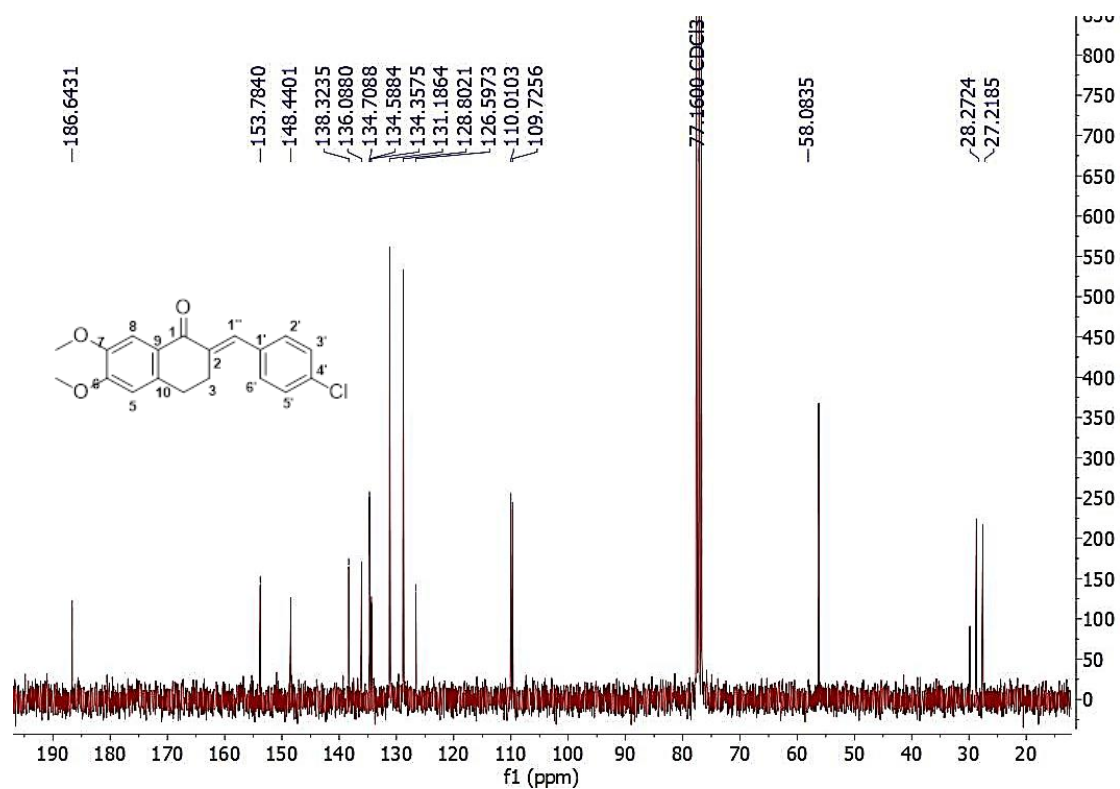

Figure S12. <sup>1</sup>H and <sup>13</sup>C NMR of compound 14.

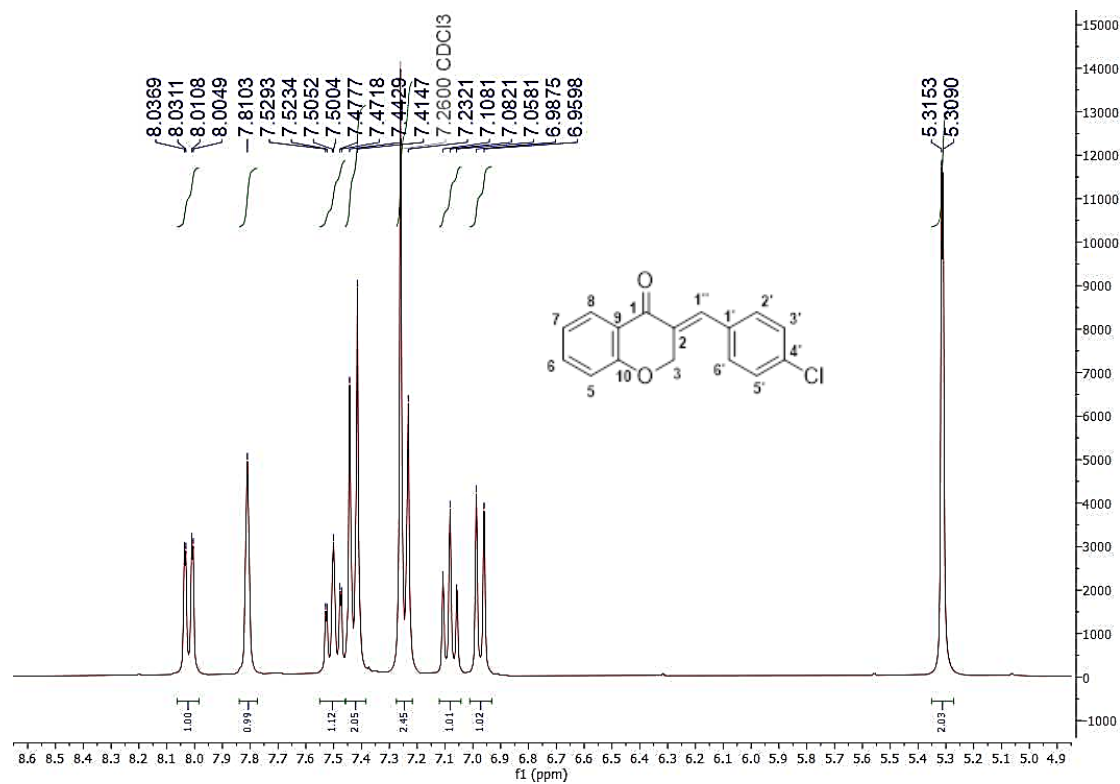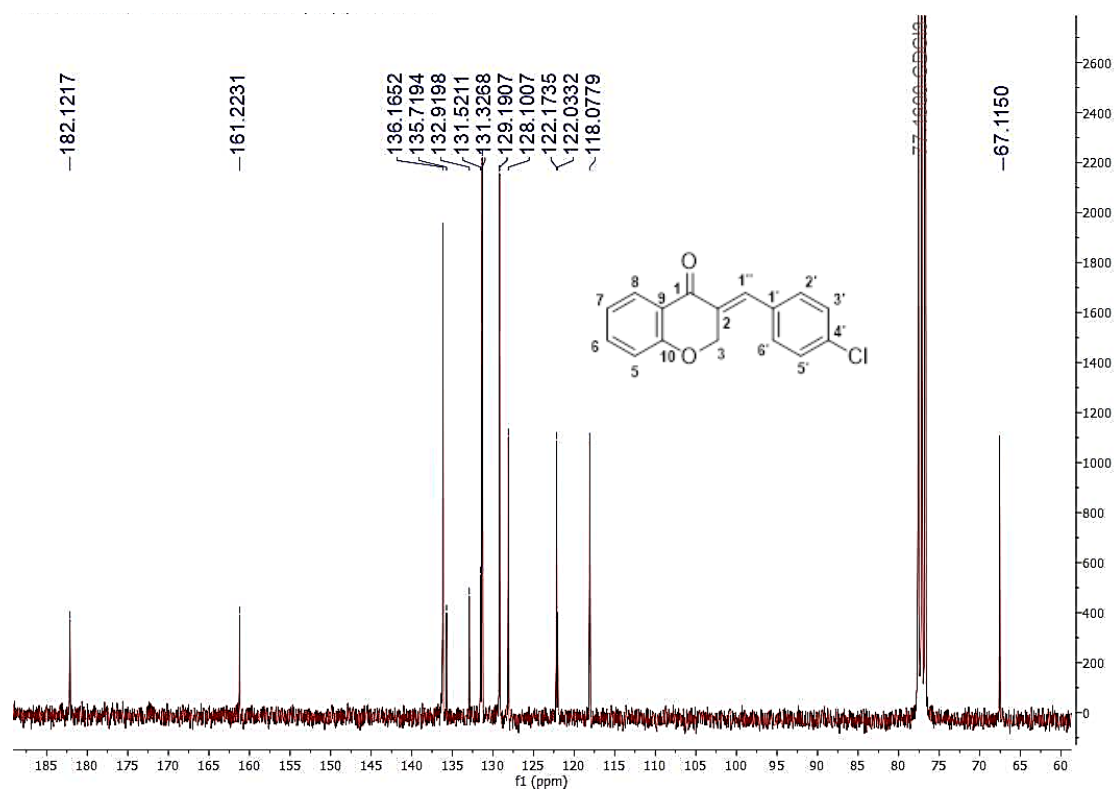Figure S13. <sup>1</sup>H and <sup>13</sup>C NMR of compound 15.

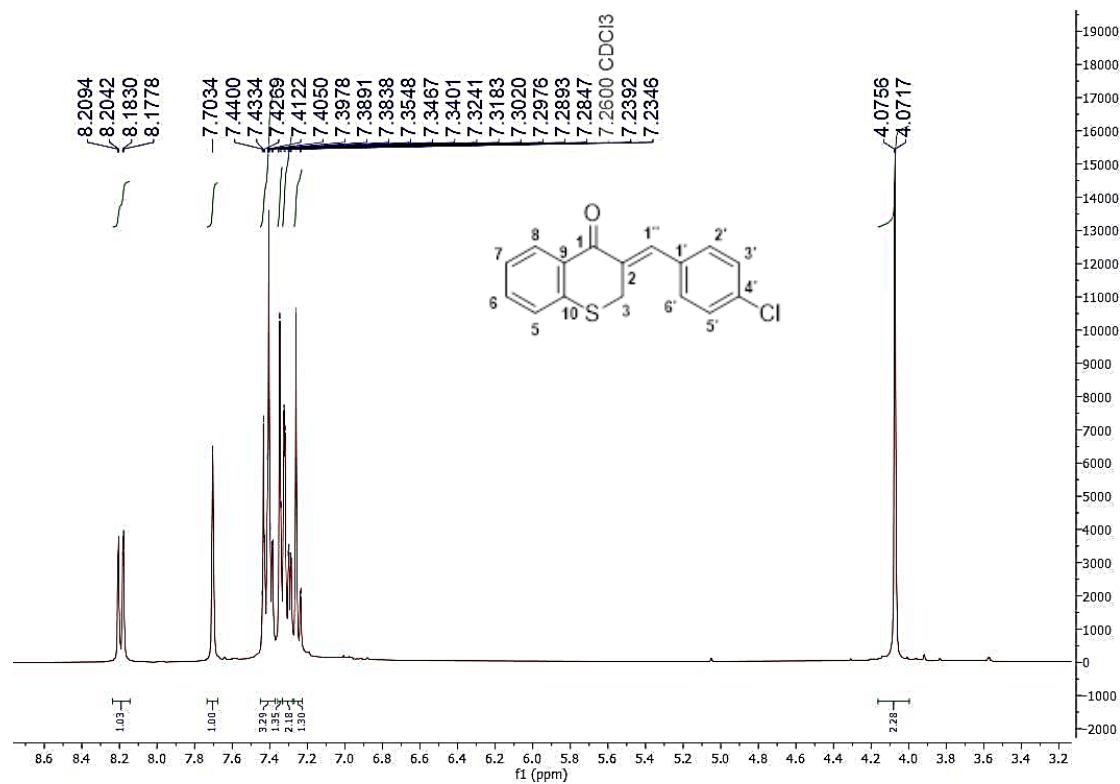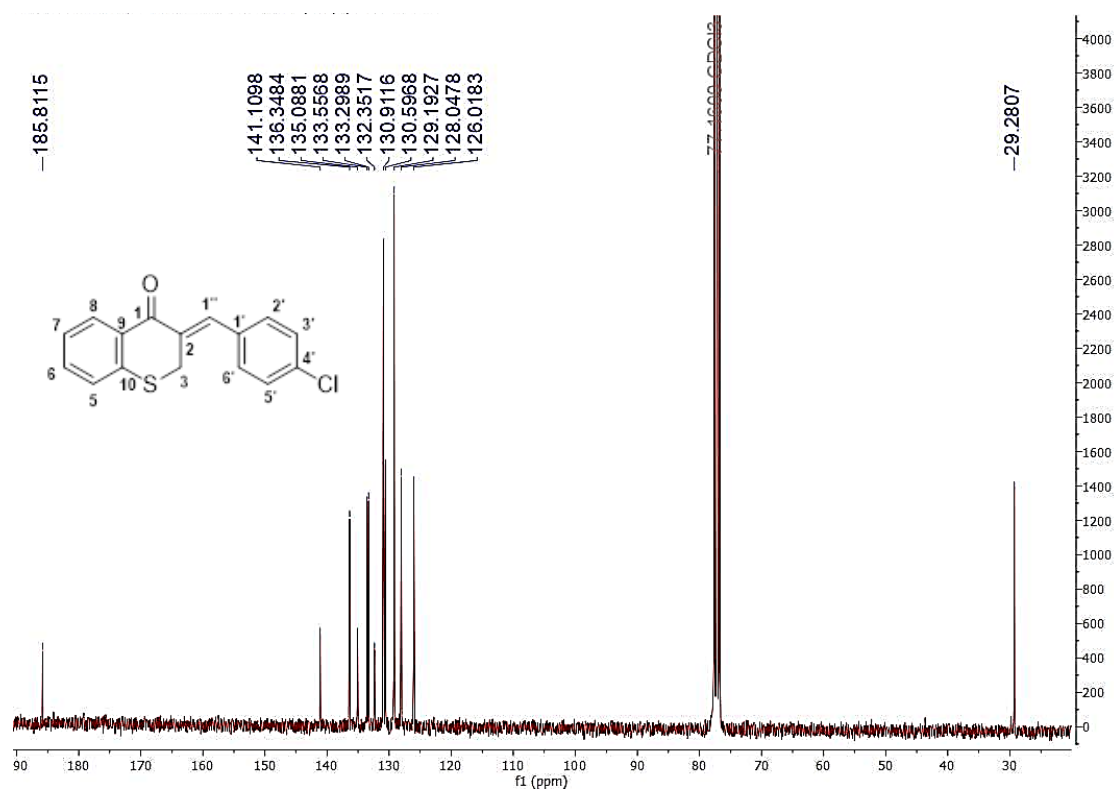

Figure S14. <sup>1</sup>H and <sup>13</sup>C NMR of compound 16.

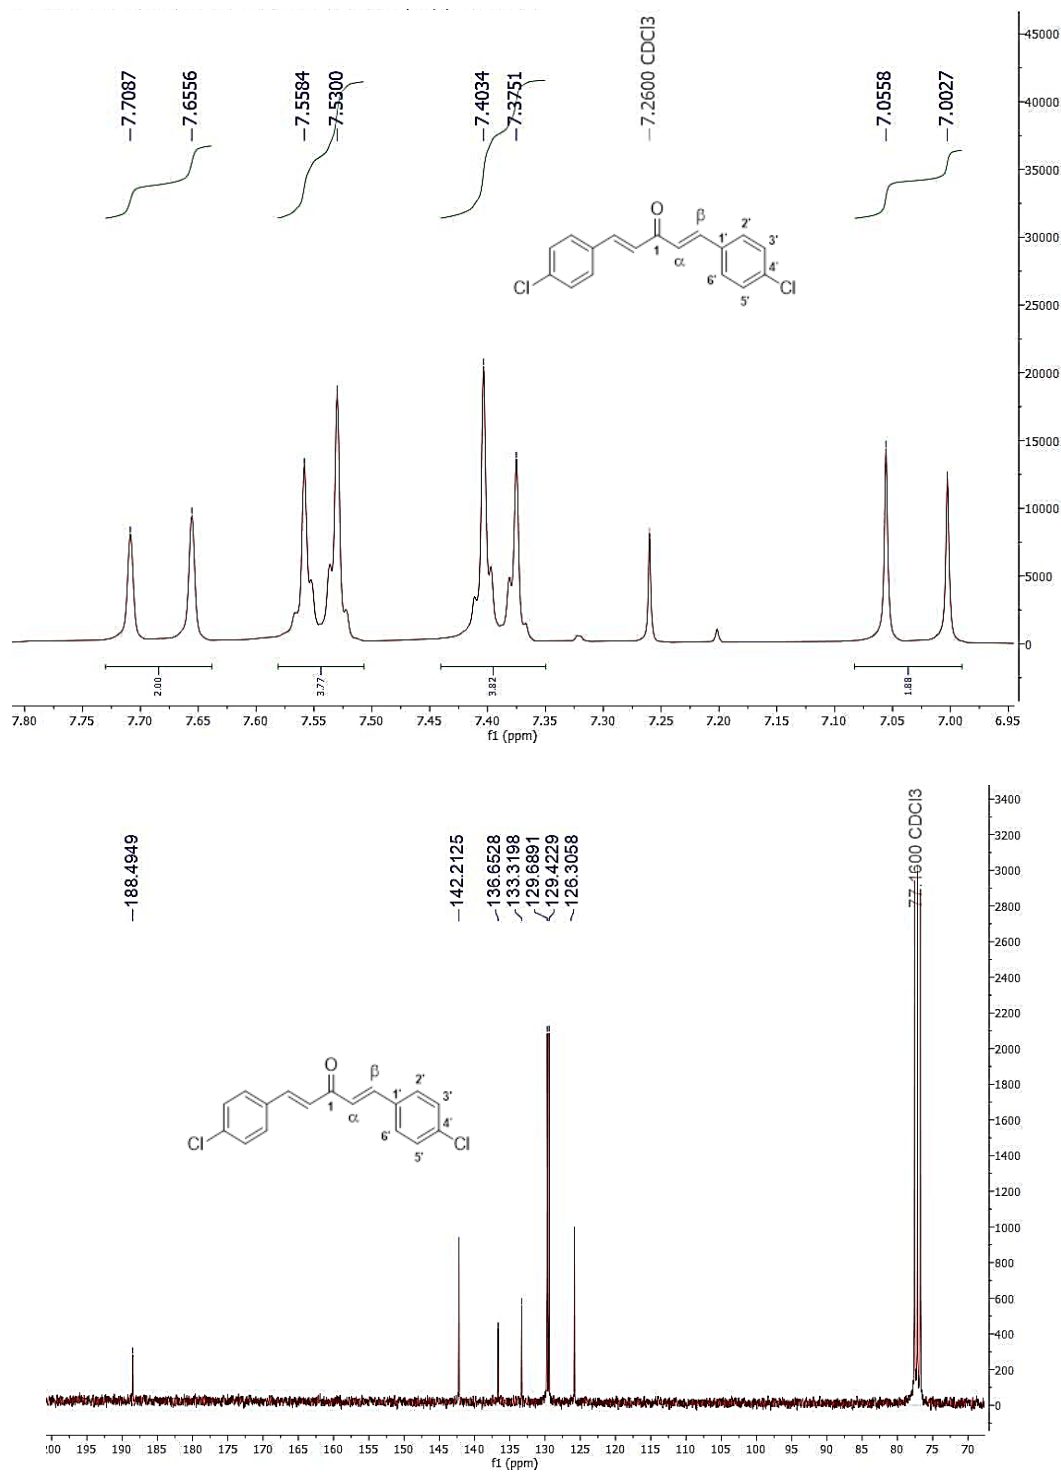

Figure S15.  $^1\text{H}$  and  $^{13}\text{C}$  NMR of compound 17.

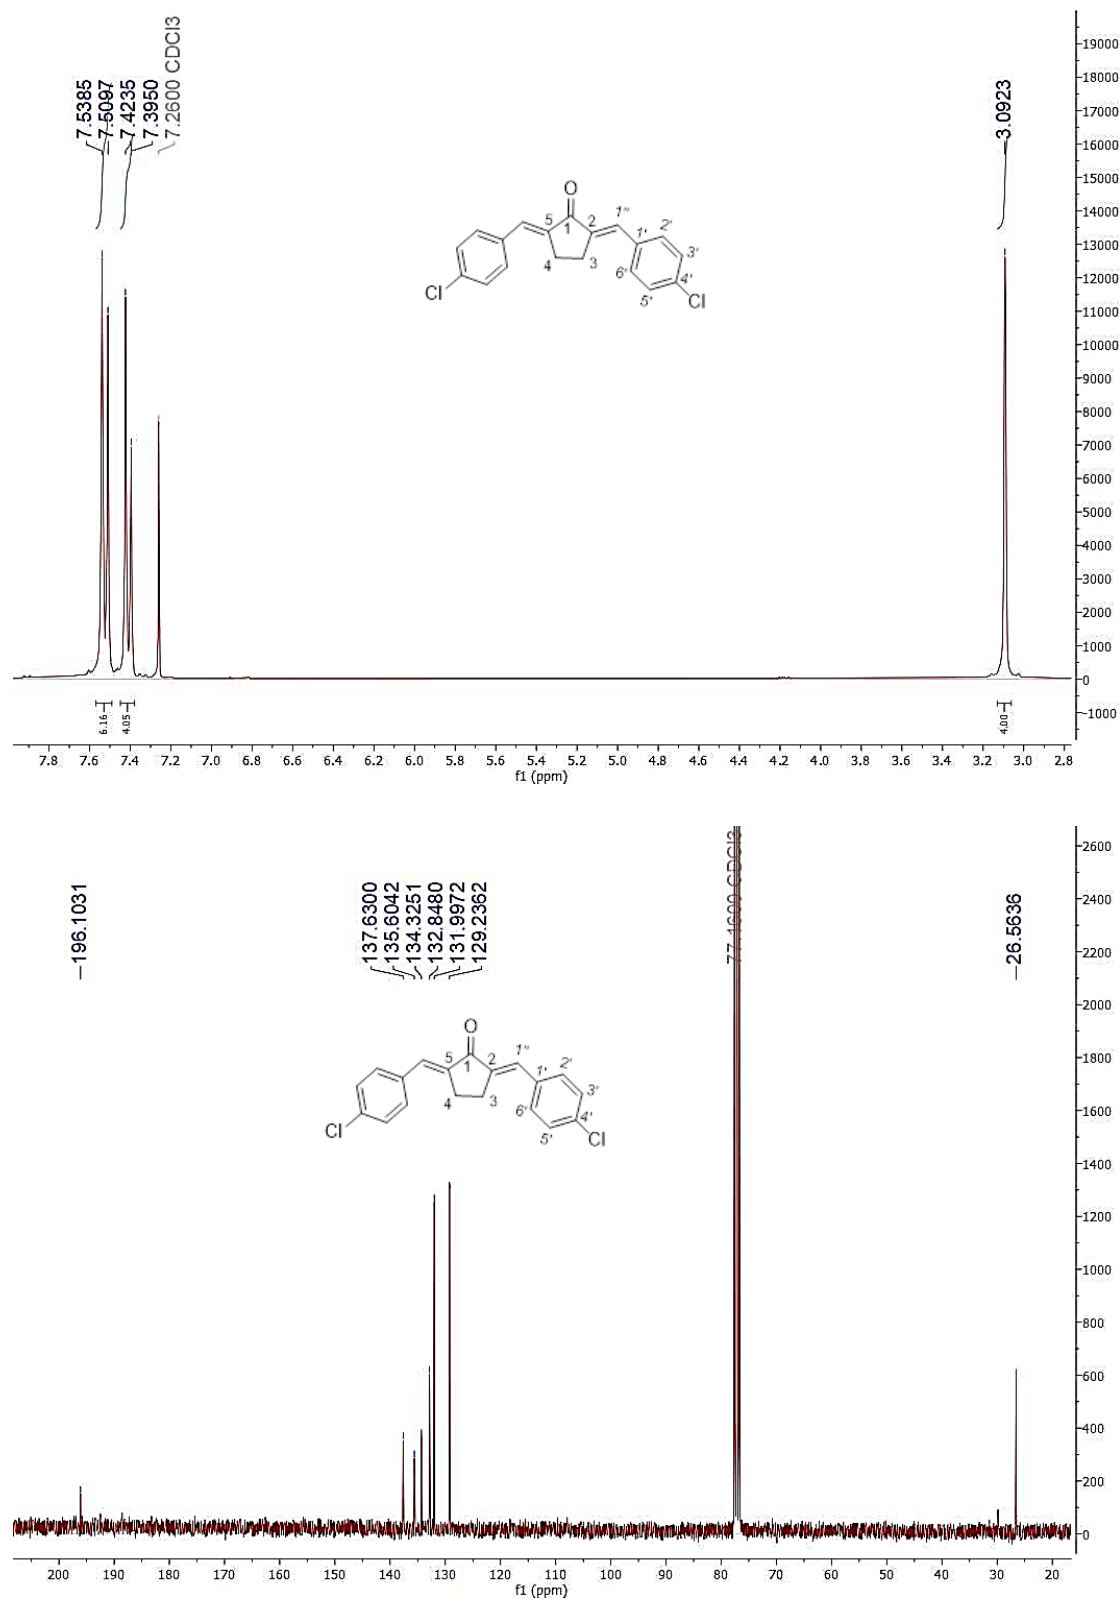Figure S16.  $^1\text{H}$  and  $^{13}\text{C}$  NMR of compound 18.

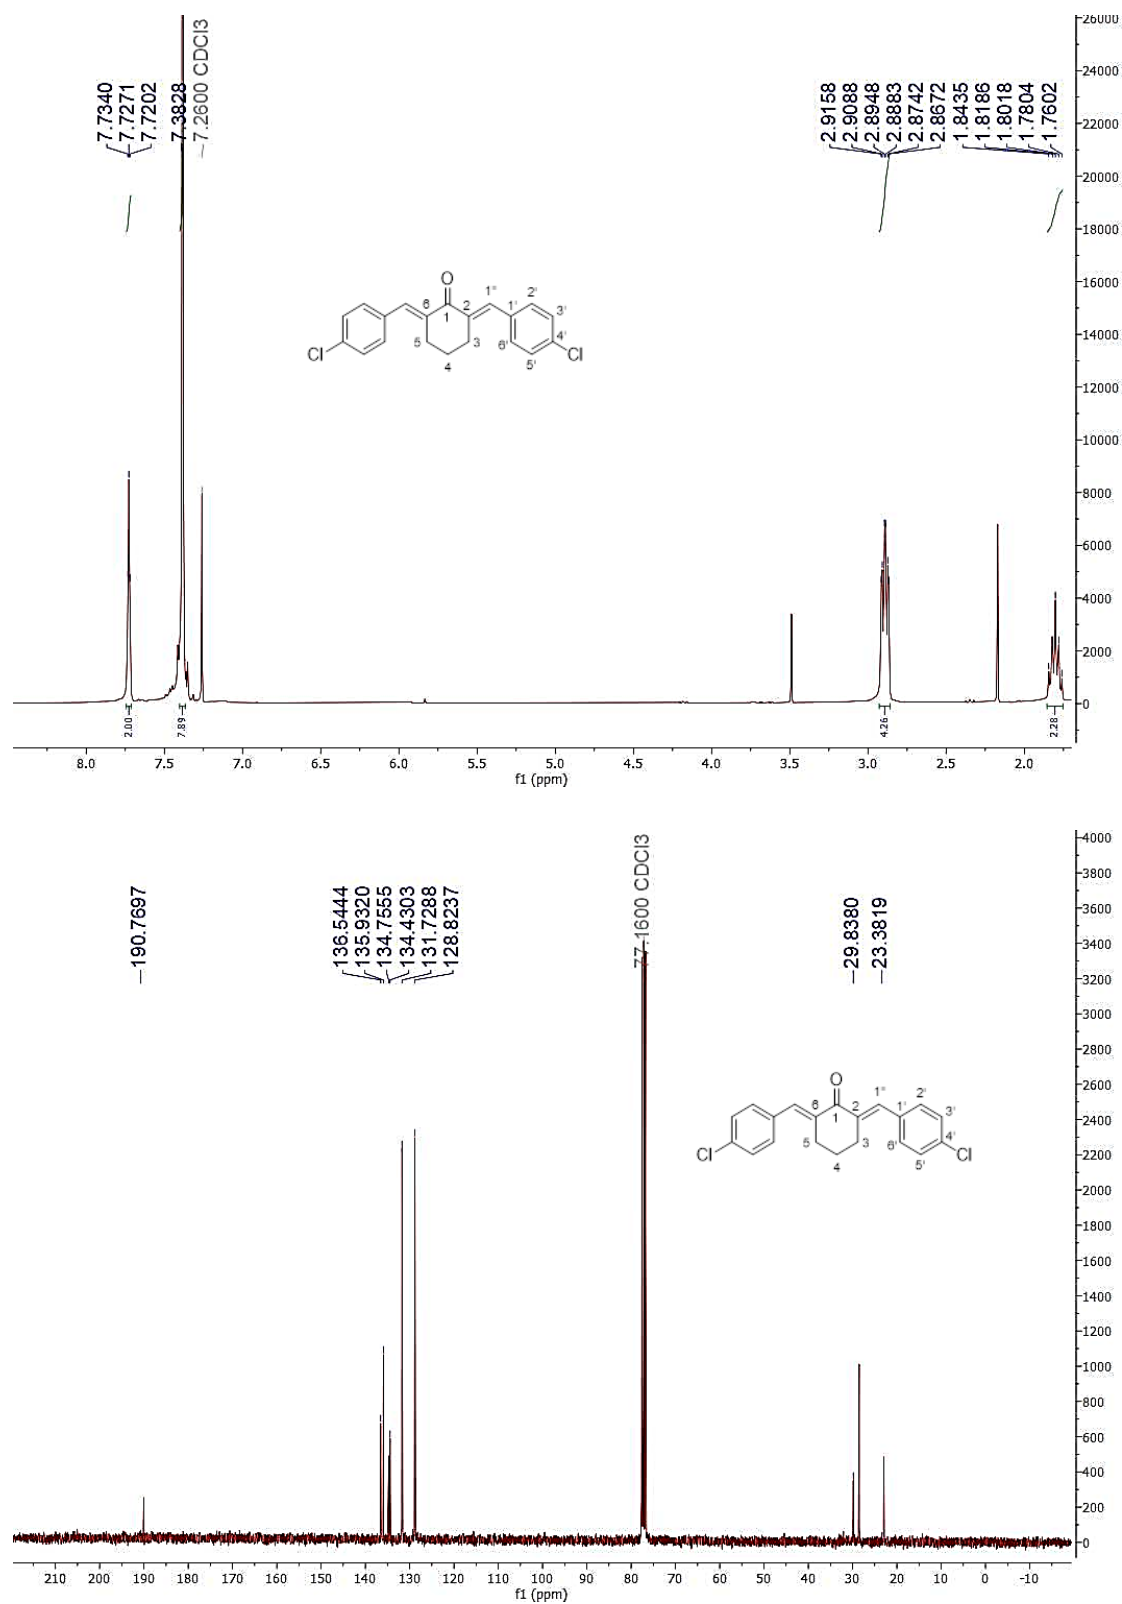

Figure S17. <sup>1</sup>H and <sup>13</sup>C NMR of compound 19.

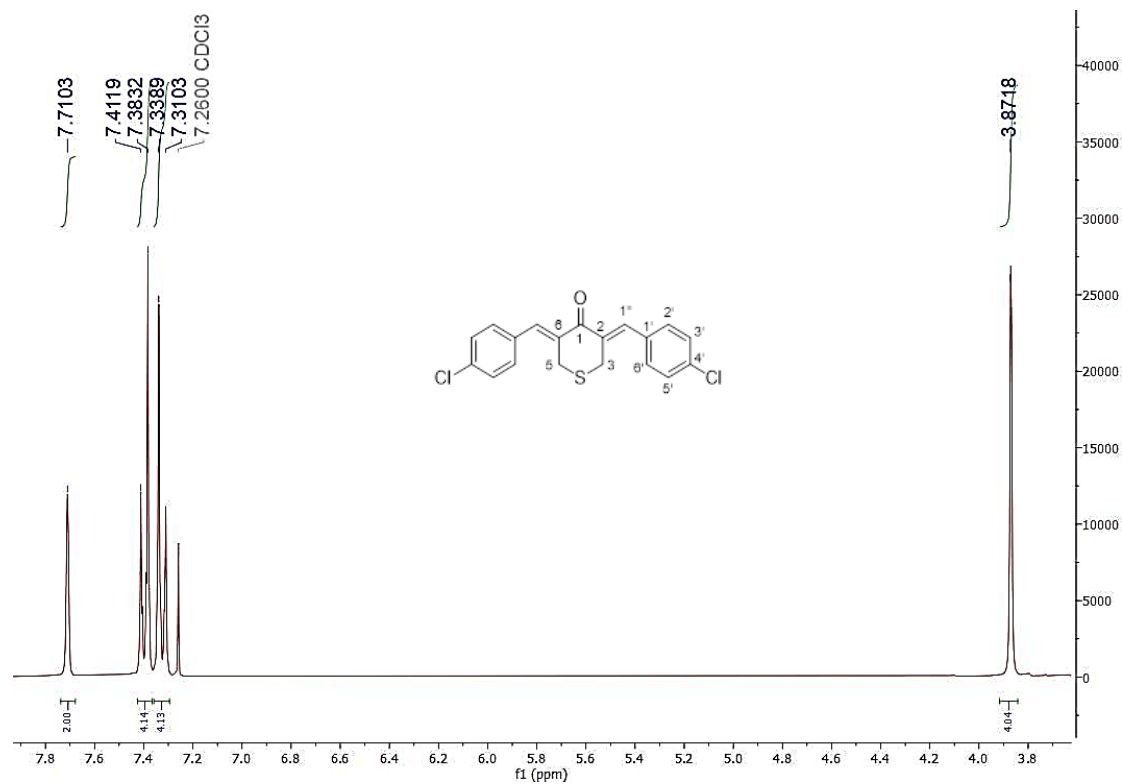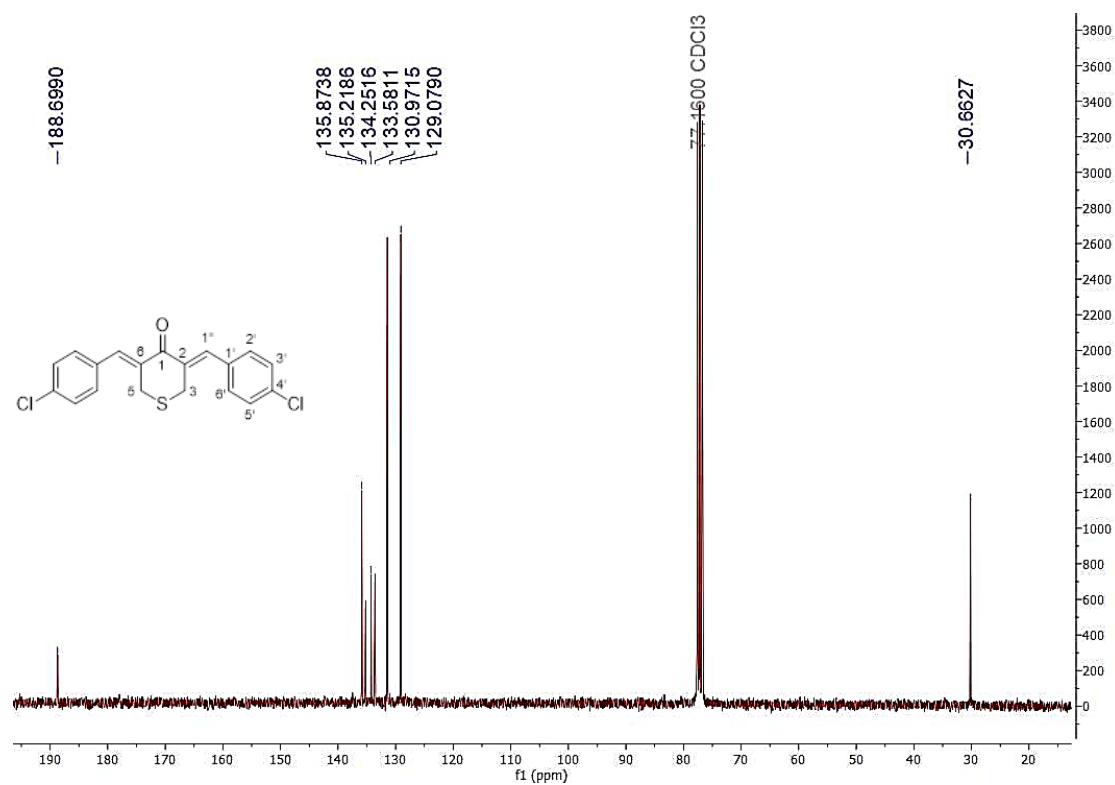

Figure S18. <sup>1</sup>H and <sup>13</sup>C NMR of compound 20.

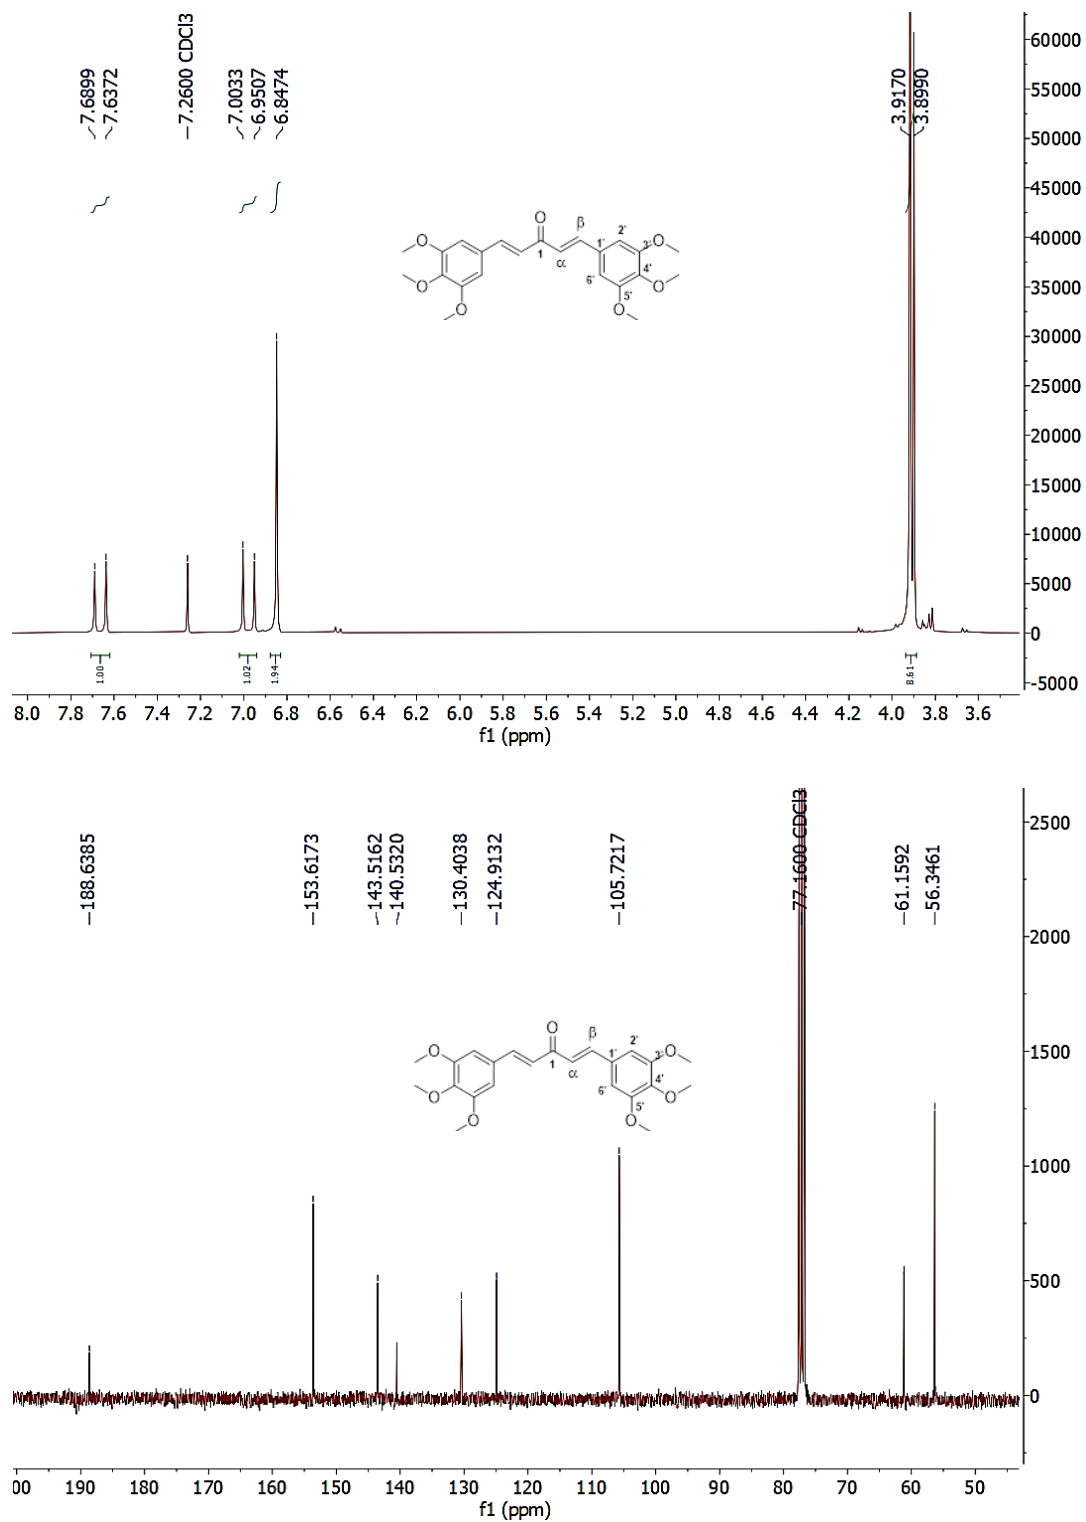

Figure S19. <sup>1</sup>H and <sup>13</sup>C NMR of compound 21.



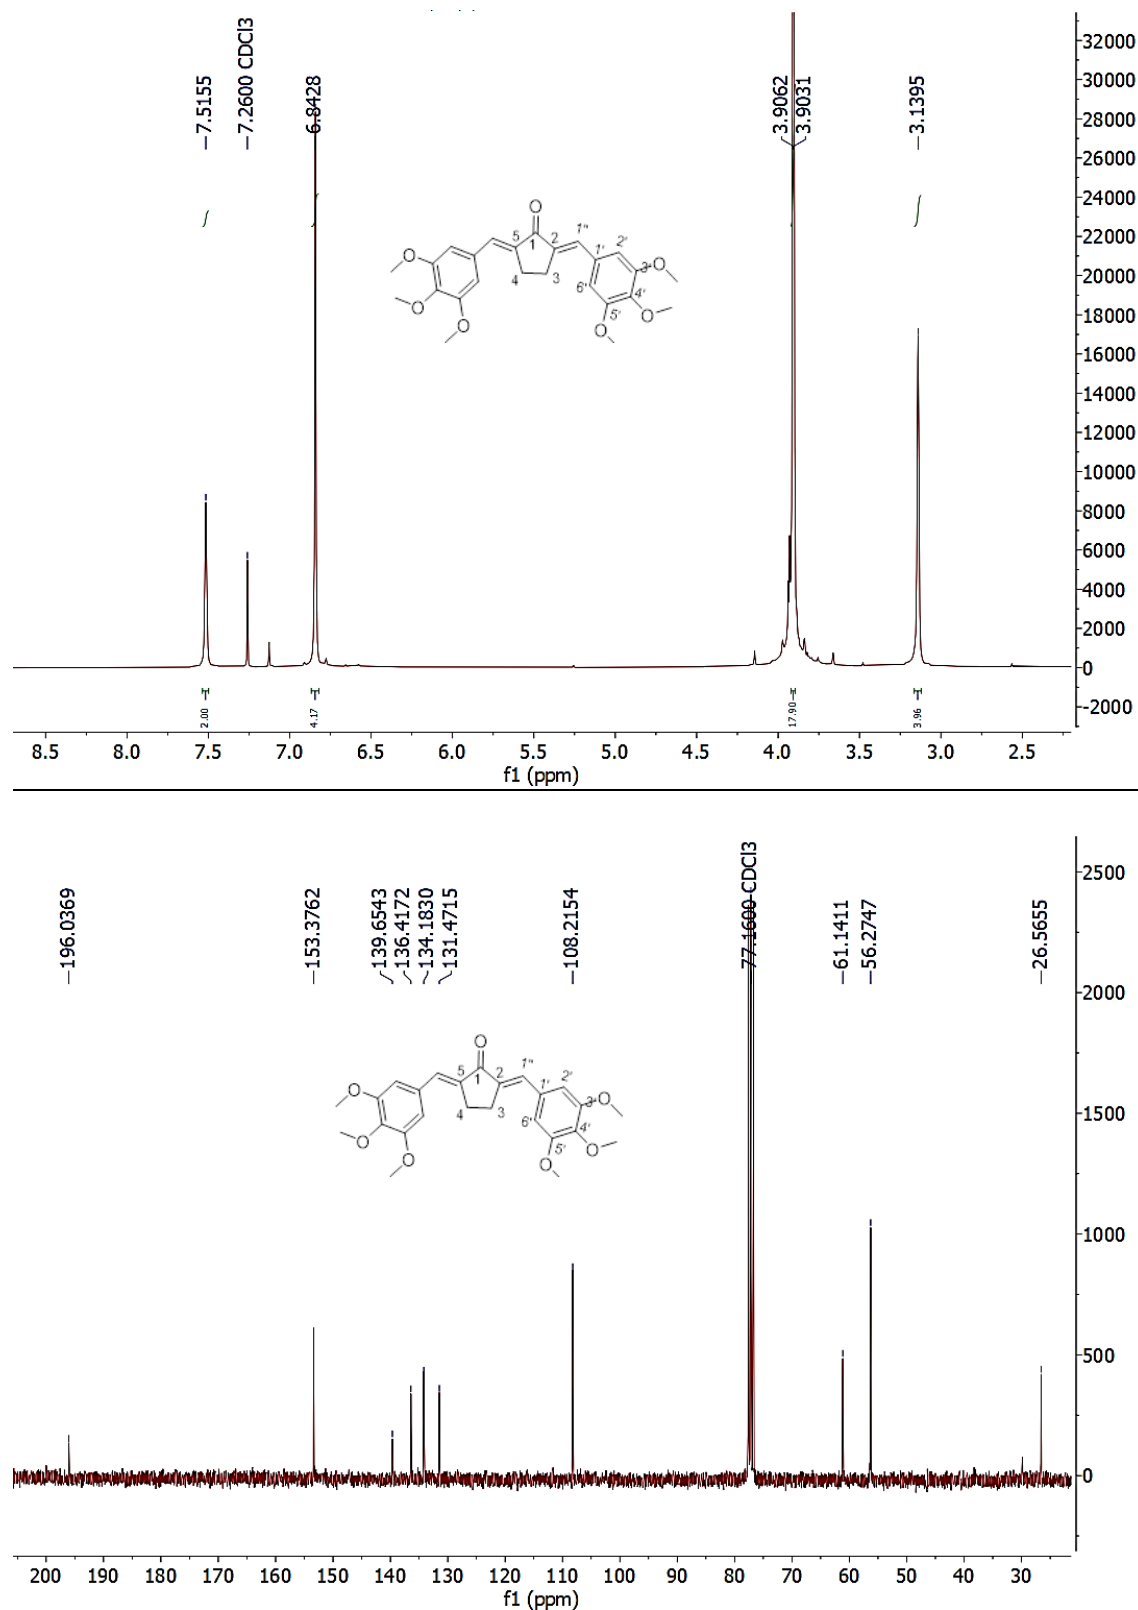

Figure S20. <sup>1</sup>H and <sup>13</sup>C NMR of compound 22

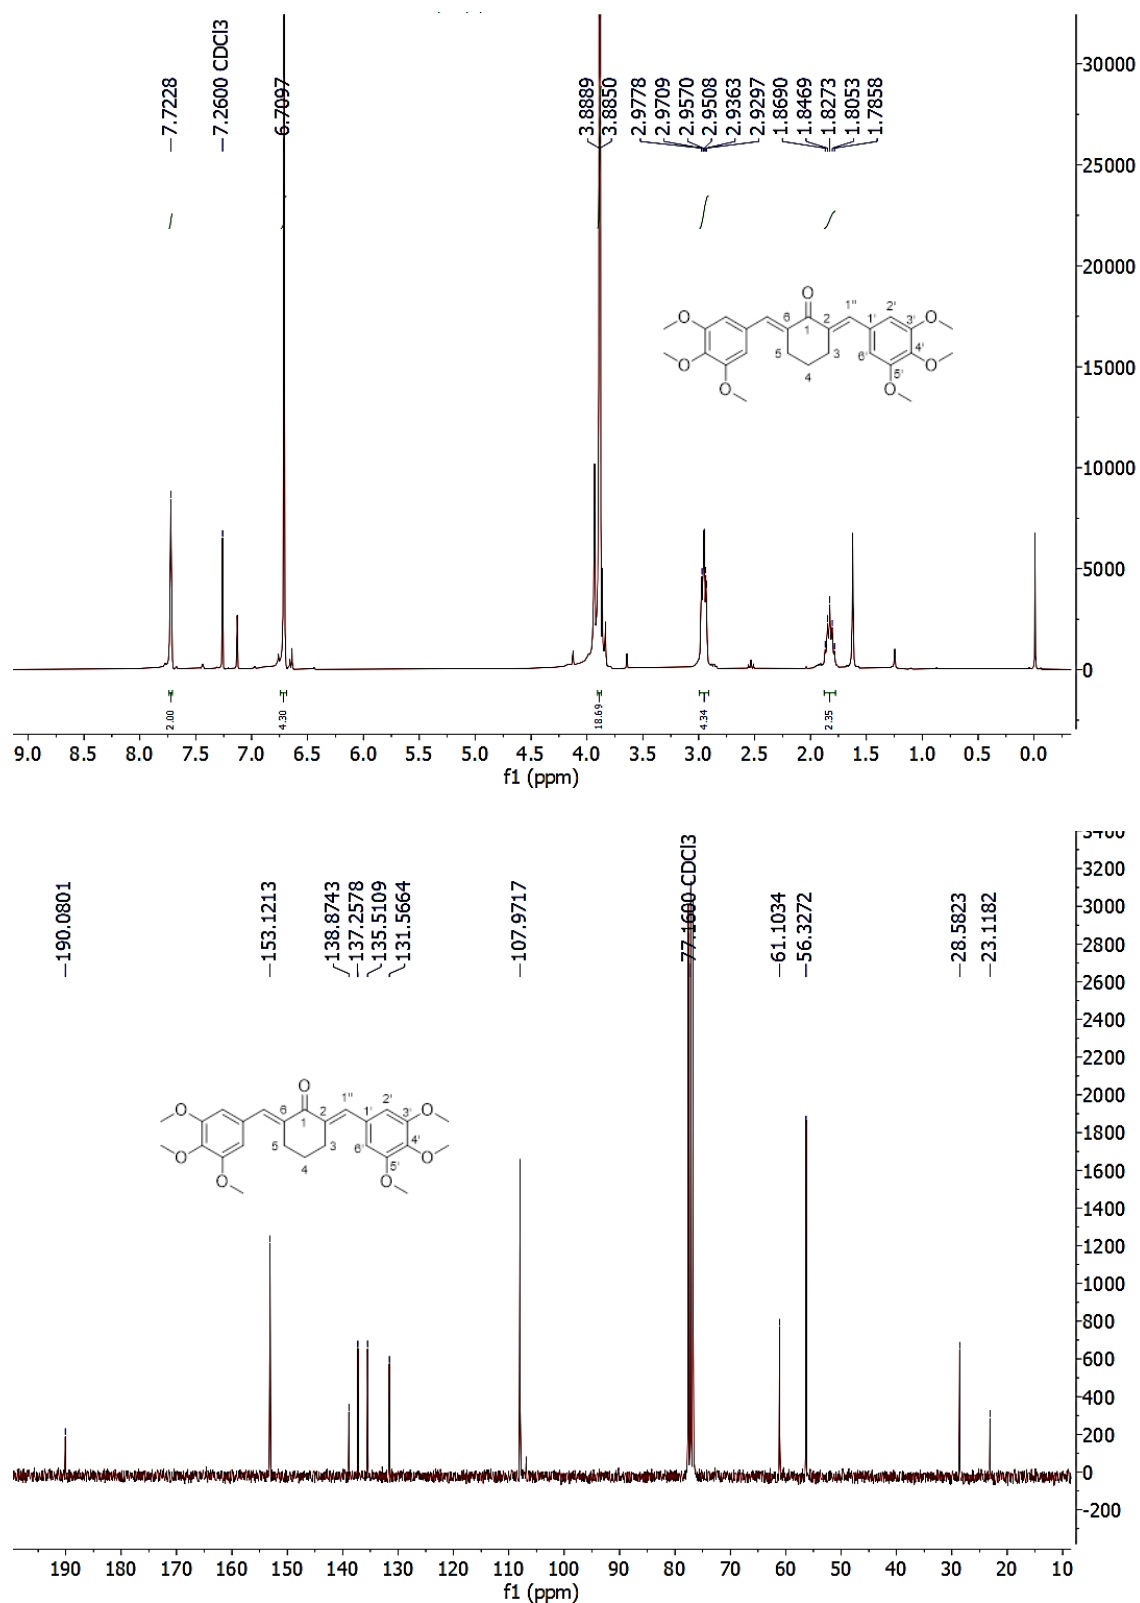

Figure S21. <sup>1</sup>H and <sup>13</sup>C NMR of compound 23.

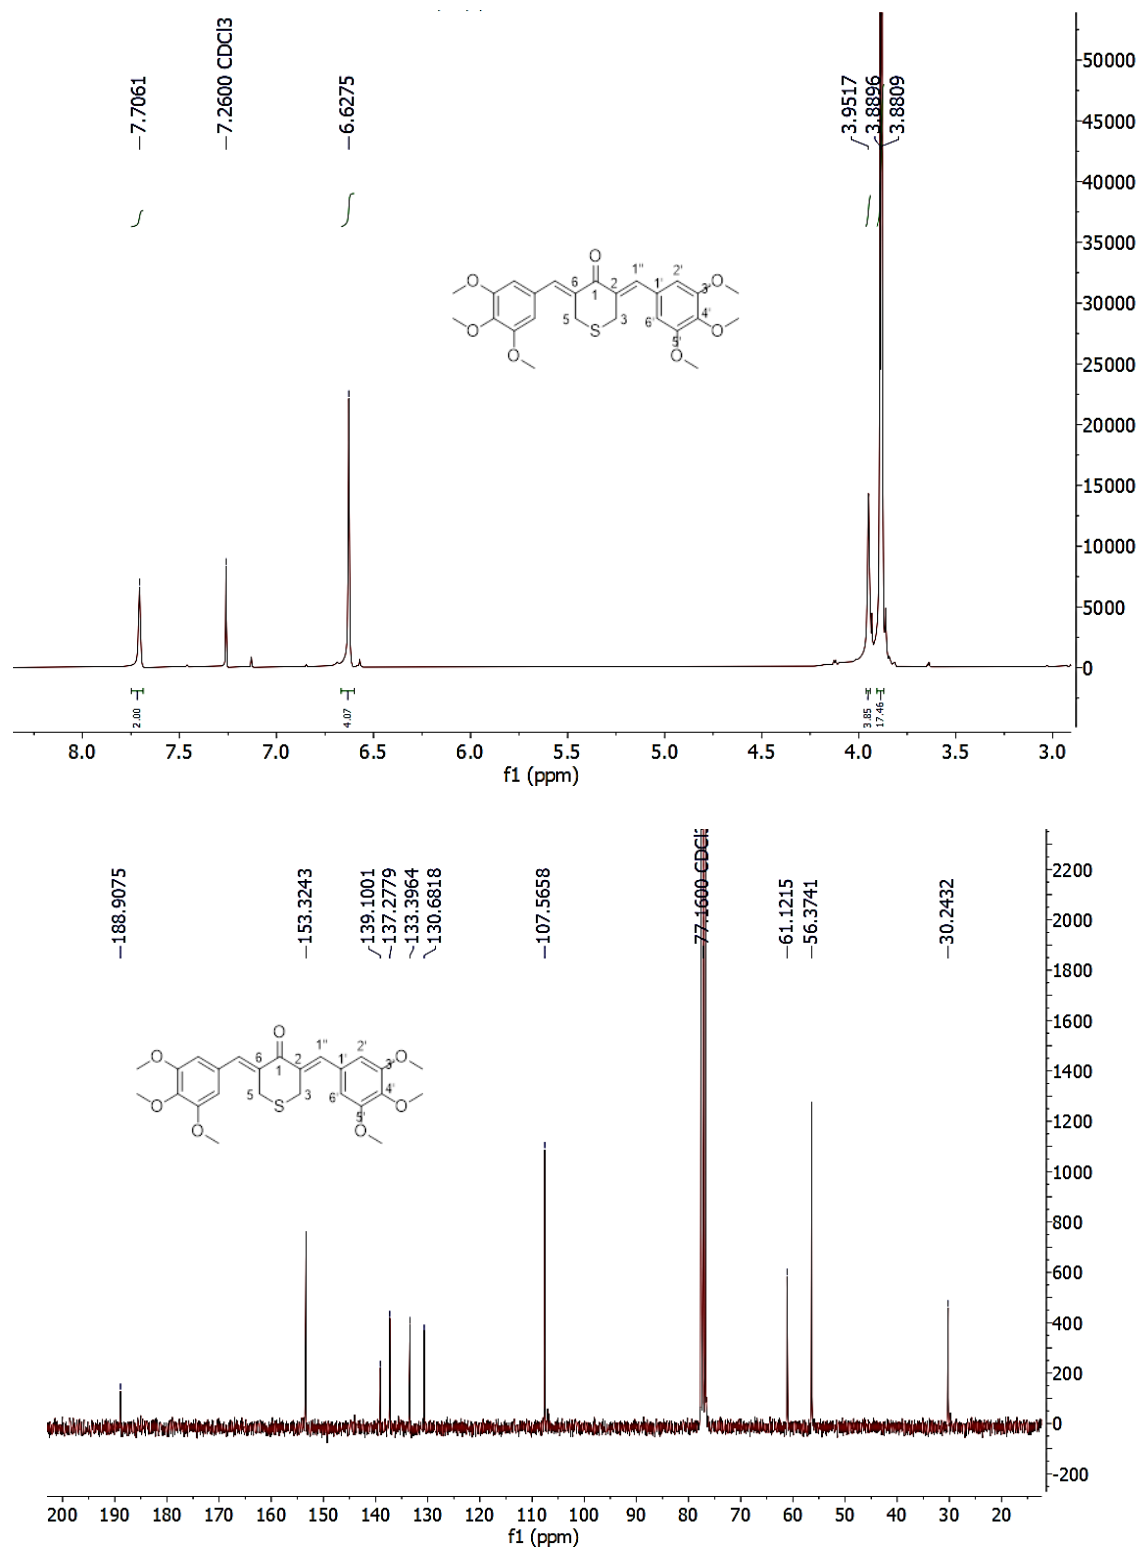

Figure S22. <sup>1</sup>H and <sup>13</sup>C NMR of compound 24.

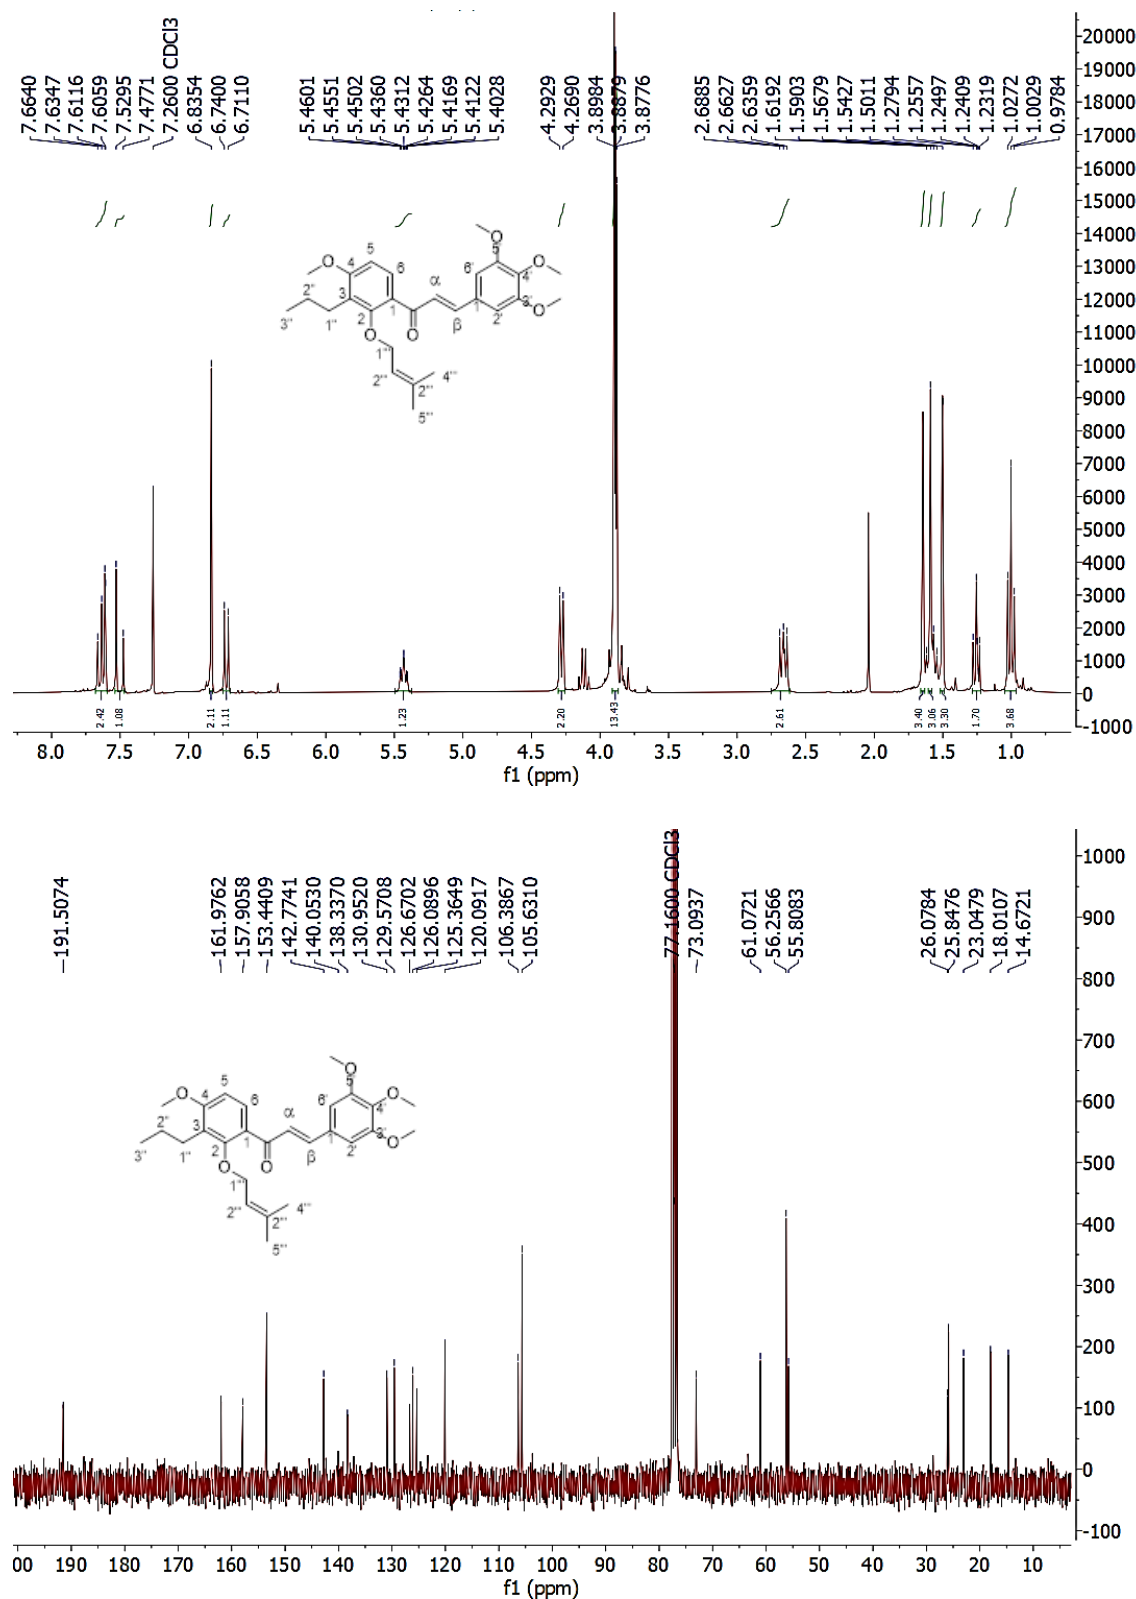

**Figure S23.**  $^1\text{H}$  and  $^{13}\text{C}$  NMR of compound **26**.

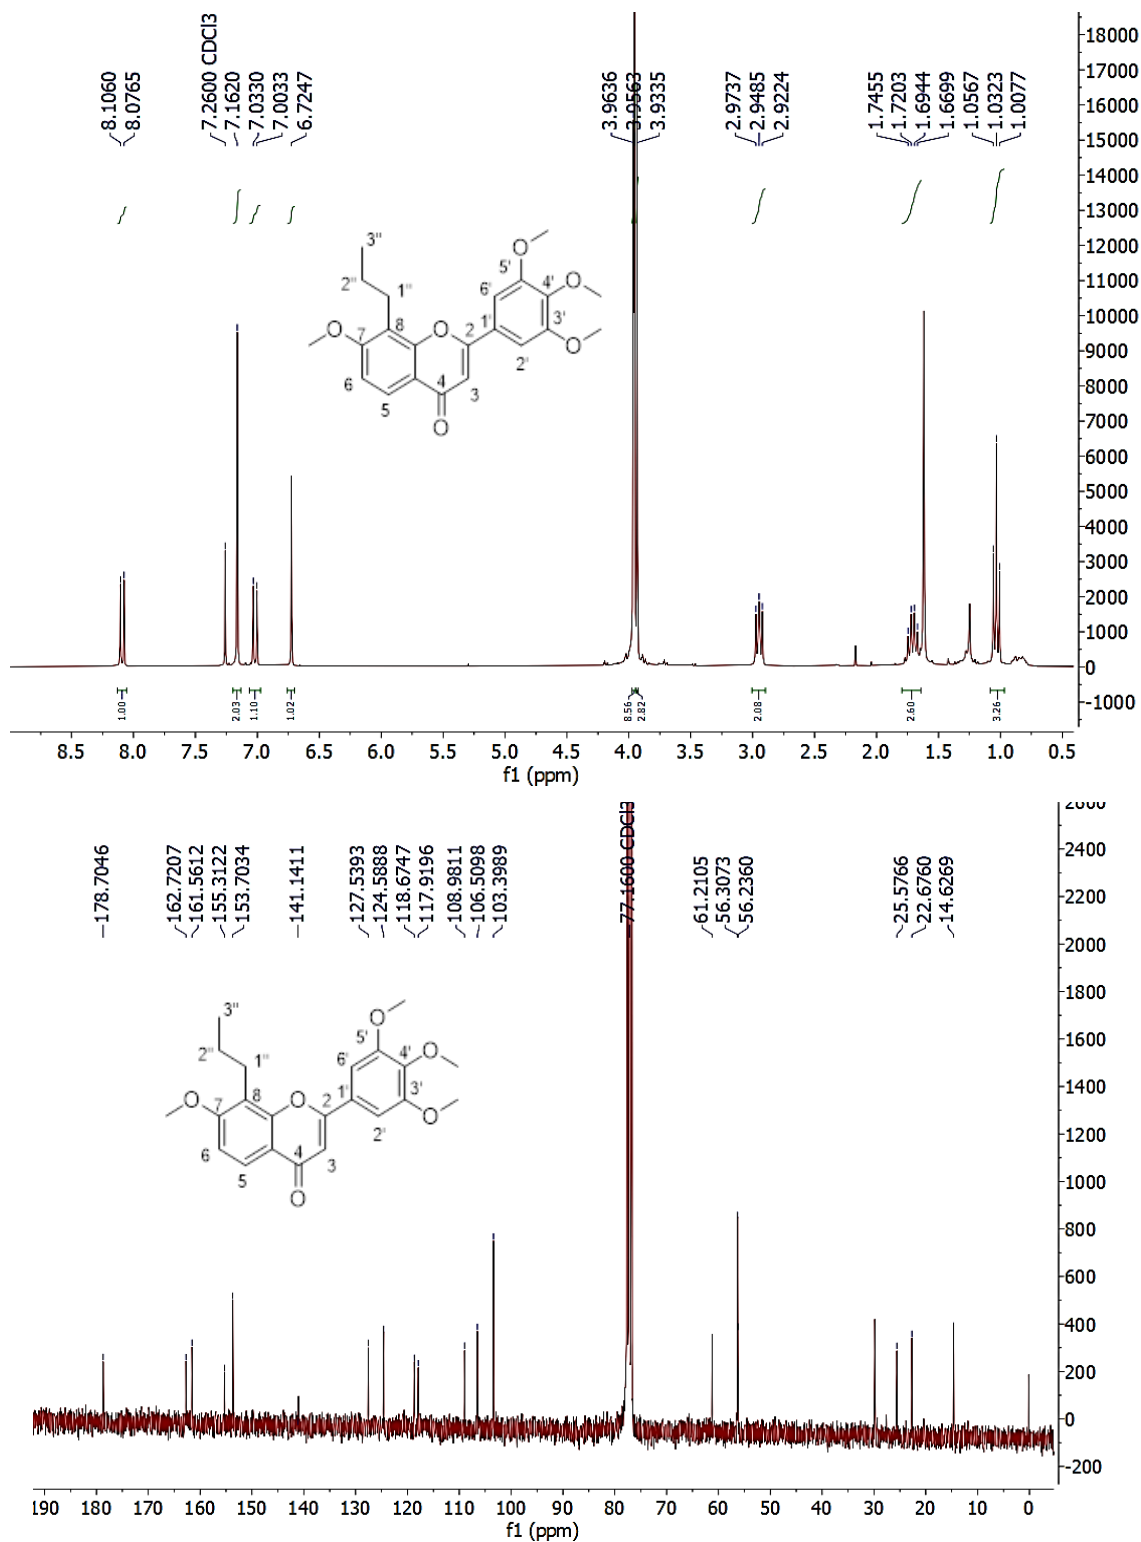Figure S24. <sup>1</sup>H and <sup>13</sup>C NMR of compound 27.

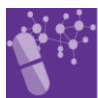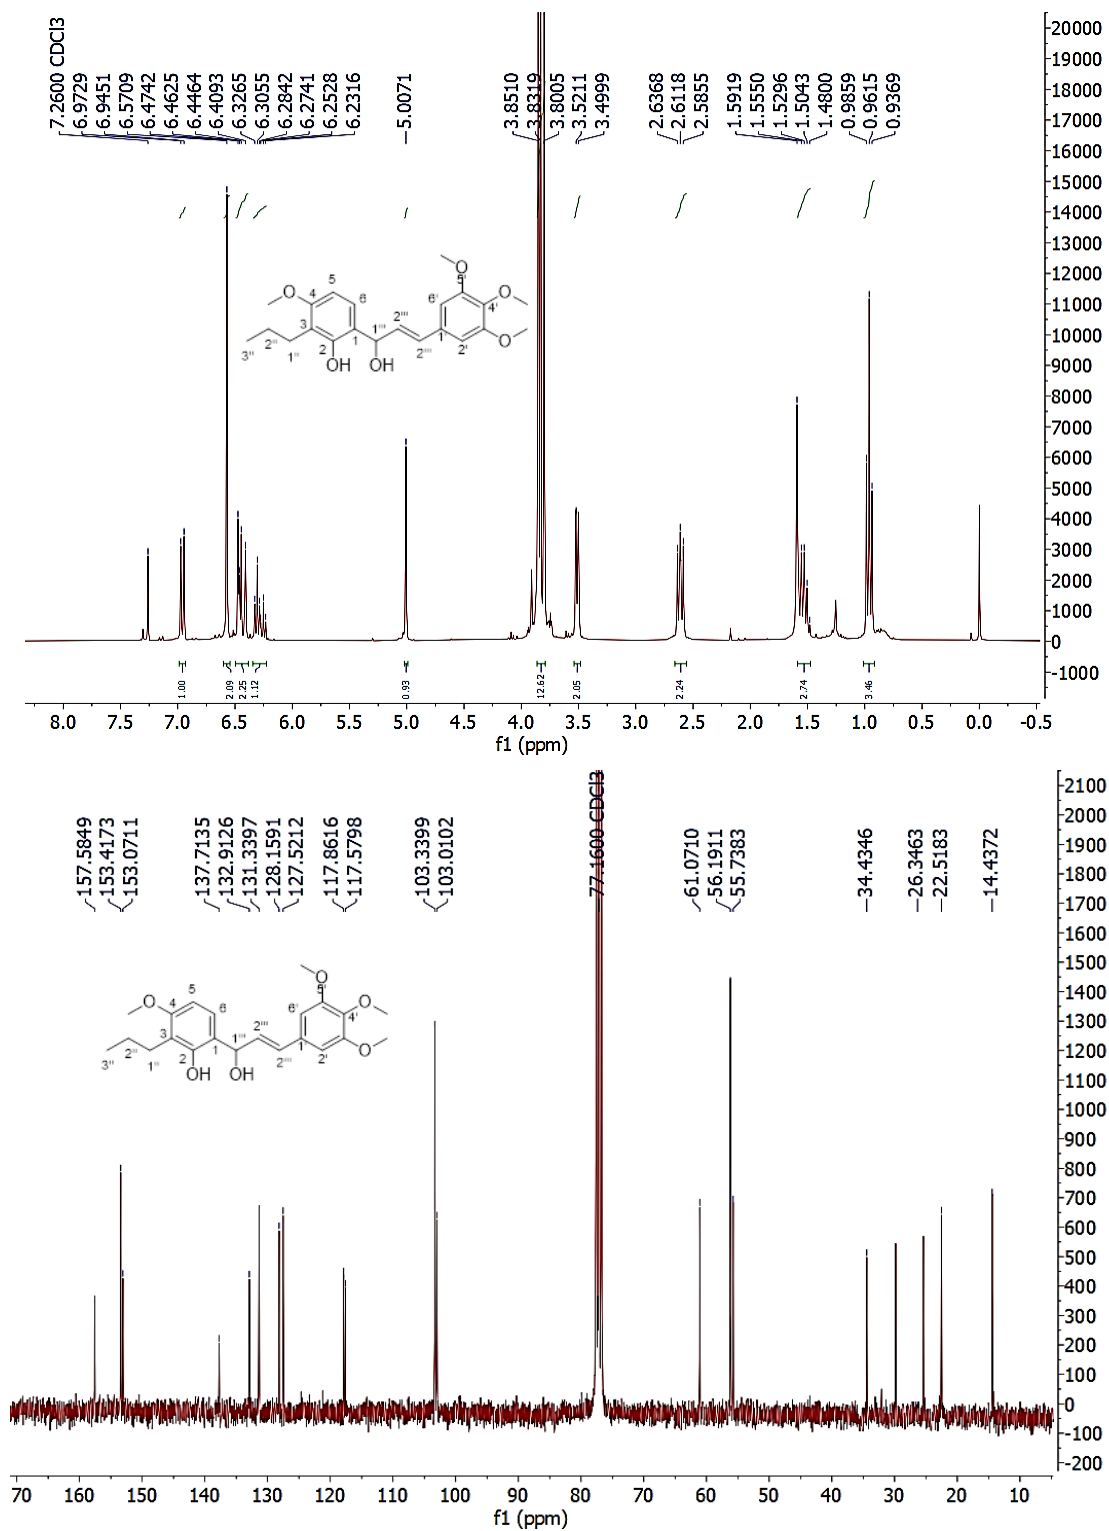Figure S25. <sup>1</sup>H and <sup>13</sup>C NMR of compound 28.

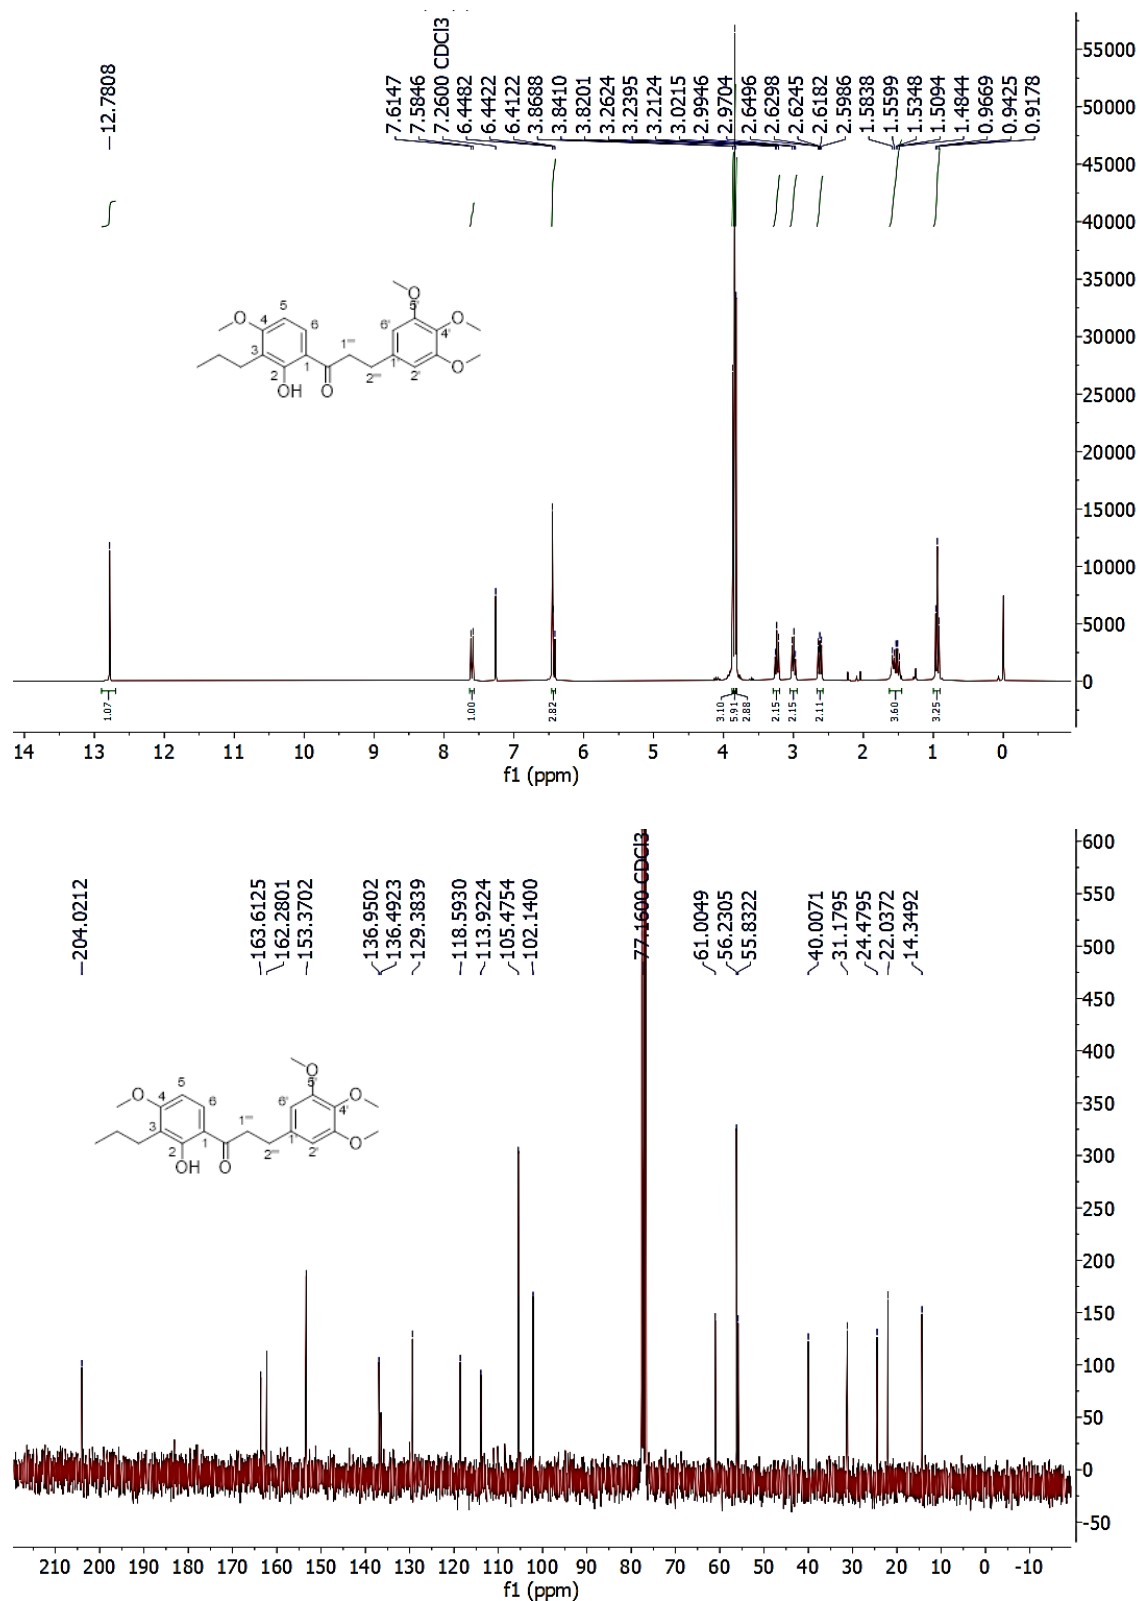Figure S26. <sup>1</sup>H and <sup>13</sup>C NMR of compound 29.

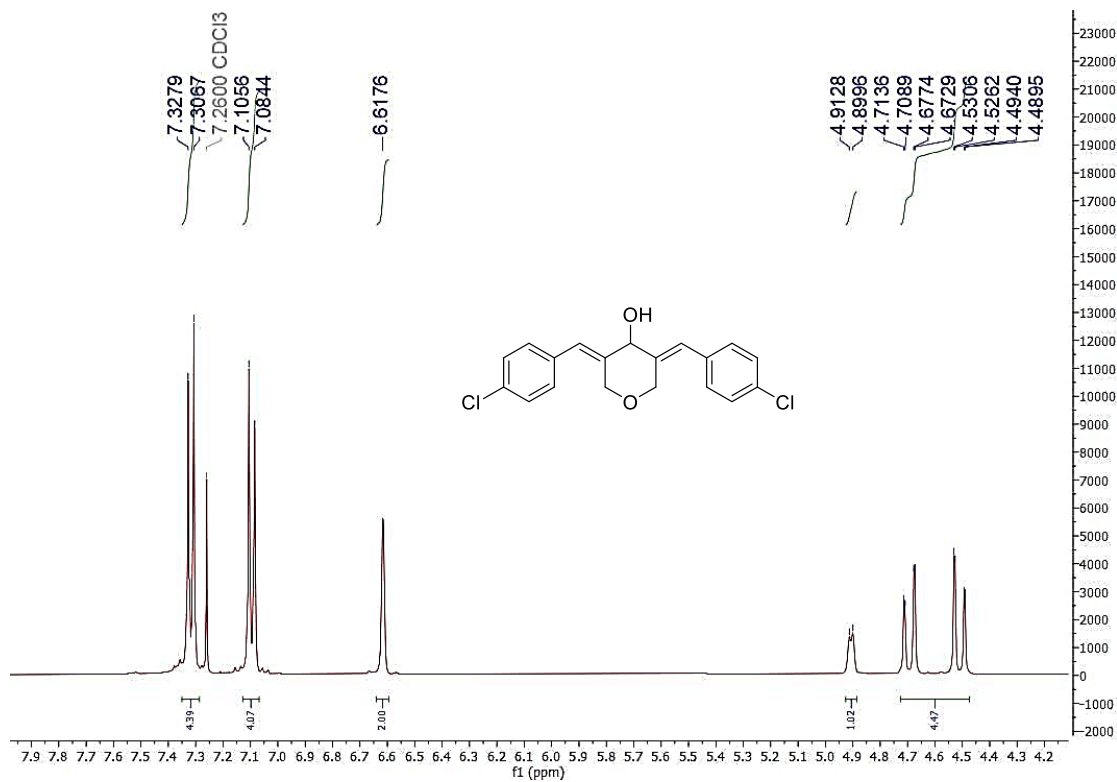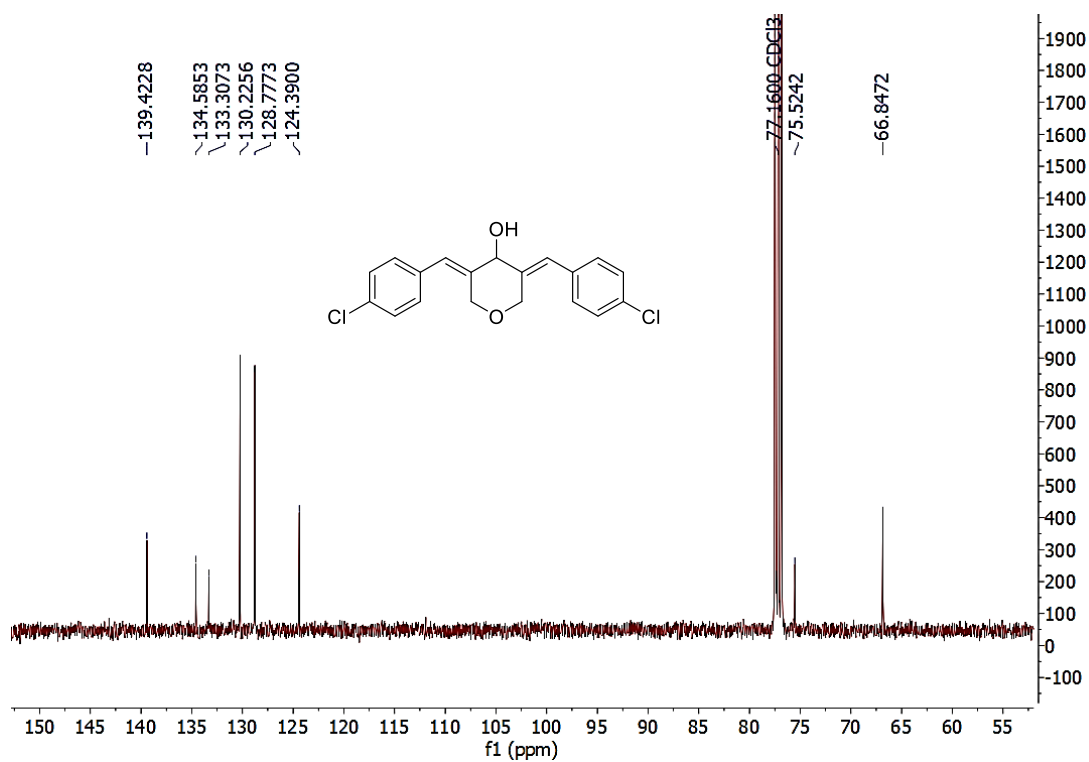

Figure S27. <sup>1</sup>H and <sup>13</sup>C NMR of compound 30.



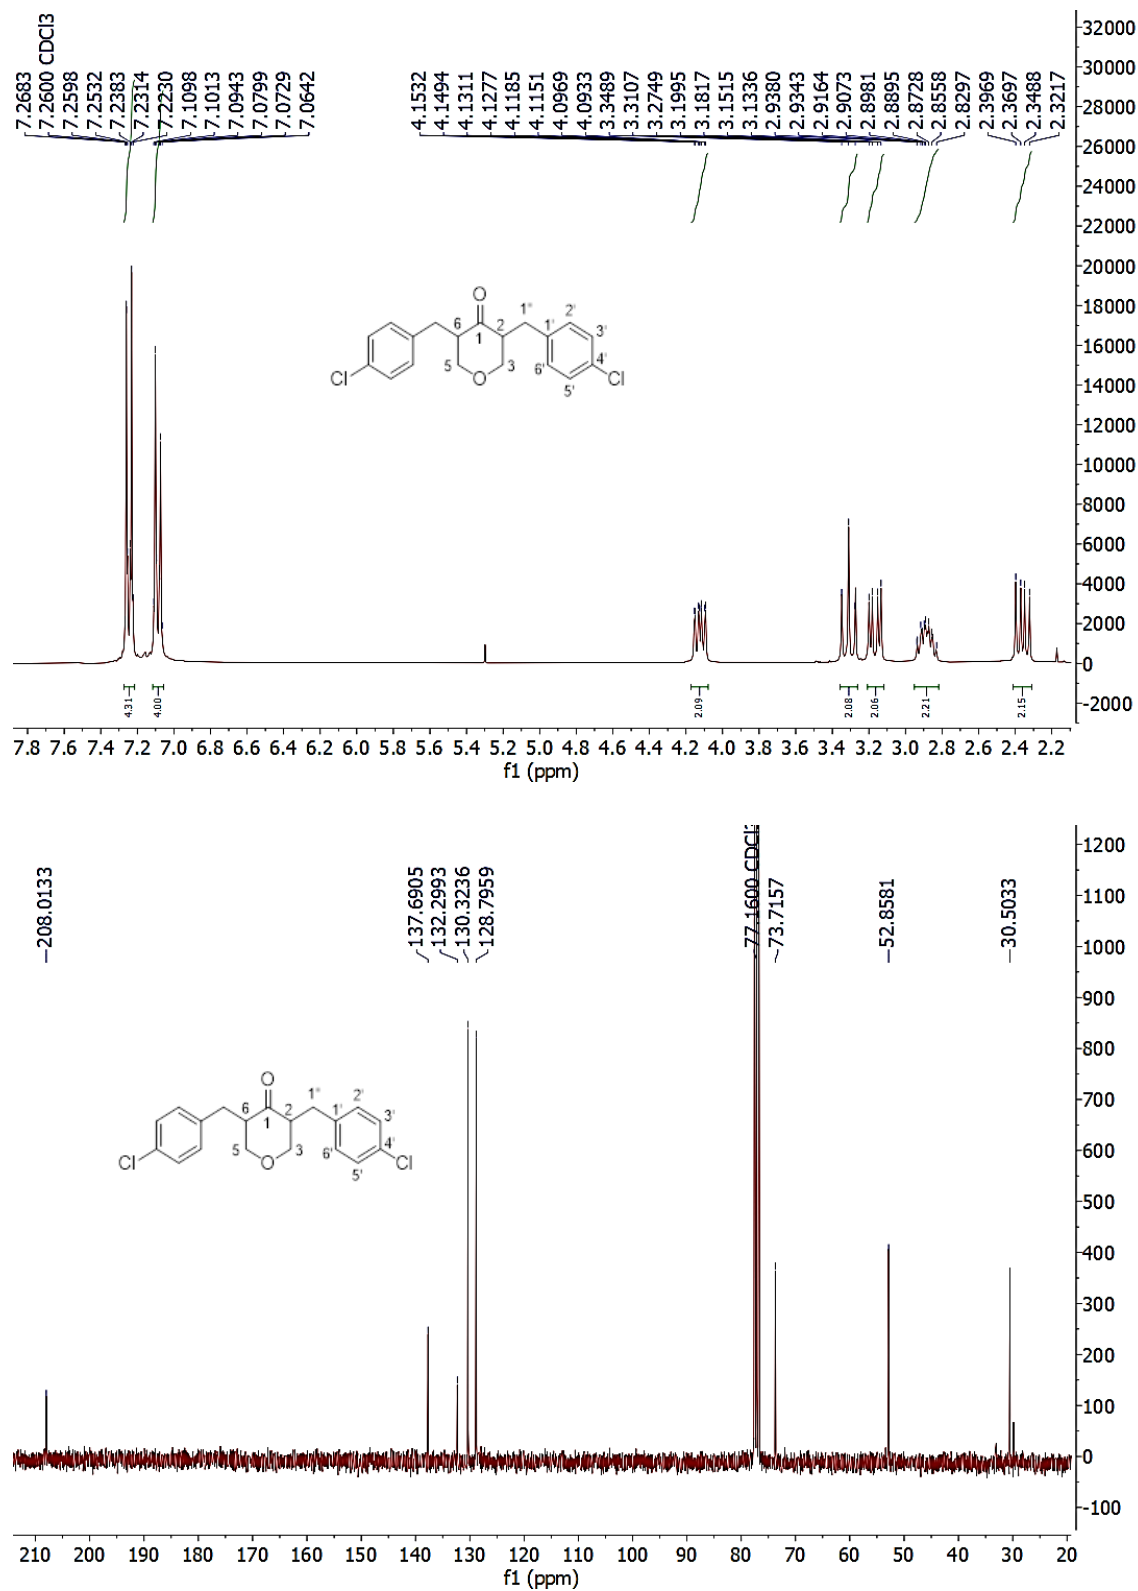

Figure S28. <sup>1</sup>H and <sup>13</sup>C NMR of compound 31.

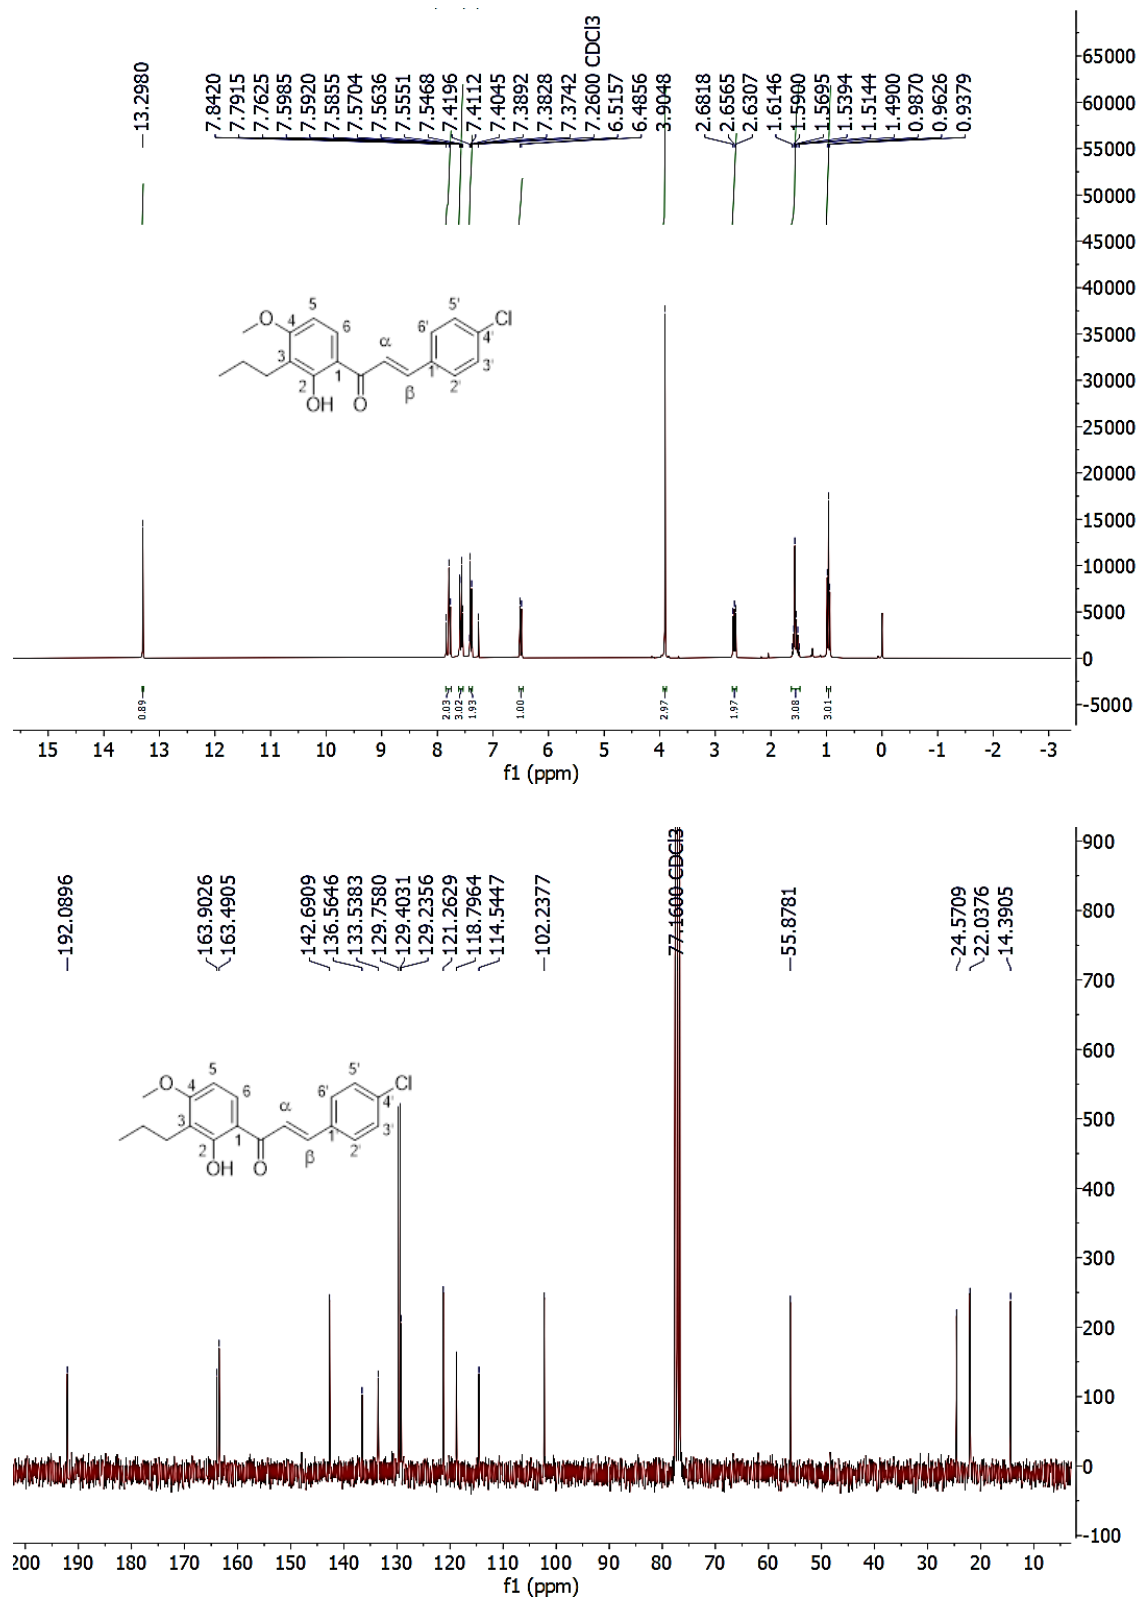

Figure S29. <sup>1</sup>H and <sup>13</sup>C NMR of compound 32.

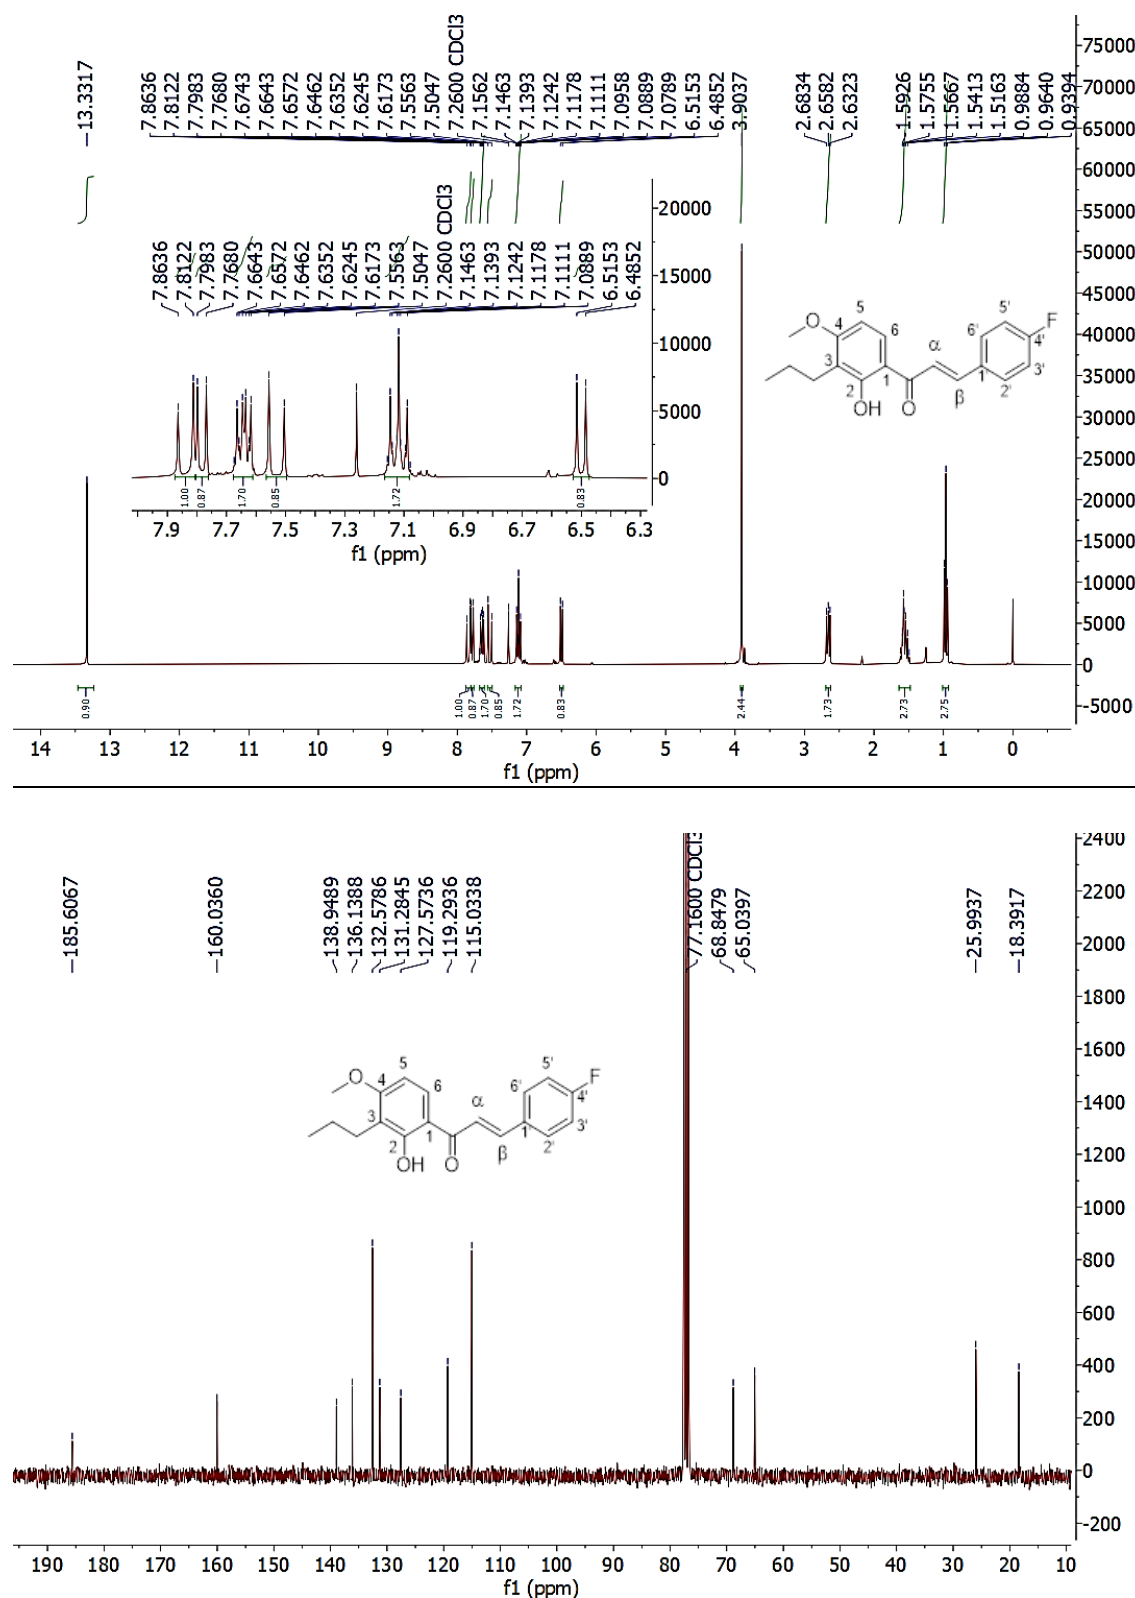Figure S30. <sup>1</sup>H and <sup>13</sup>C NMR of compound 33.

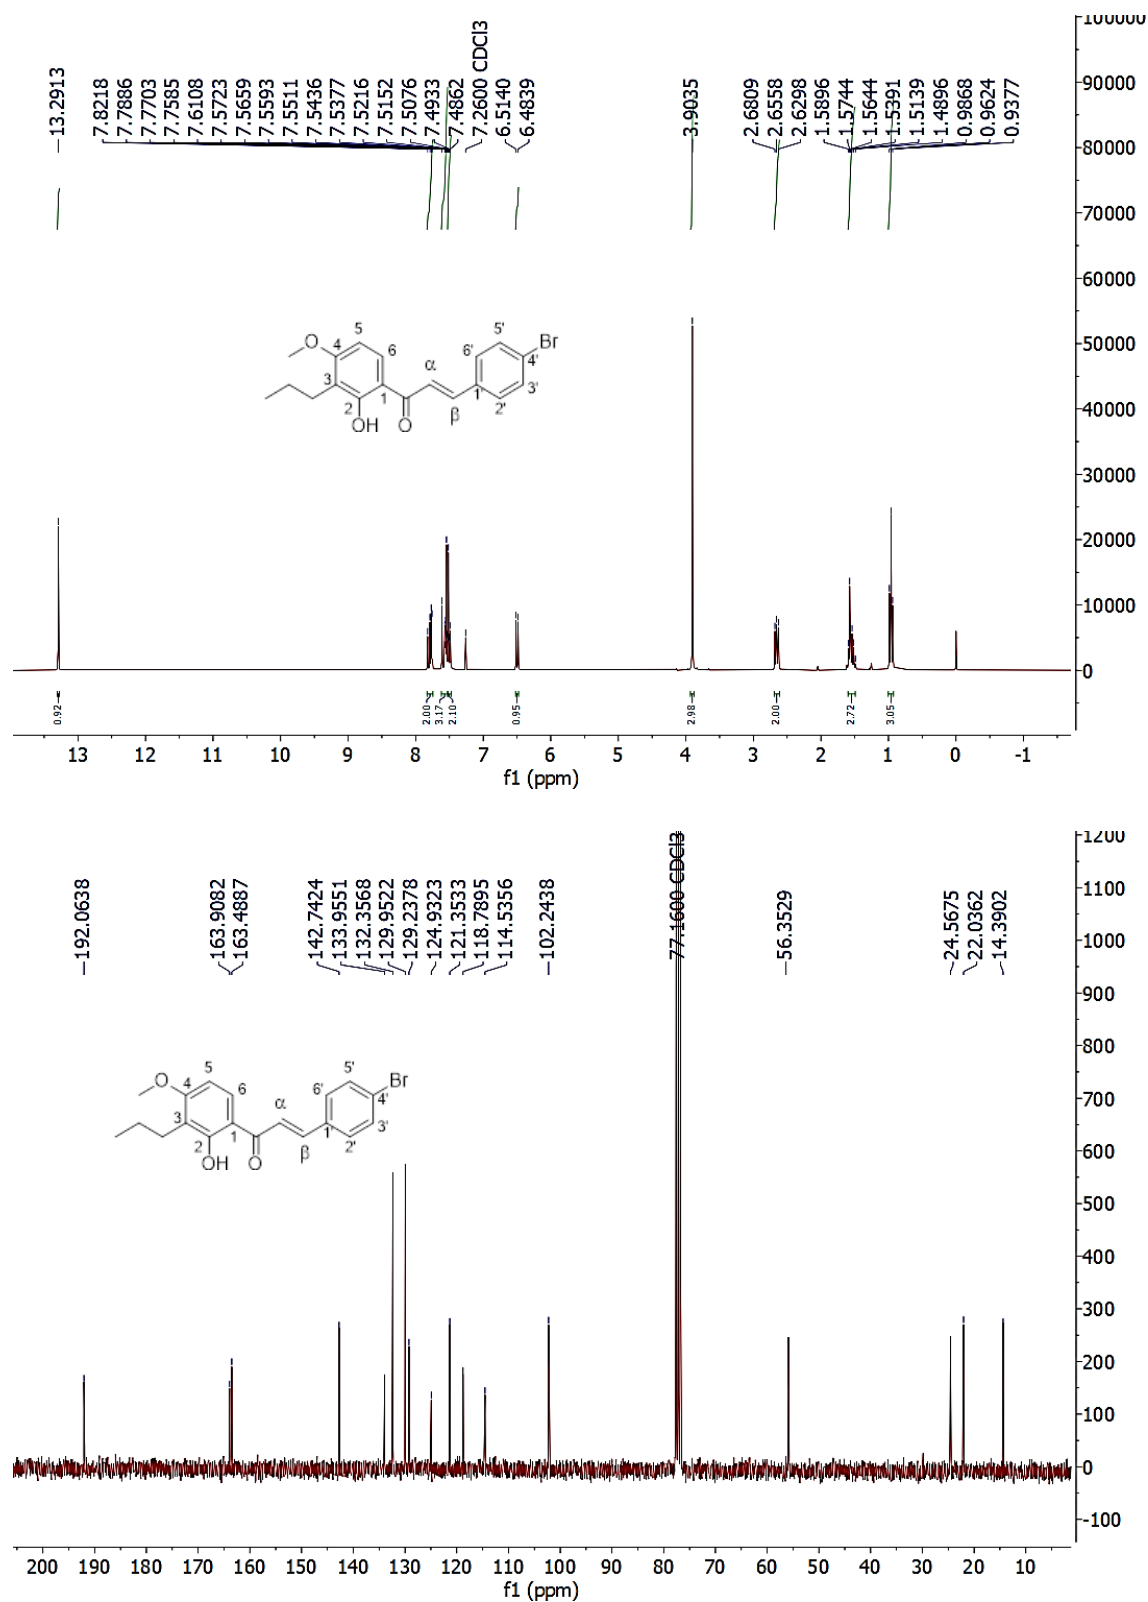

Figure S31. <sup>1</sup>H and <sup>13</sup>C NMR of compound 34.

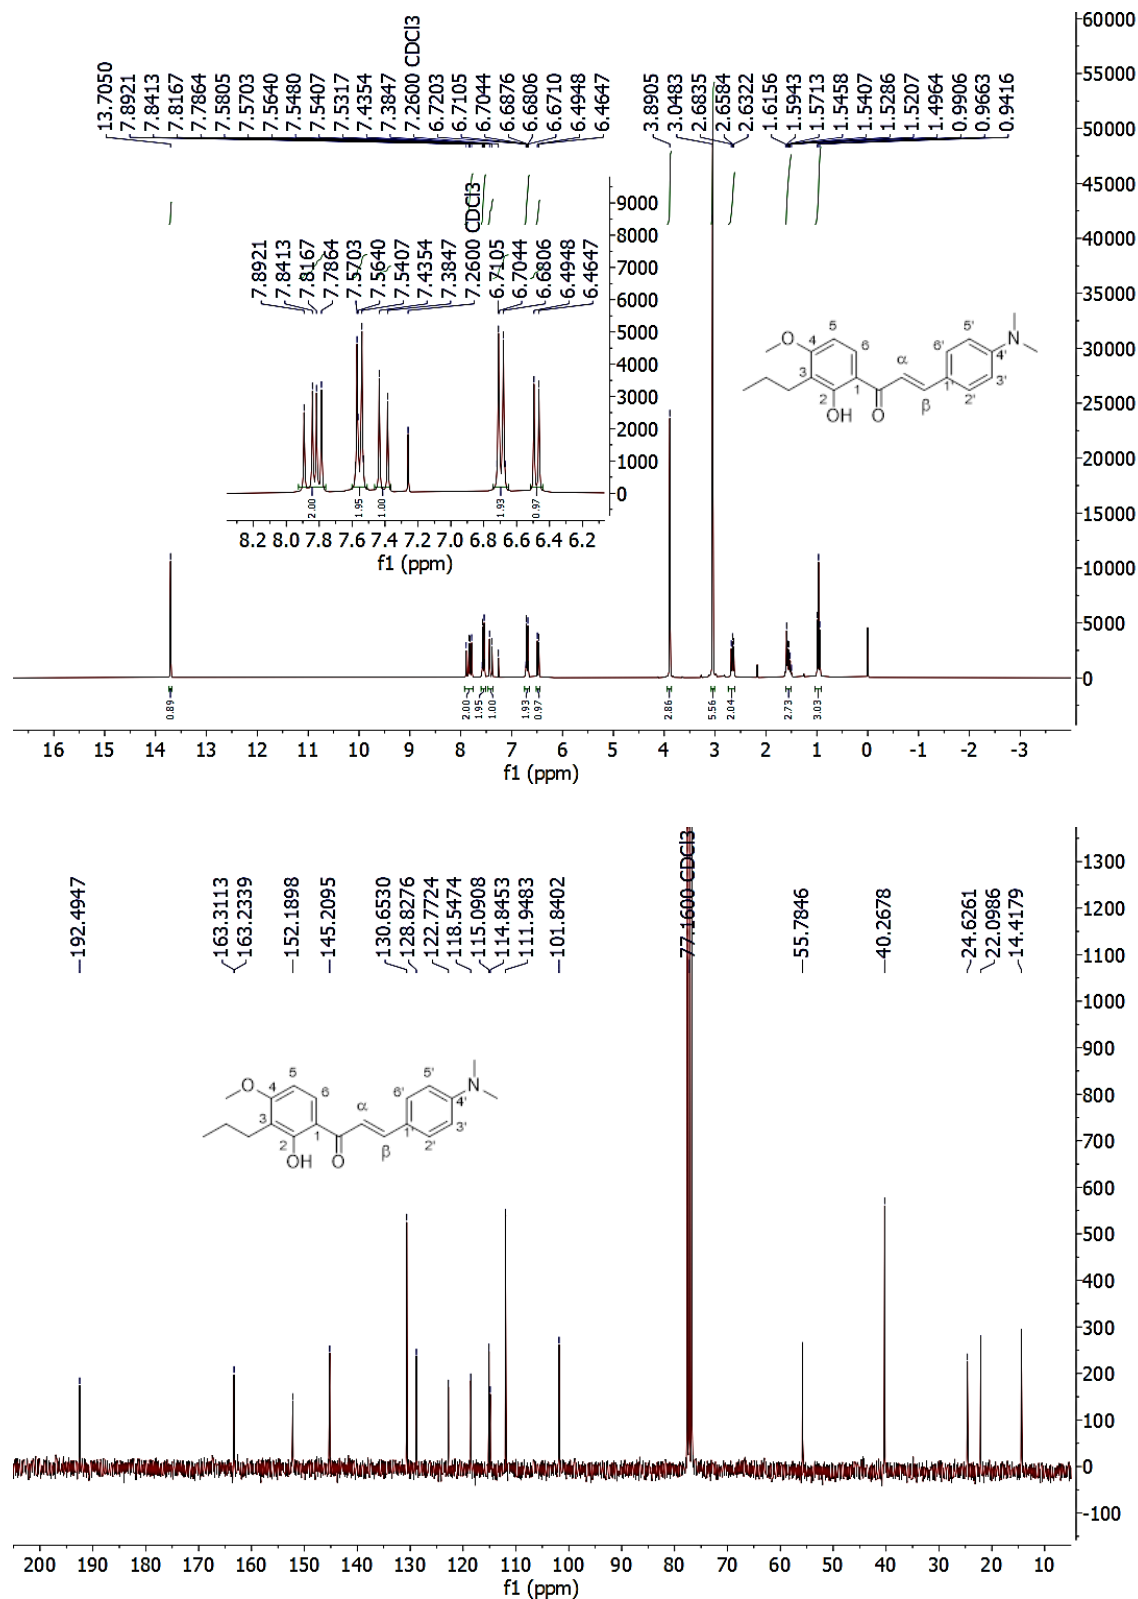Figure S32. <sup>1</sup>H and <sup>13</sup>C NMR of compound 35.

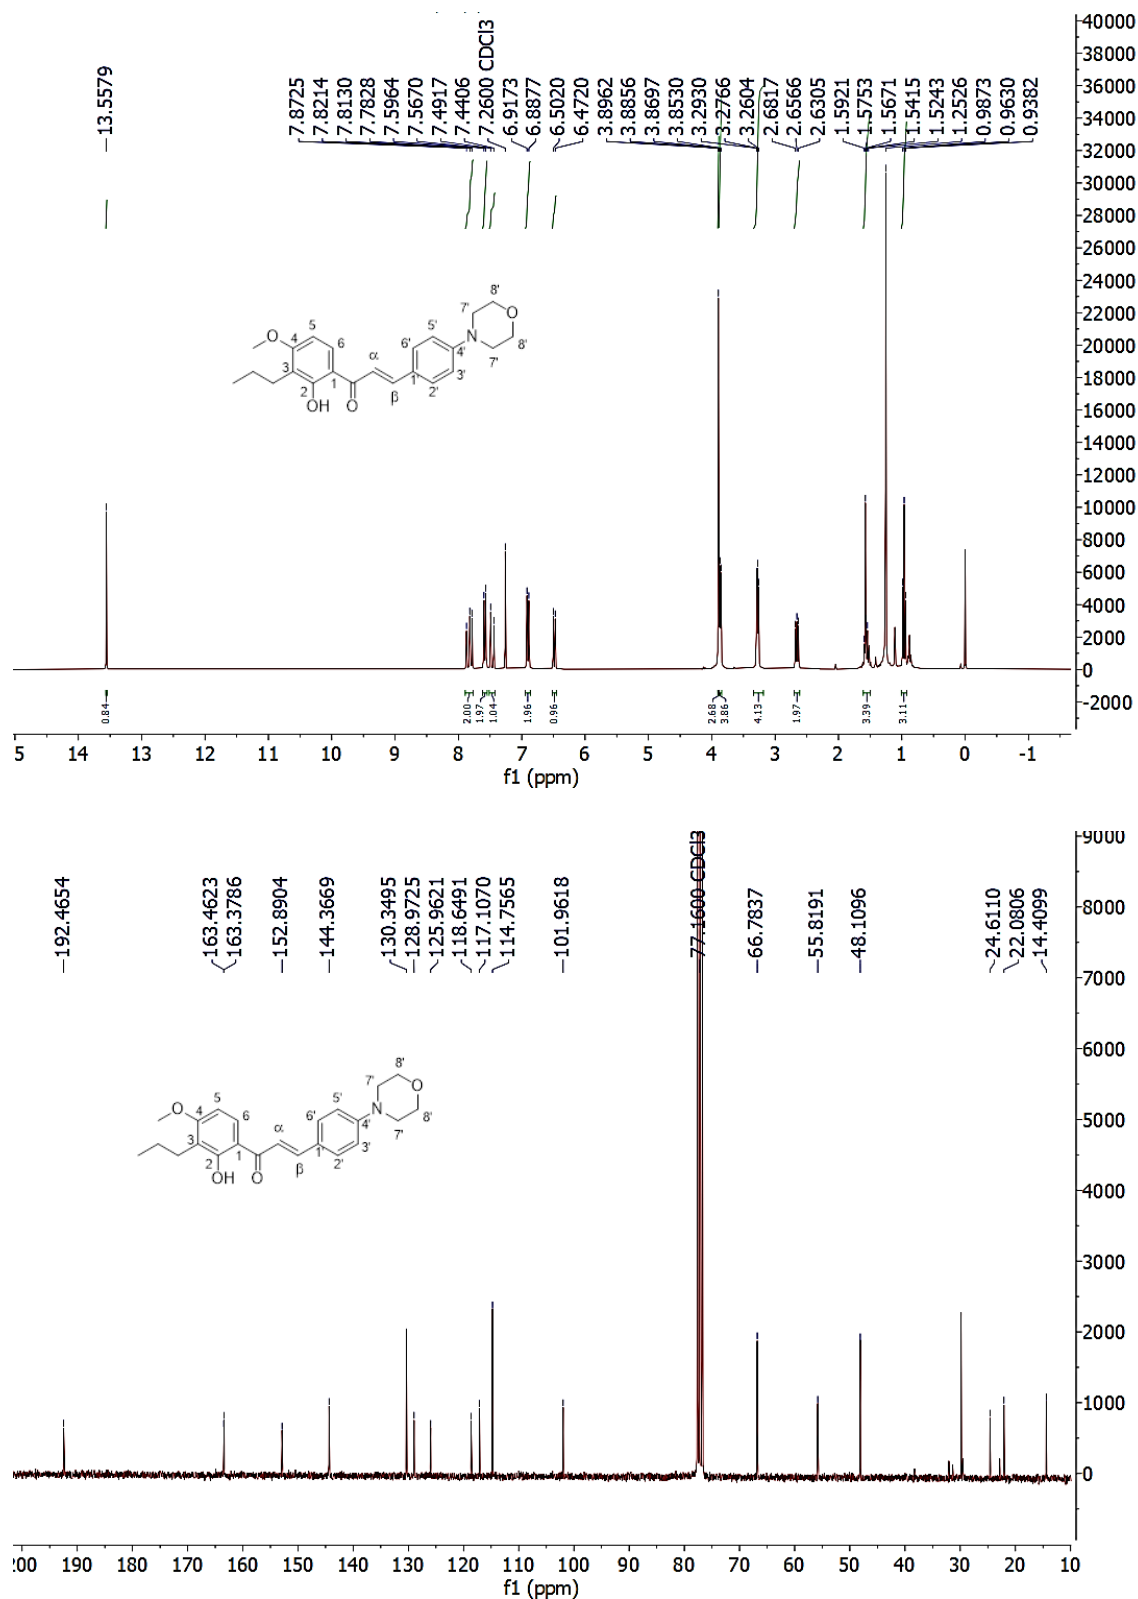Figure S33. <sup>1</sup>H and <sup>13</sup>C NMR of compound 36.

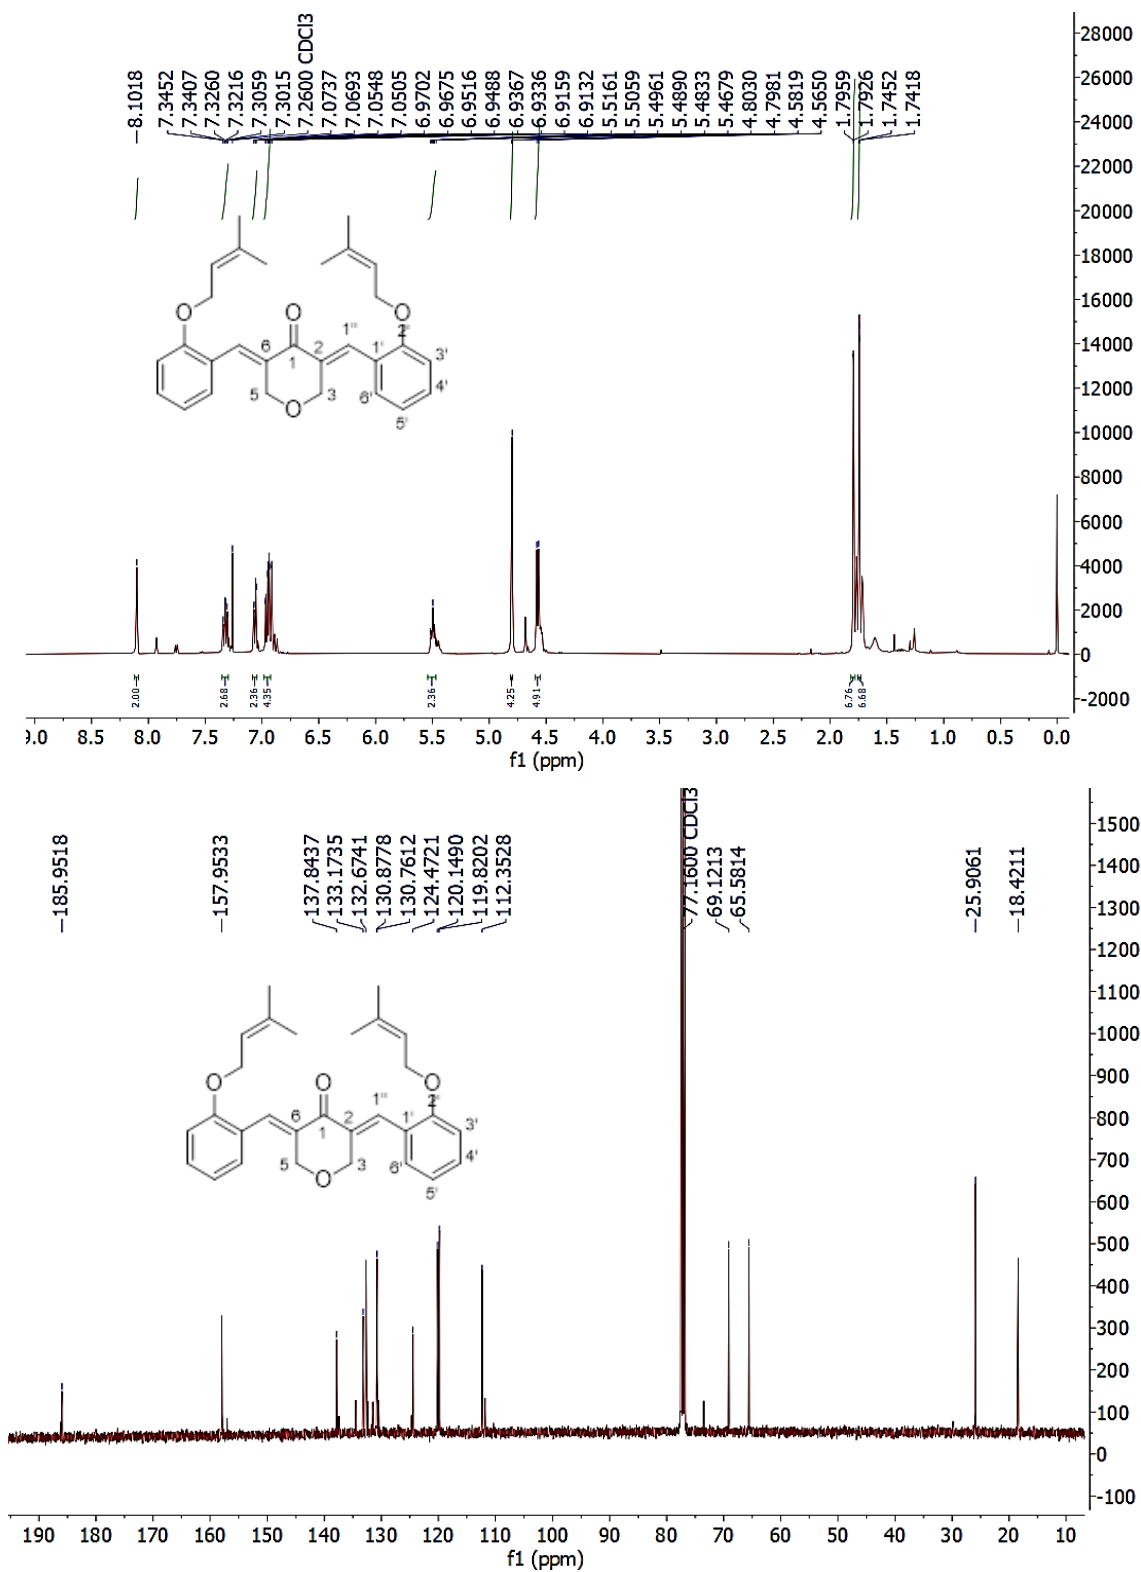Figure S34. <sup>1</sup>H and <sup>13</sup>C NMR of compound 38.

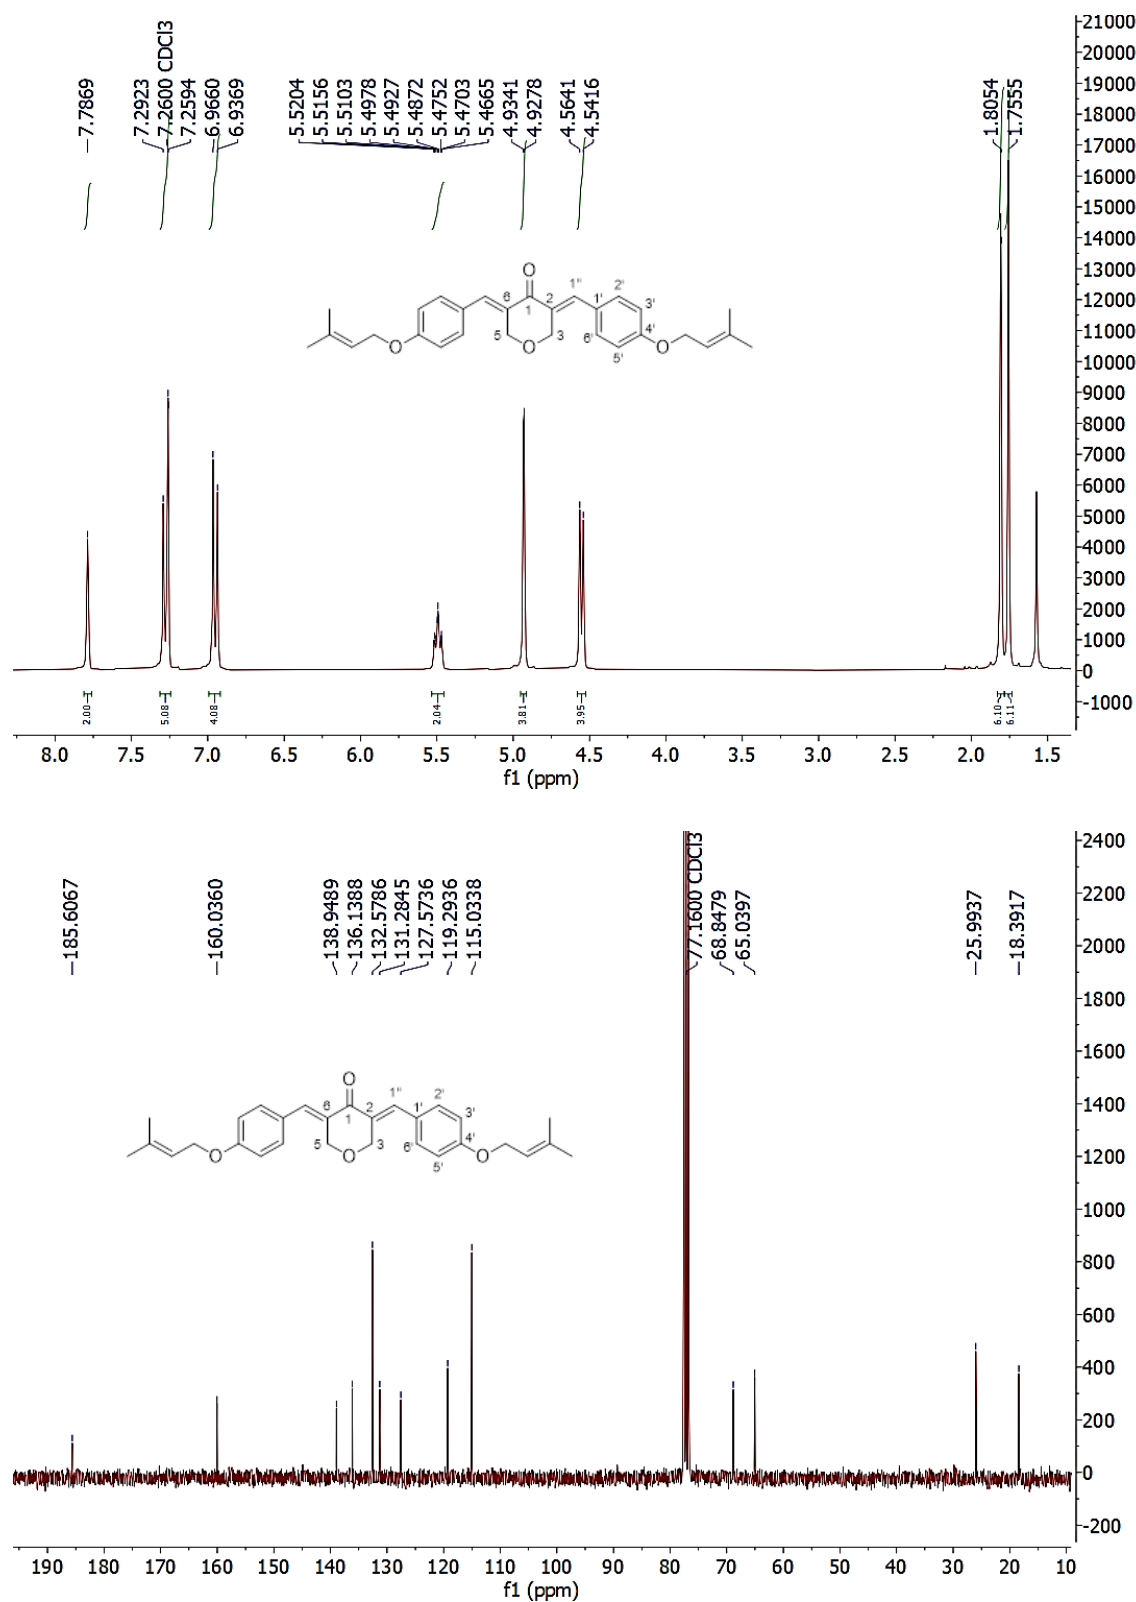Figure S35. <sup>1</sup>H and <sup>13</sup>C NMR of compound 40.





## HRMS spectra

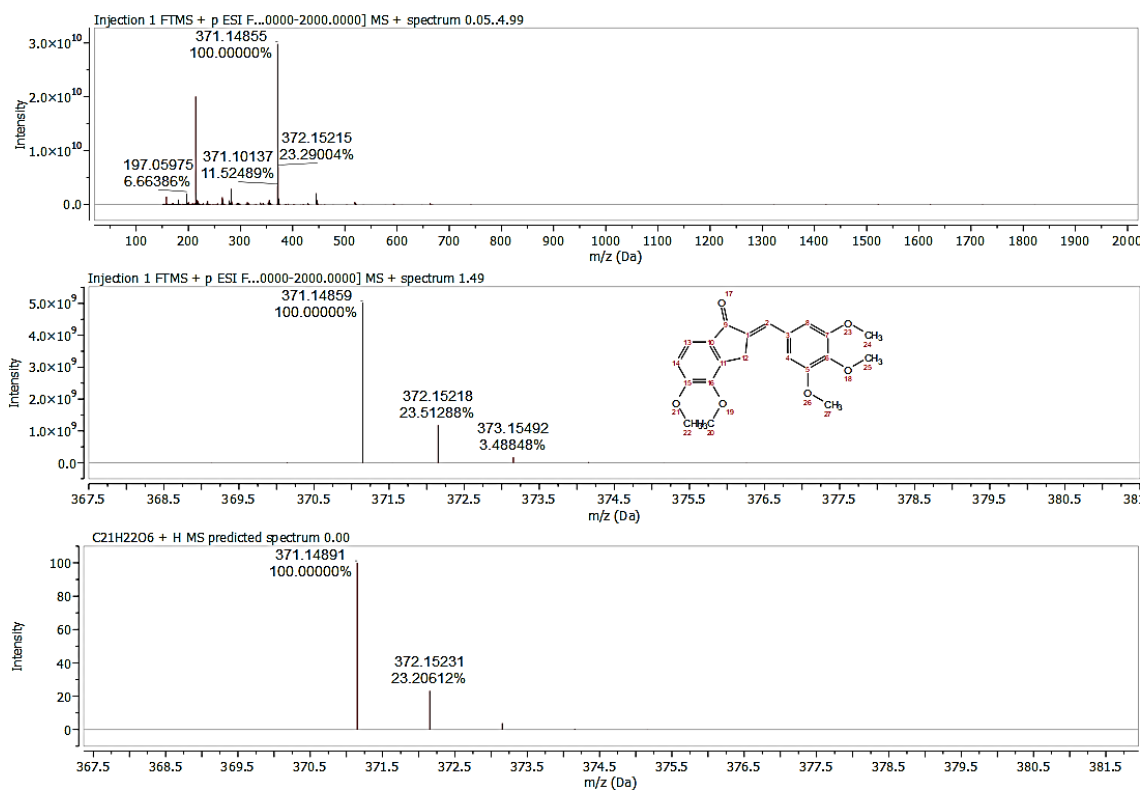

| Meas. m/z | Ion formula                                    | m/z       | Err [ppm] | Err [mDa] |
|-----------|------------------------------------------------|-----------|-----------|-----------|
| 371.14859 | C <sub>21</sub> H <sub>22</sub> O <sub>6</sub> | 371.14892 | 0.88      | 0.33      |

Figure S36. HRMS of compound 4.

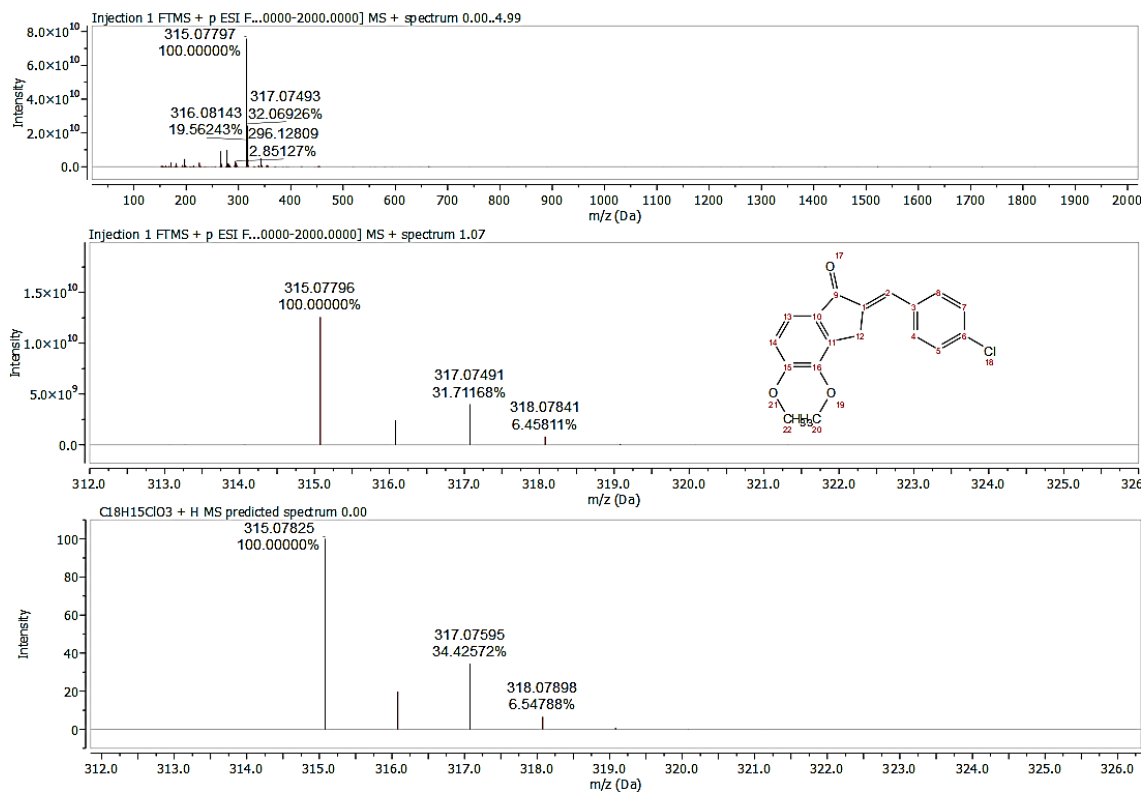

| Meas. m/z | Ion formula                                      | m/z       | Err [ppm] | Err [mDa] |
|-----------|--------------------------------------------------|-----------|-----------|-----------|
| 315.07798 | C <sub>18</sub> H <sub>15</sub> ClO <sub>3</sub> | 315.07825 | 0.92      | 0.29      |

**Figure S37.** HRMS of compound 7.

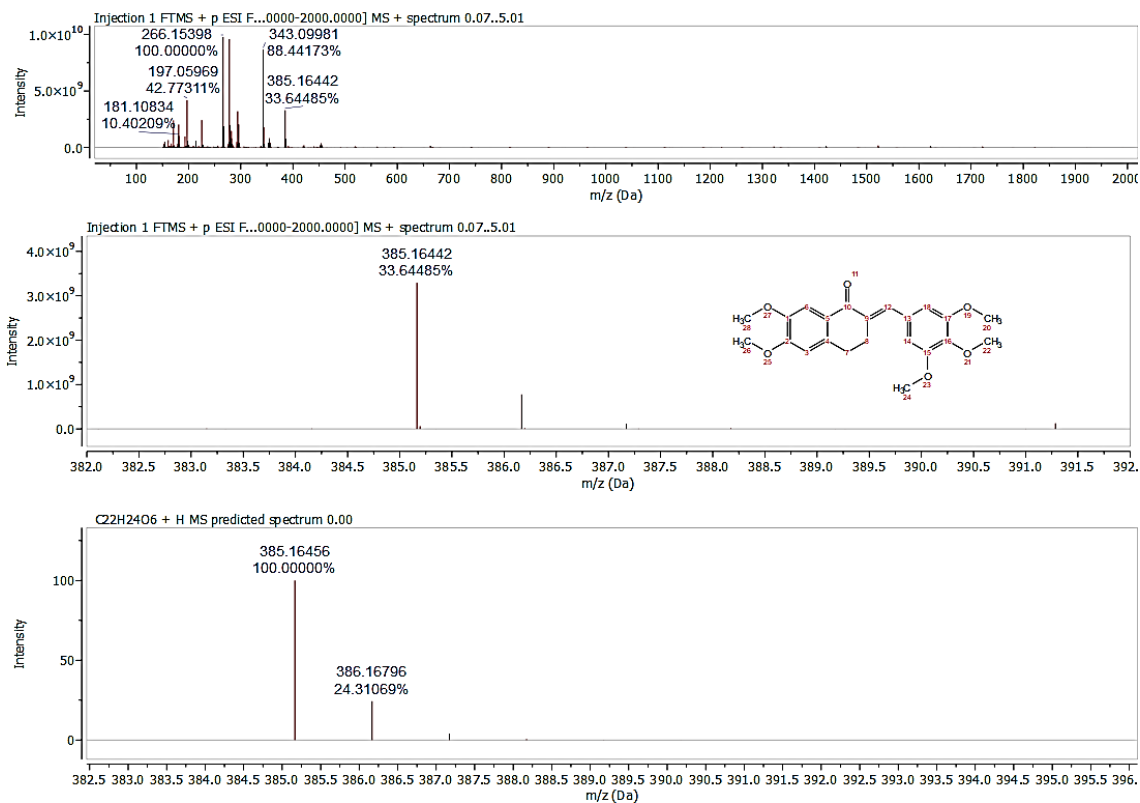

| Meas. m/z | Ion formula                                    | m/z       | Err [ppm] | Err [mDa] |
|-----------|------------------------------------------------|-----------|-----------|-----------|
| 385.16442 | C <sub>22</sub> H <sub>25</sub> O <sub>6</sub> | 385.16156 | 0.38      | 0.15      |

**Figure S38.** HRMS of compound **10**.

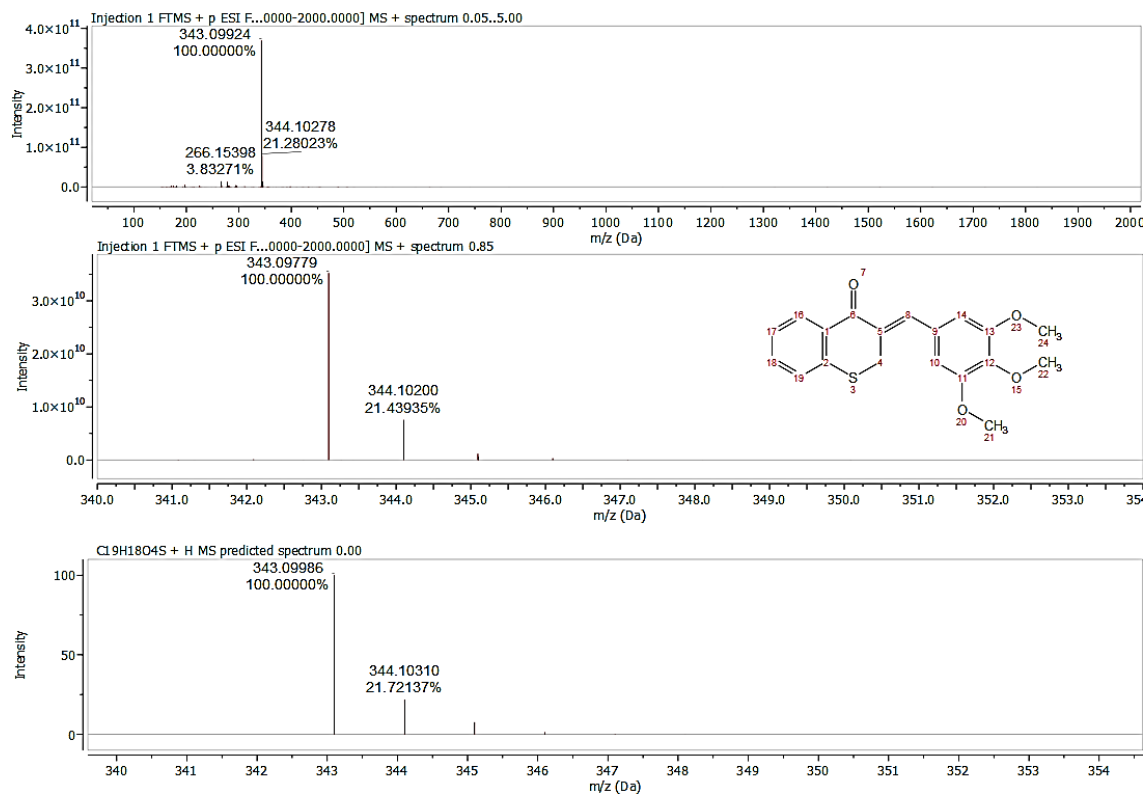

| Meas. m/z | Ion formula                                      | m/z       | Err [ppm] | Err [mDa] |
|-----------|--------------------------------------------------|-----------|-----------|-----------|
| 343.09779 | C <sub>19</sub> H <sub>18</sub> O <sub>4</sub> S | 343.09986 | 1.80      | 0.62      |

Figure S39. HRMS of compound 12.

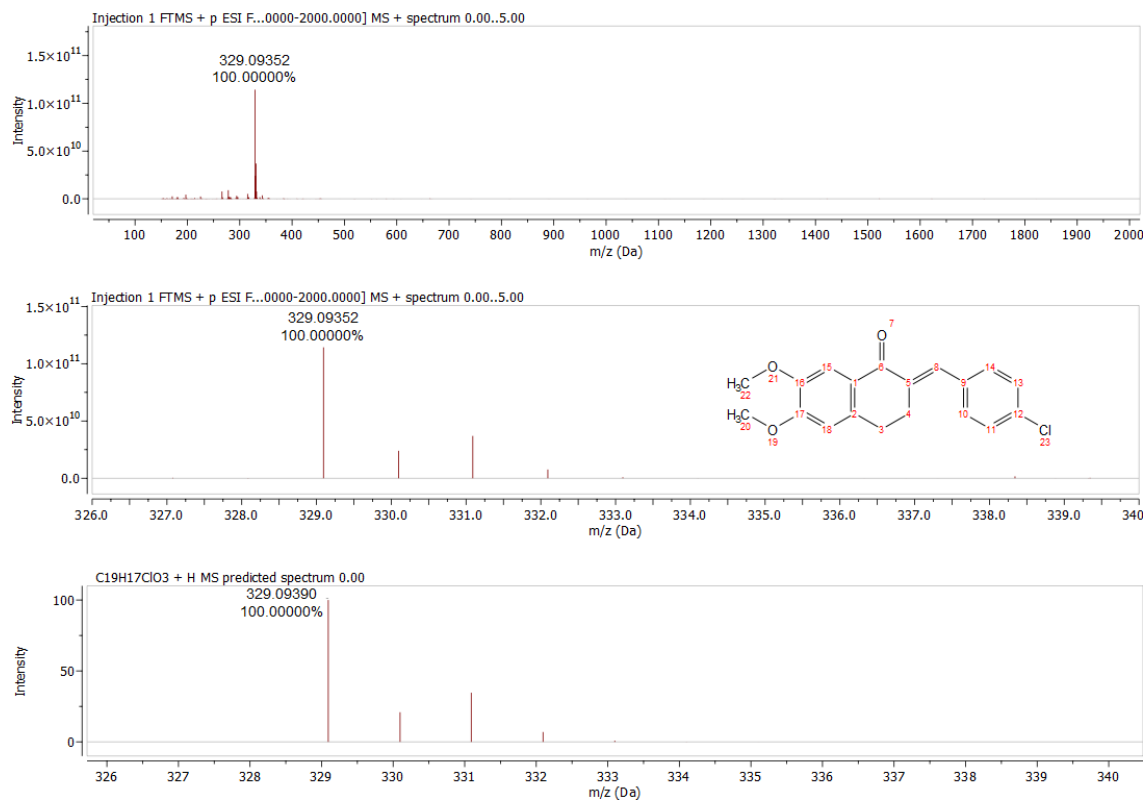

| Meas. m/z | Ion formula                                      | m/z       | Err [ppm] | Err [mDa] |
|-----------|--------------------------------------------------|-----------|-----------|-----------|
| 329.09352 | C <sub>19</sub> H <sub>17</sub> ClO <sub>3</sub> | 329.09390 | 1.15      | 0.38      |

Figure S40. HRMS of compound 14.

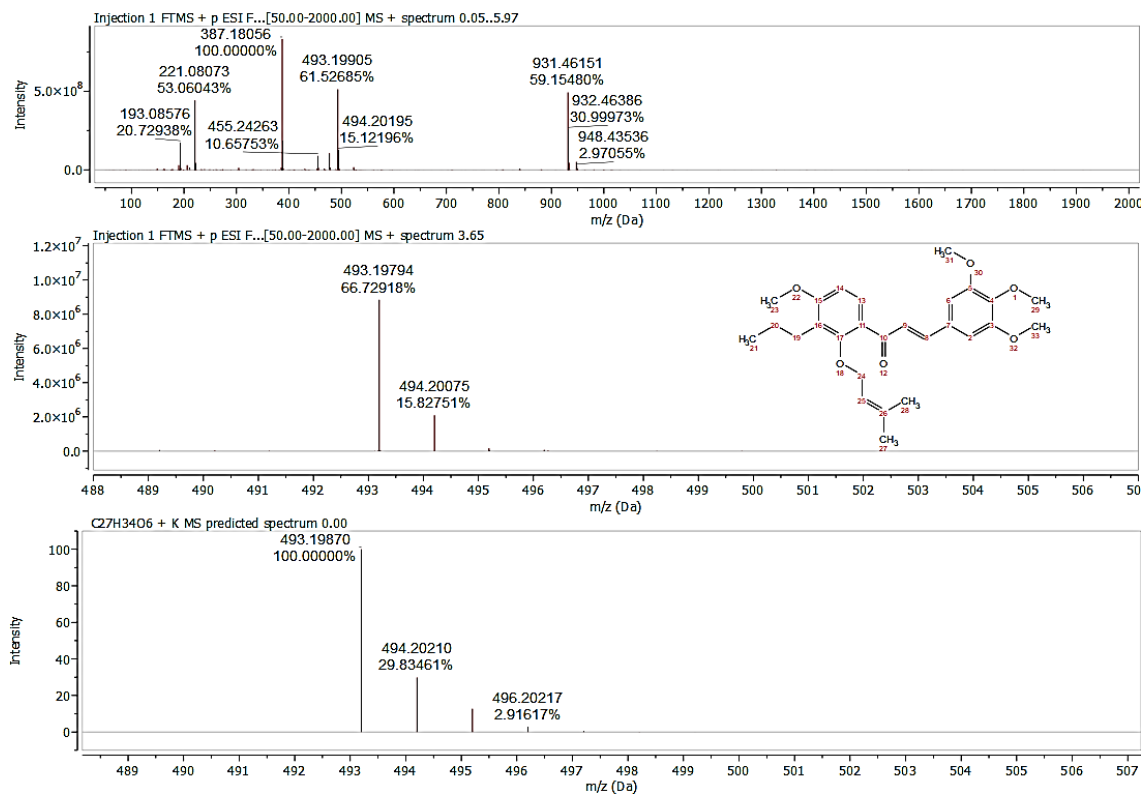

| Meas. m/z | Ion formula                                    | m/z       | Err [ppm] | Err [mDa] |
|-----------|------------------------------------------------|-----------|-----------|-----------|
| 493.19794 | C <sub>27</sub> H <sub>34</sub> O <sub>6</sub> | 493.19870 | 1.54      | 0.76      |

**Figure S41. HRMS of compound 26.**

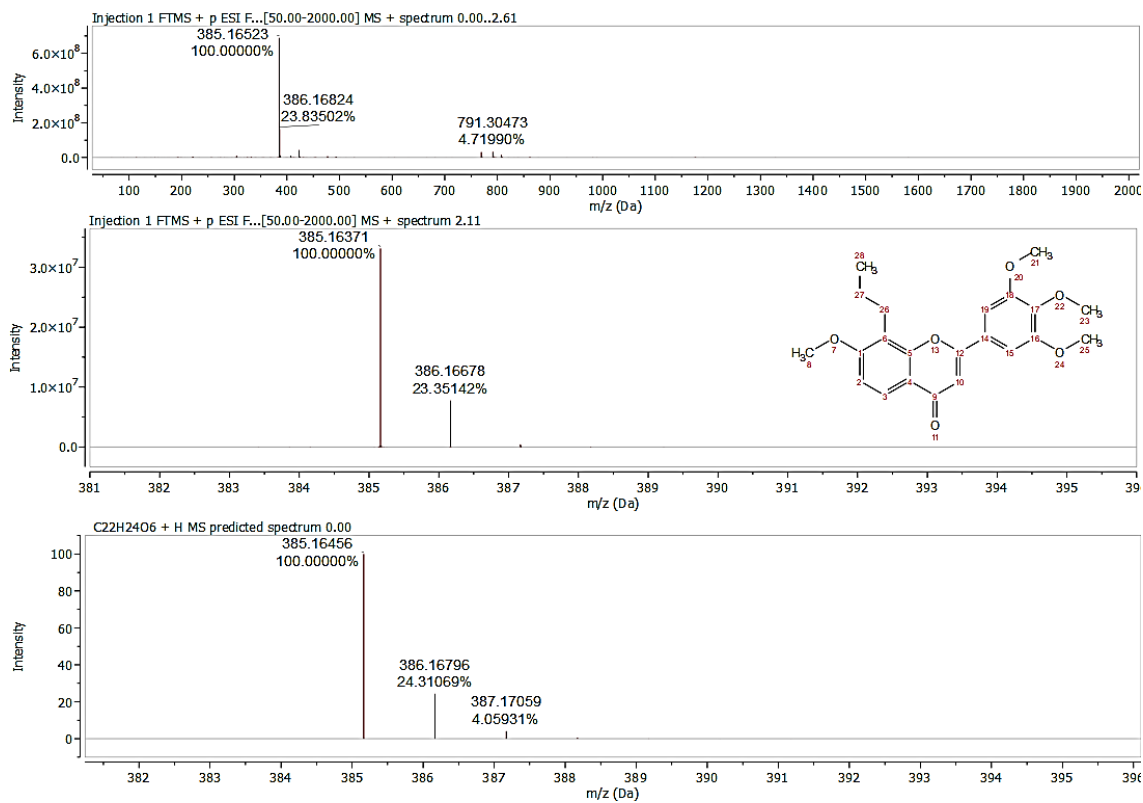

| Meas. m/z | Ion formula                                    | m/z       | Err [ppm] | Err [mDa] |
|-----------|------------------------------------------------|-----------|-----------|-----------|
| 385.16371 | C <sub>22</sub> H <sub>24</sub> O <sub>6</sub> | 385.16456 | 2.22      | 0.86      |

Figure S42. HRMS of compound 27.

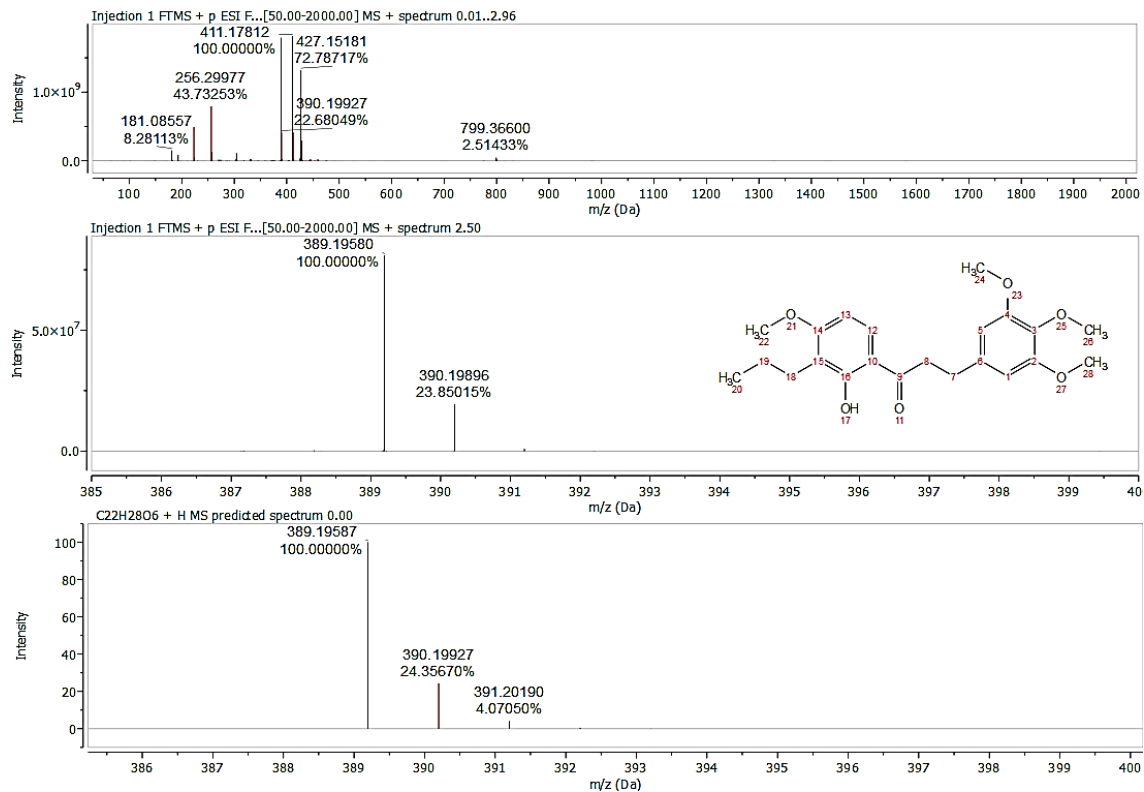



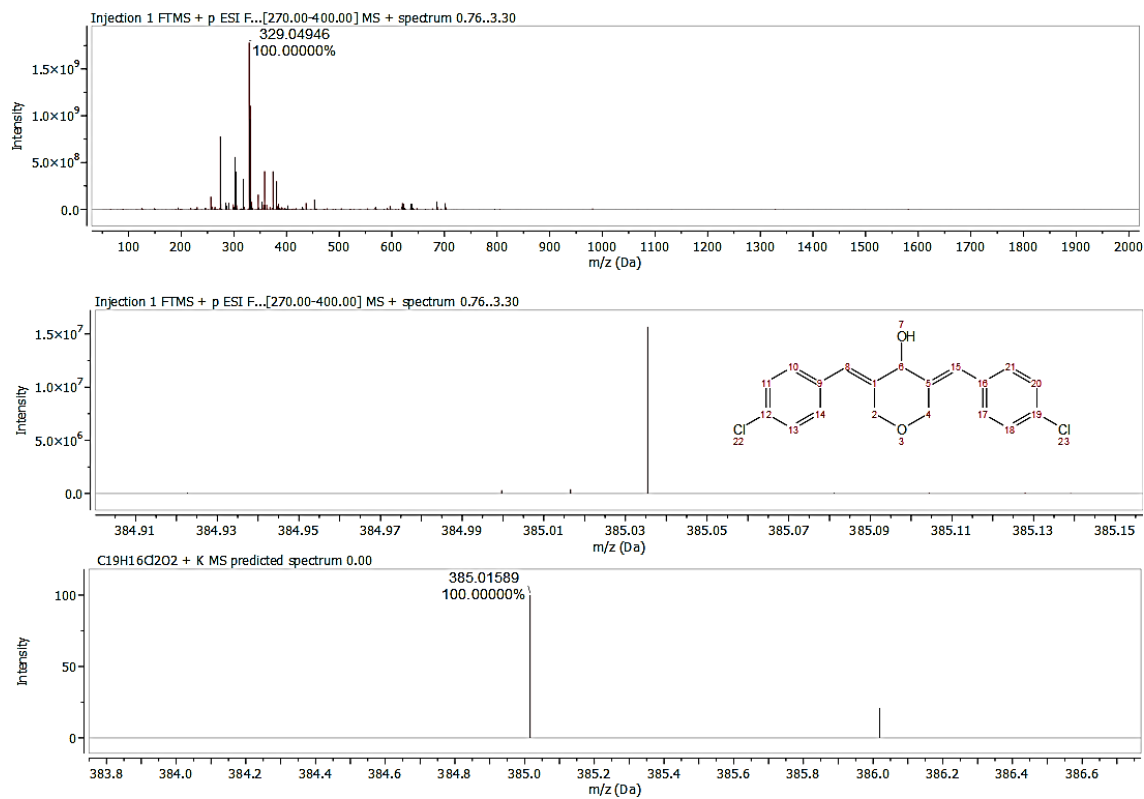

| Meas. m/z | Ion formula                                                    | m/z       | Err [ppm] | Err [mDa] |
|-----------|----------------------------------------------------------------|-----------|-----------|-----------|
| 385.01545 | C <sub>19</sub> H <sub>16</sub> Cl <sub>2</sub> O <sub>2</sub> | 385.01598 | 1.15      | 0.44      |

**Figure S44.** HRMS of compound 30.

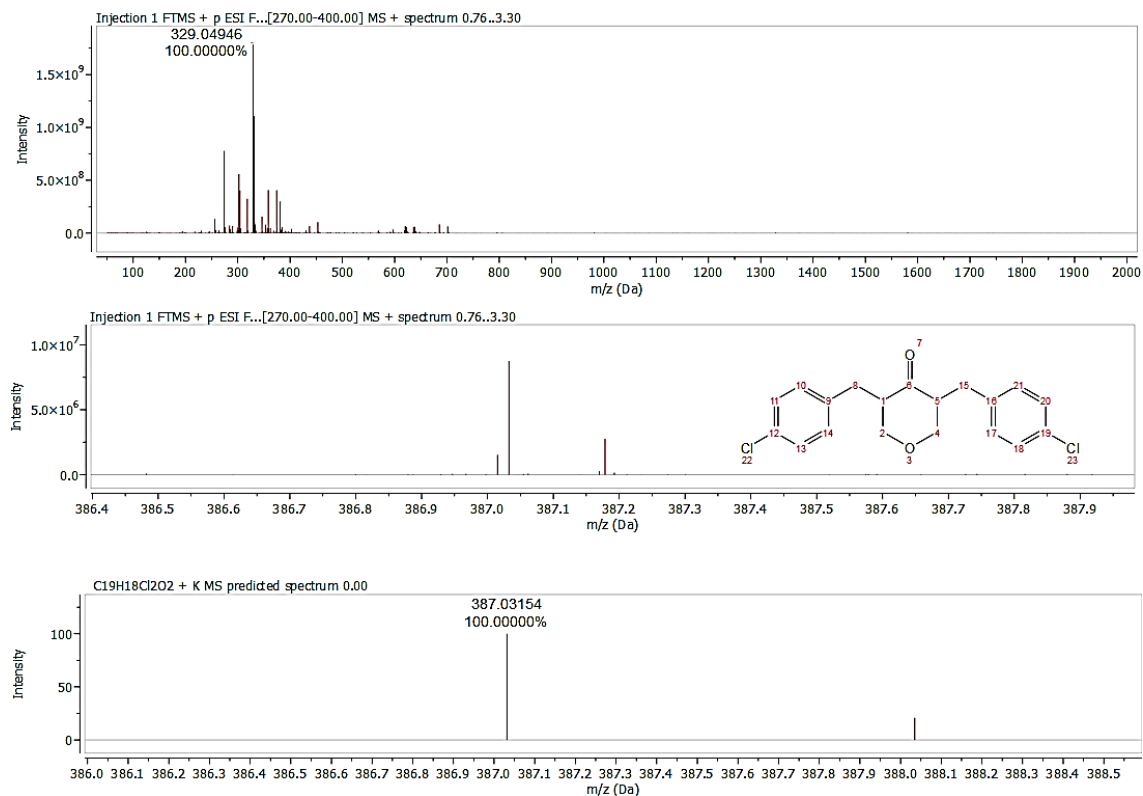

| Meas. m/z | Ion formula                                                    | m/z       | Err [ppm] | Err [mDa] |
|-----------|----------------------------------------------------------------|-----------|-----------|-----------|
| 387.03260 | C <sub>19</sub> H <sub>18</sub> Cl <sub>2</sub> O <sub>2</sub> | 387.03154 | -2.73     | -1.06     |

Figure S45. HRMS of compound 31.

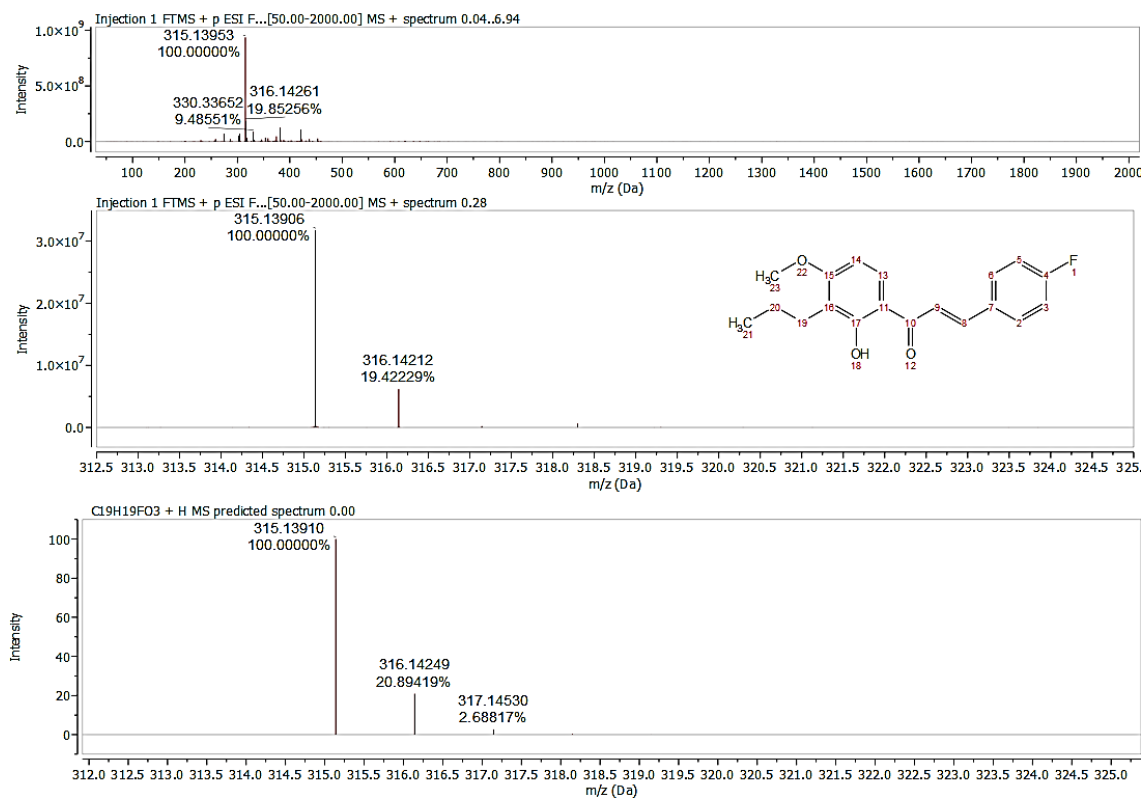

| Meas. m/z | Ion formula                                     | m/z       | Err [ppm] | Err [mDa] |
|-----------|-------------------------------------------------|-----------|-----------|-----------|
| 315.13906 | C <sub>19</sub> H <sub>19</sub> FO <sub>3</sub> | 315.13910 | 0.13      | 0.04      |

Figure S46. HRMS of compound 33.

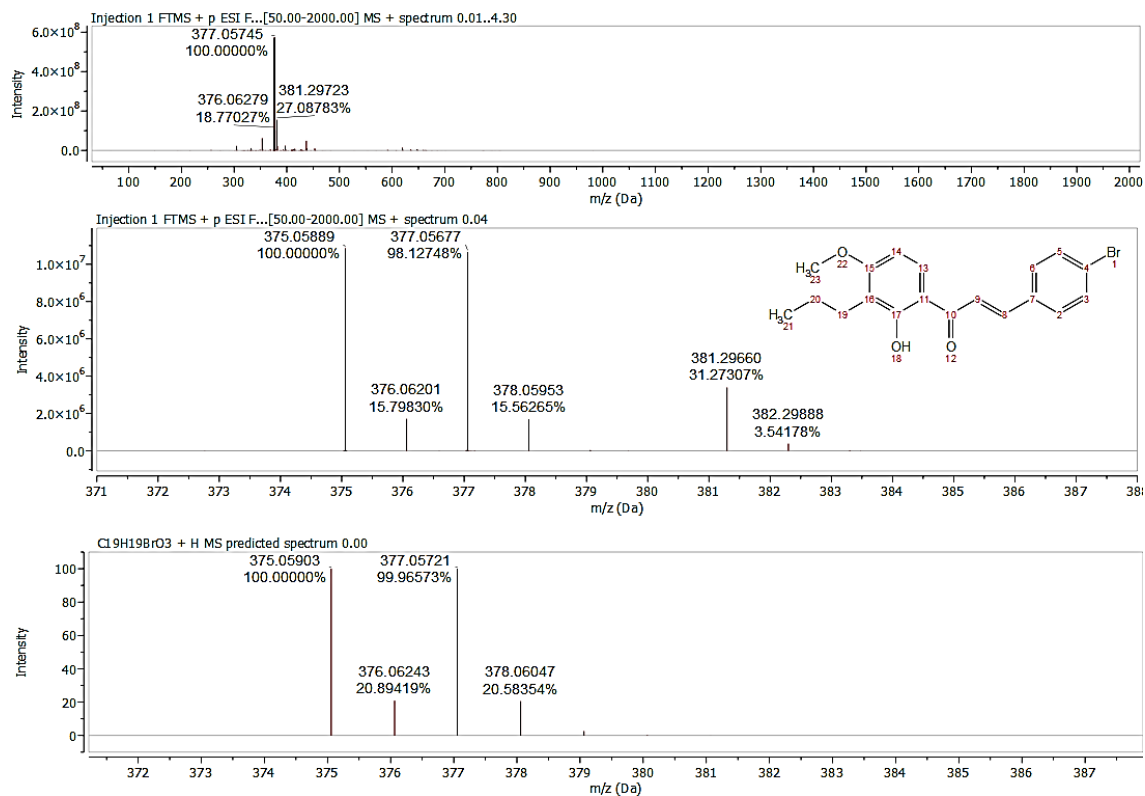

| Meas. m/z | Ion formula                                      | m/z       | Err [ppm] | Err [mDa] |
|-----------|--------------------------------------------------|-----------|-----------|-----------|
| 375.05889 | C <sub>19</sub> H <sub>19</sub> BrO <sub>3</sub> | 375.05903 | 0.38      | 0.14      |

Figure S47. HRMS of compound 34.

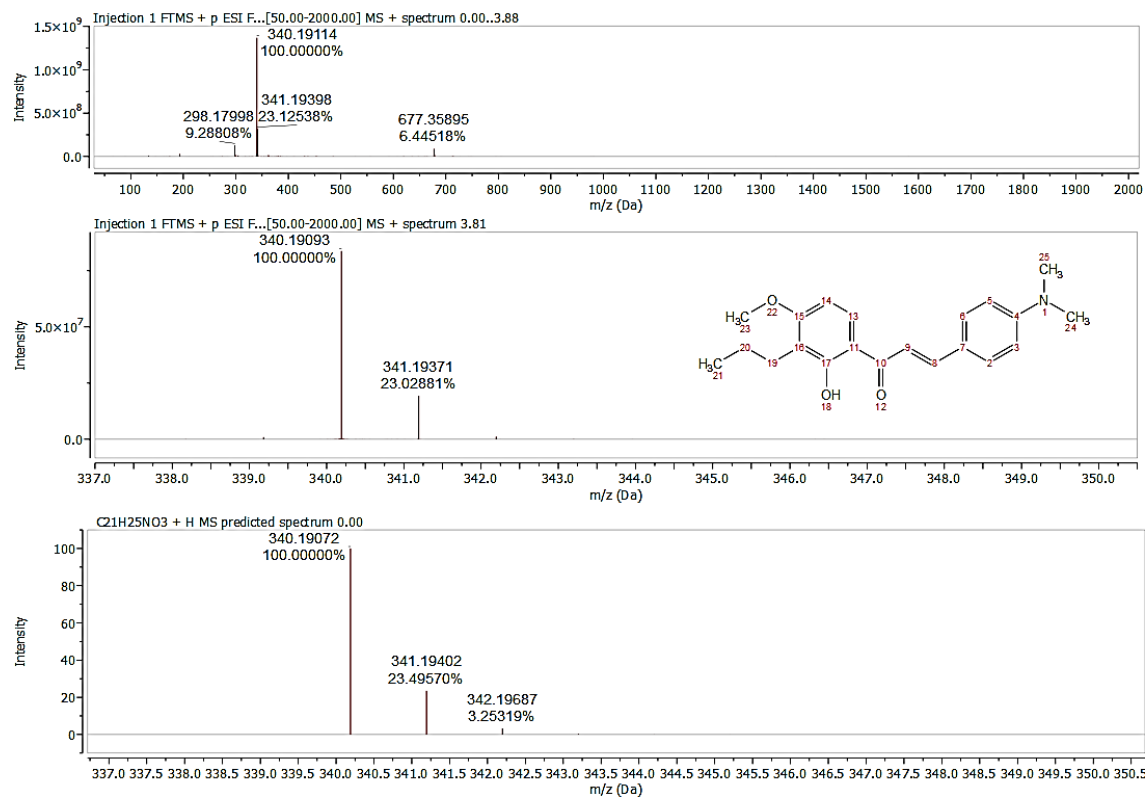

| Meas. m/z | Ion formula                                     | m/z       | Err [ppm] | Err [mDa] |
|-----------|-------------------------------------------------|-----------|-----------|-----------|
| 340.19093 | C <sub>21</sub> H <sub>25</sub> NO <sub>3</sub> | 340.19072 | -0.62     | -0.21     |

Figure S48. HRMS of compound 35.

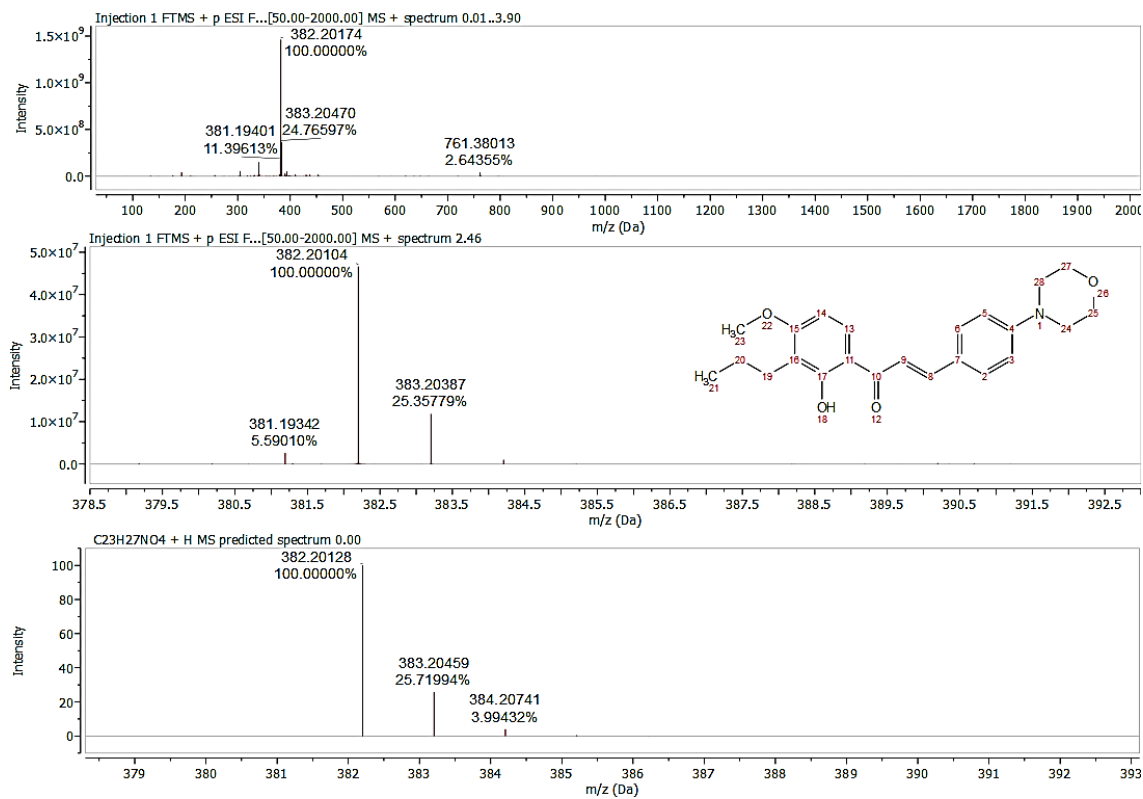

| Meas. m/z | Ion formula                                     | m/z       | Err [ppm] | Err [mDa] |
|-----------|-------------------------------------------------|-----------|-----------|-----------|
| 382.20104 | C <sub>23</sub> H <sub>27</sub> NO <sub>4</sub> | 382.20128 | 0.64      | 0.25      |

Figure S49. HRMS of compound 36.

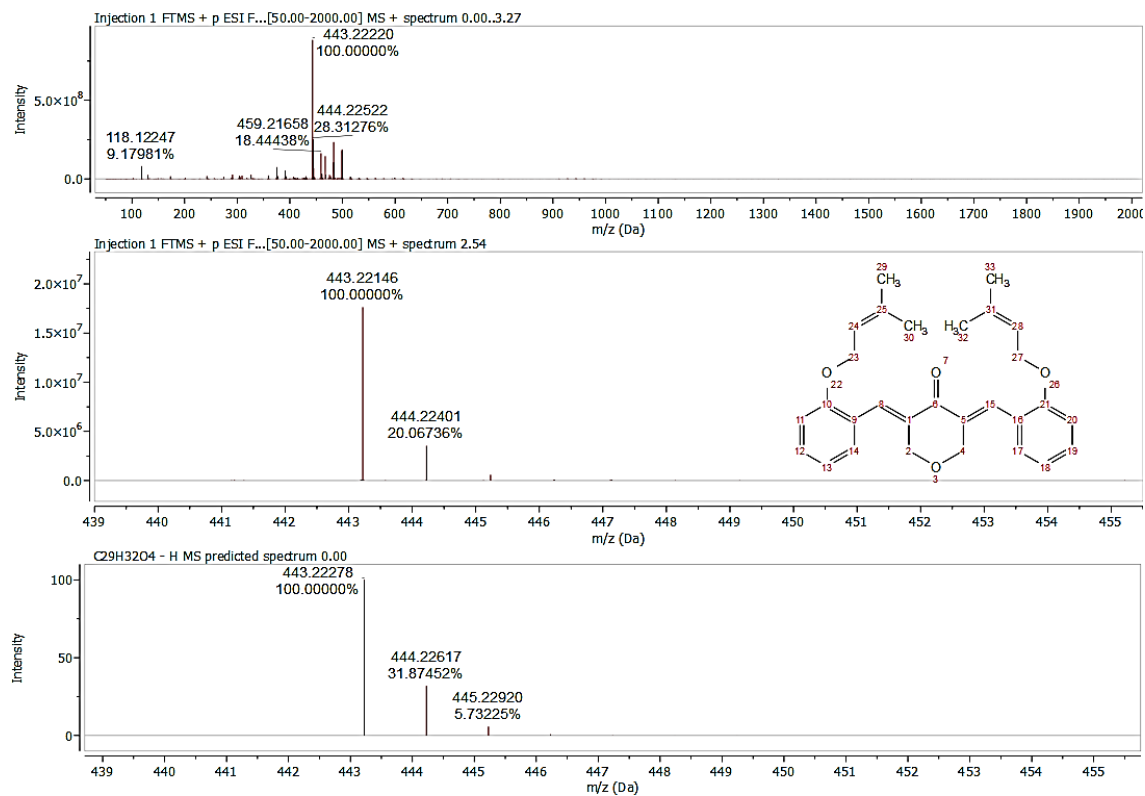

| Meas. m/z | Ion formula                                    | m/z       | Err [ppm] | Err [mDa] |
|-----------|------------------------------------------------|-----------|-----------|-----------|
| 443.22146 | C <sub>29</sub> H <sub>32</sub> O <sub>4</sub> | 443.22278 | 2.99      | 1.32      |

Figure S50. HRMS of compound 38.

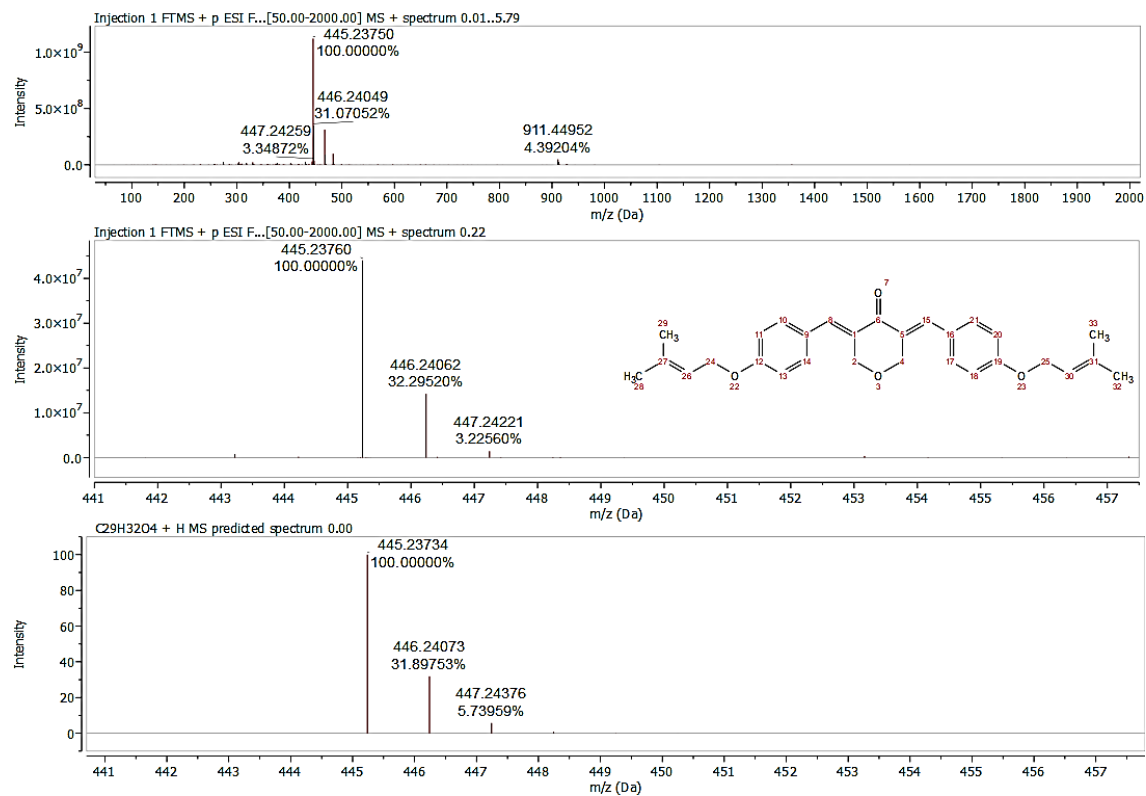

| Meas. m/z | Ion formula                                    | m/z       | Err [ppm] | Err [mDa] |
|-----------|------------------------------------------------|-----------|-----------|-----------|
| 445.23760 | C <sub>29</sub> H <sub>32</sub> O <sub>4</sub> | 445.23734 | -0.59     | -0.26     |

Figure S51. HRMS of compound 40.





## HPLC chromatograms

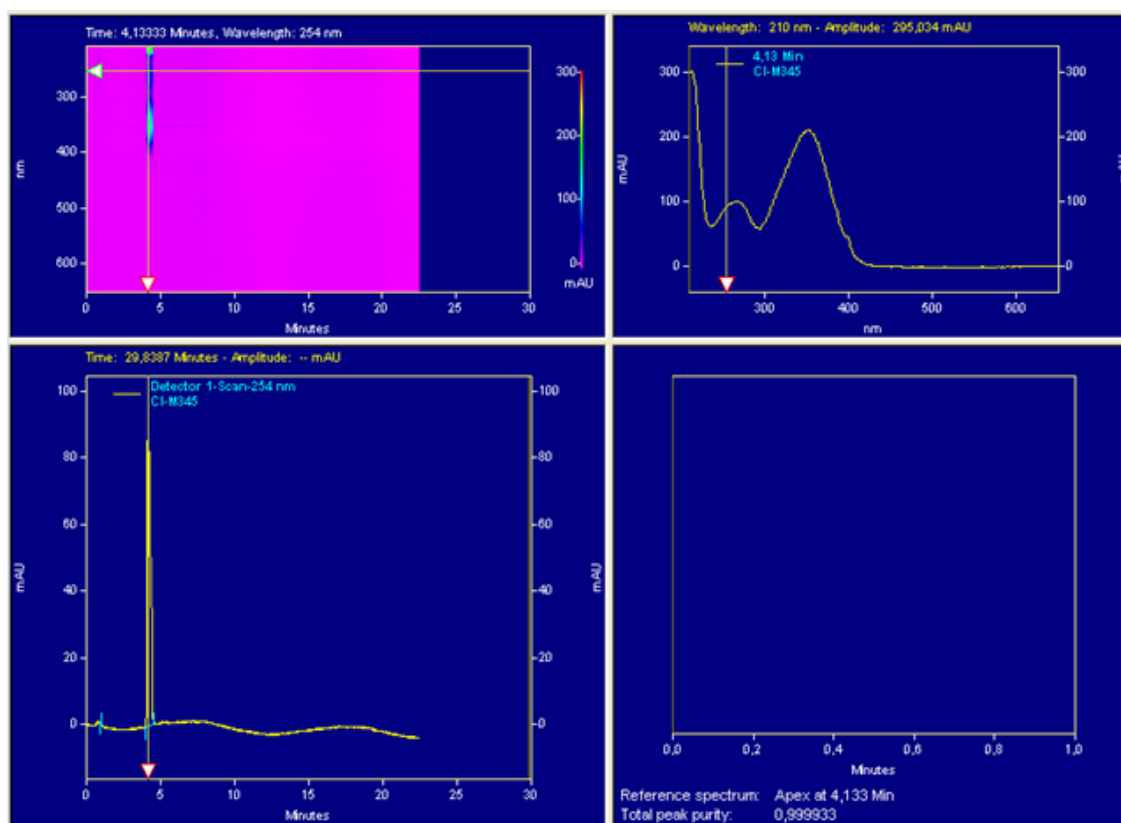

| Retention Time | Area    | Area % | Height | Height % |
|----------------|---------|--------|--------|----------|
| 0.900          | 1424    | 0.10   | 372    | 0.40     |
| 4.133          | 1391952 | 99.90  | 92997  | 99.60    |
| Totals         | 1393376 | 100.00 | 93369  | 100.00   |

Figure S52. HPLC chromatograms of compound 3.

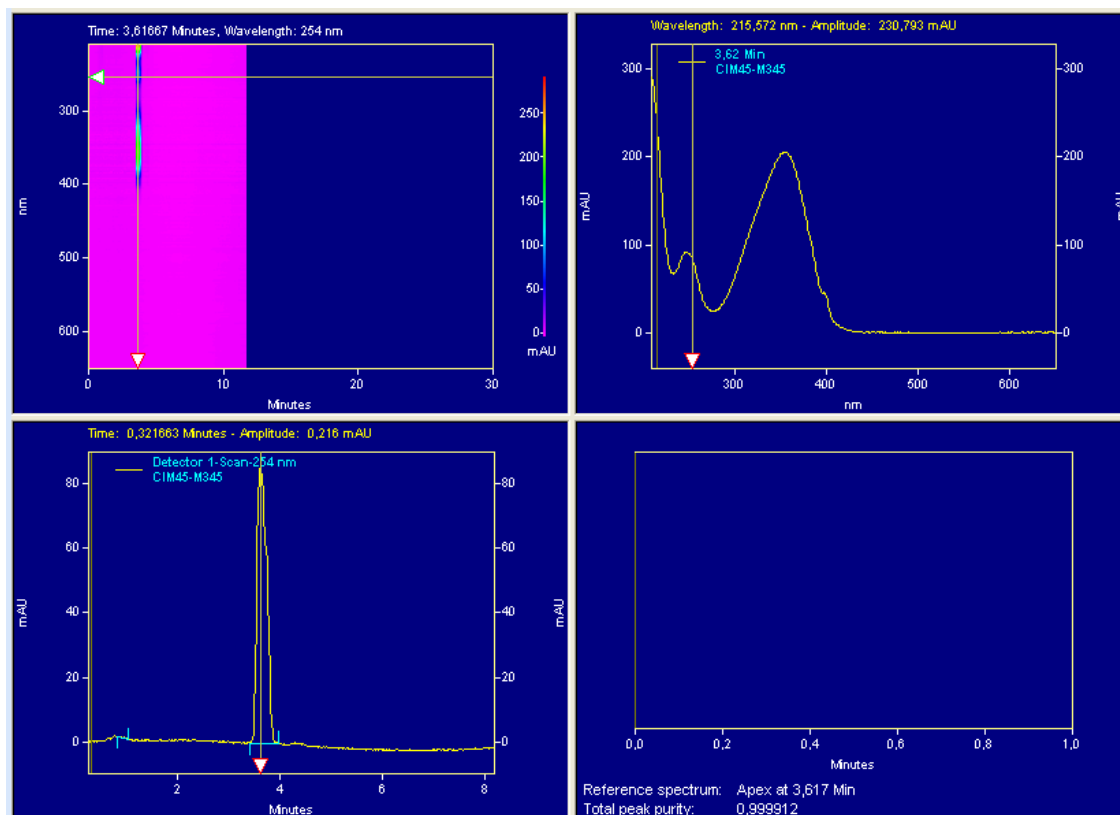

| Retention Time | Area    | Area % | Height | Height % |
|----------------|---------|--------|--------|----------|
| 0.850          | 2616    | 0.23   | 195    | 0.23     |
| 3.617          | 1142225 | 99.77  | 85221  | 99.77    |
| Totals         | 1144841 | 100.00 | 85416  | 100.00   |

Figure S53. HPLC chromatograms of compound 4.

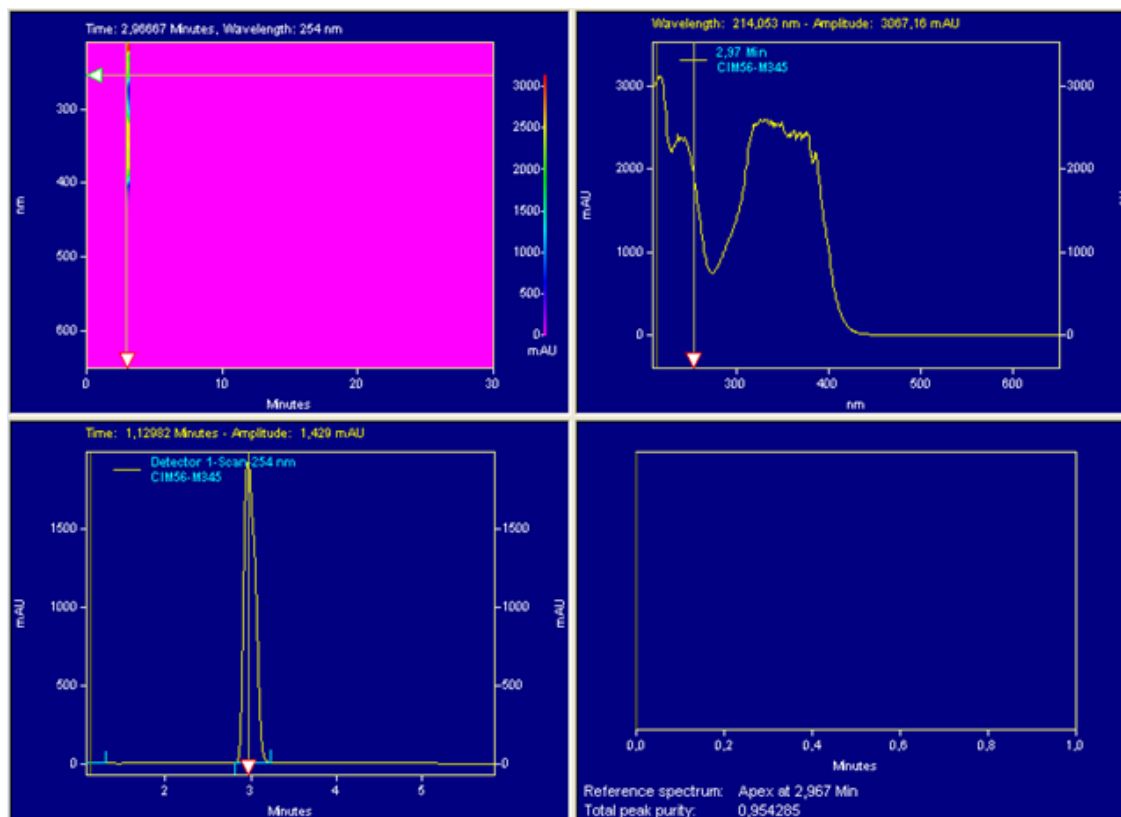

| Retention Time | Area     | Area % | Height  | Height % |
|----------------|----------|--------|---------|----------|
| 1.000          | 49480    | 0.29   | 1710    | 0.09     |
| 2.967          | 16814680 | 99.71  | 1948883 | 99.91    |
| Totals         | 16864160 | 100.00 | 1950593 | 100.00   |

Figure S54. HPLC chromatograms of compound 5.

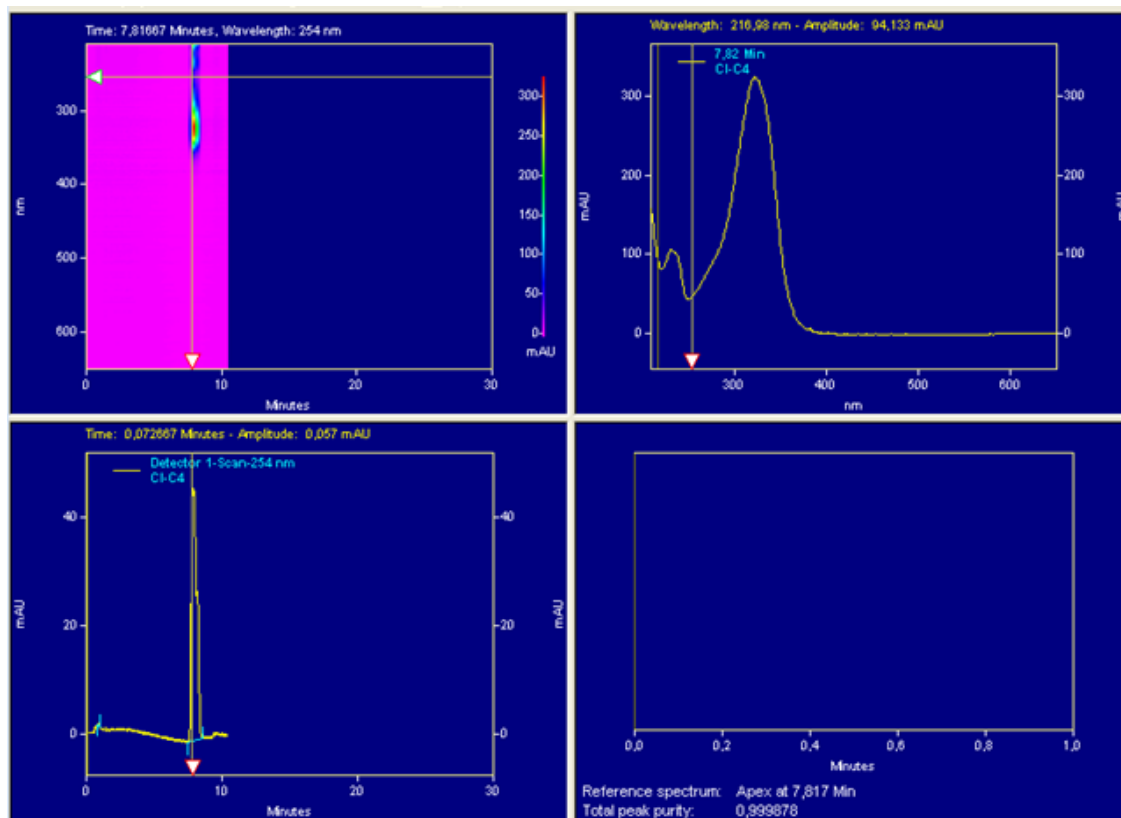

| Retention Time | Area    | Area % | Height | Height % |
|----------------|---------|--------|--------|----------|
| 0.917          | 2313    | 0.17   | 576    | 1.20     |
| 7.817          | 1367307 | 99.83  | 47333  | 98.80    |
| Totals         | 1369620 | 100.00 | 47909  | 100.00   |

Figure S55. HPLC chromatograms of compound 6.

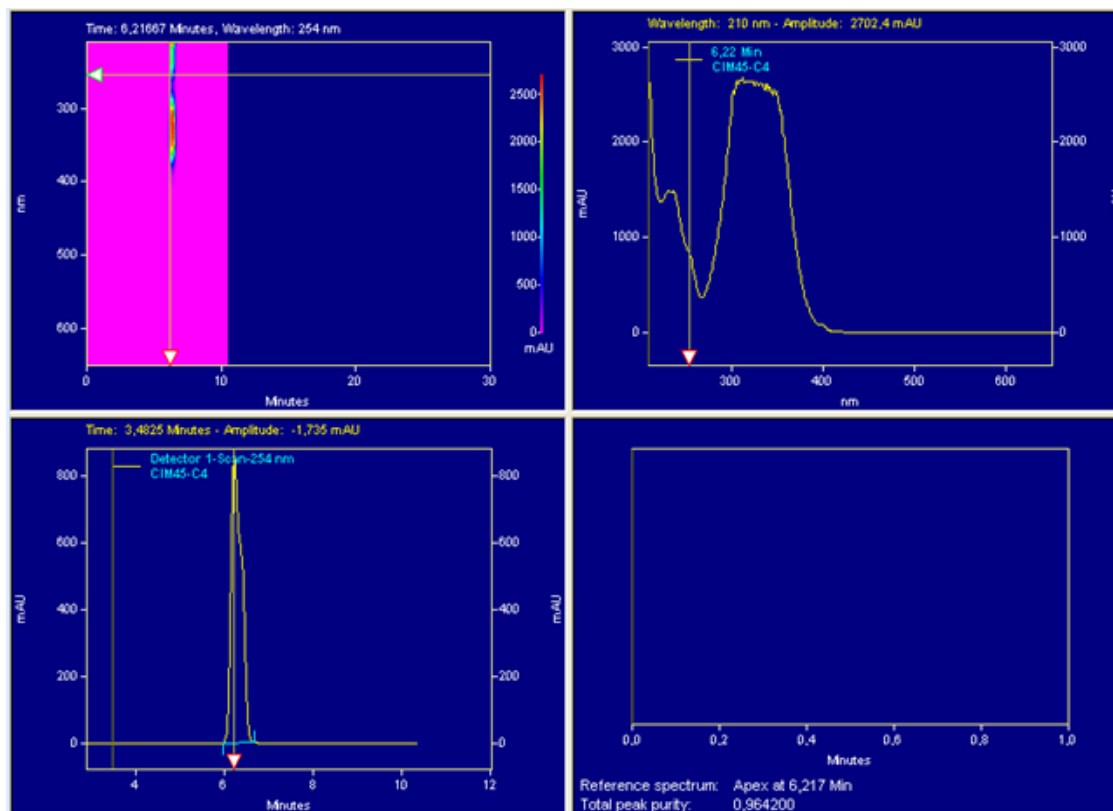

| Retention Time | Area     | Area % | Height | Height % |
|----------------|----------|--------|--------|----------|
| 0.900          | 3303     | 0.02   | 714    | 0.08     |
| 6.217          | 14209543 | 99.98  | 846375 | 99.92    |
| Totals         | 14212846 | 100.00 | 847089 | 100.00   |

Figure S56. HPLC chromatograms of compound 7.

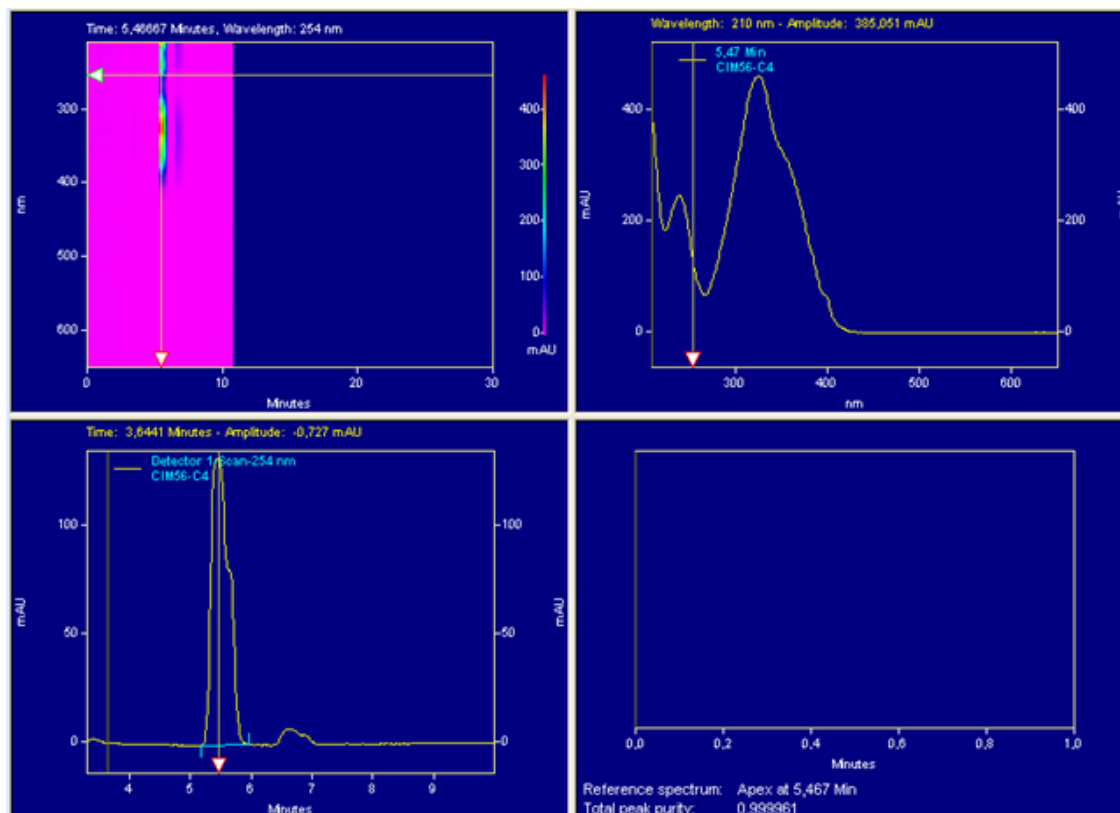

| Retention Time | Area    | Area % | Height | Height % |
|----------------|---------|--------|--------|----------|
| 0.900          | 3149    | 0.12   | 393    | 0.30     |
| 5.467          | 2700329 | 99.88  | 132323 | 99.70    |
| Totals         | 2703478 | 100.00 | 132716 | 100.00   |

Figure S57. HPLC chromatograms of compound 8.

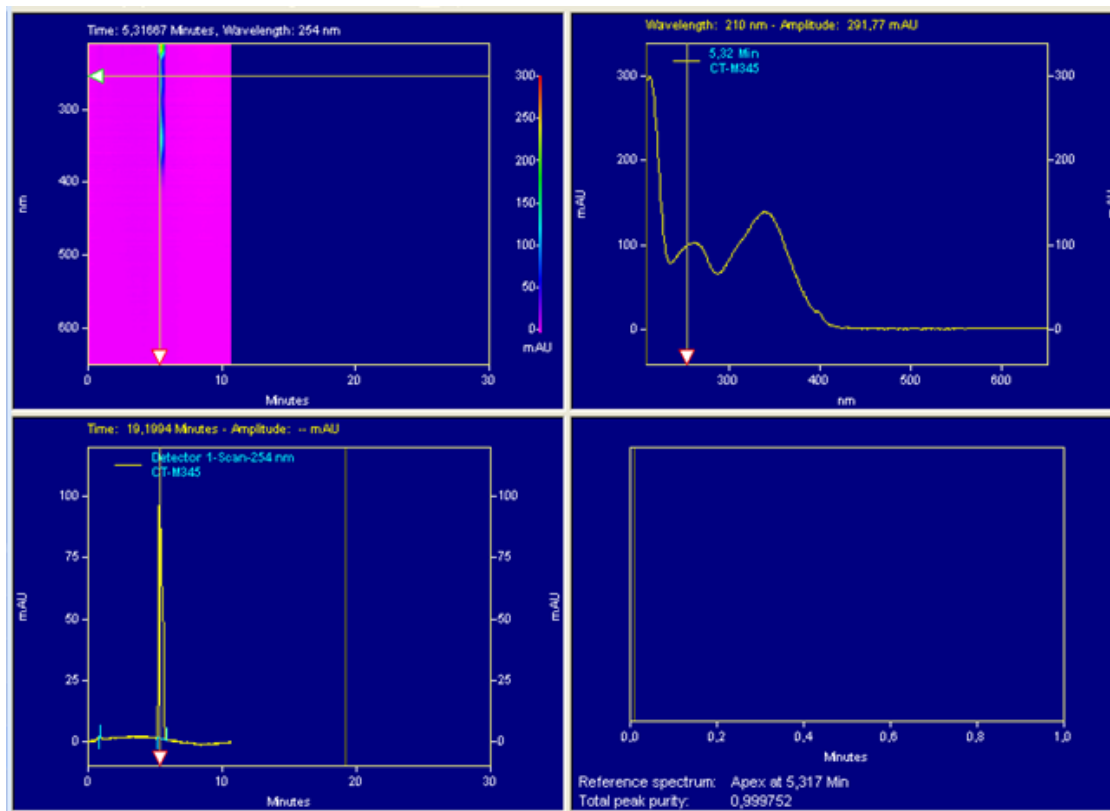

| Retention Time | Area    | Area % | Height | Height % |
|----------------|---------|--------|--------|----------|
| 0.833          | 0       | 0.00   | 0      | 0.00     |
| 5.317          | 1860919 | 100.00 | 97687  | 100.00   |
| Totals         | 1860919 | 100.00 | 97687  | 100.00   |

Figure S58. HPLC chromatograms of compound 9.

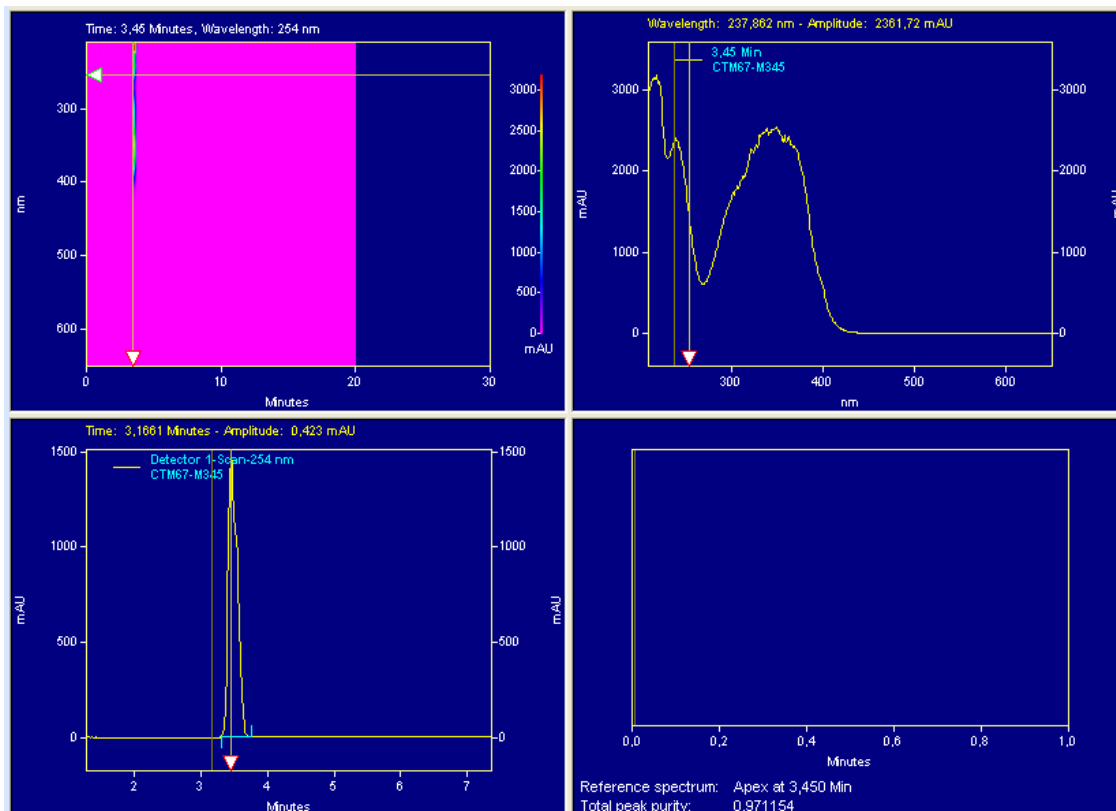

| Retention Time | Area    | Area % | Height  | Height % |
|----------------|---------|--------|---------|----------|
| 0.917          | 6421    | 0.04   | 1630    | 0.11     |
| 3.450          | 1438856 | 99.96  | 1468133 | 99.89    |
| Totals         | 1439498 | 100.00 | 1469763 | 100.00   |

Figure S59. HPLC chromatograms of compound 10.



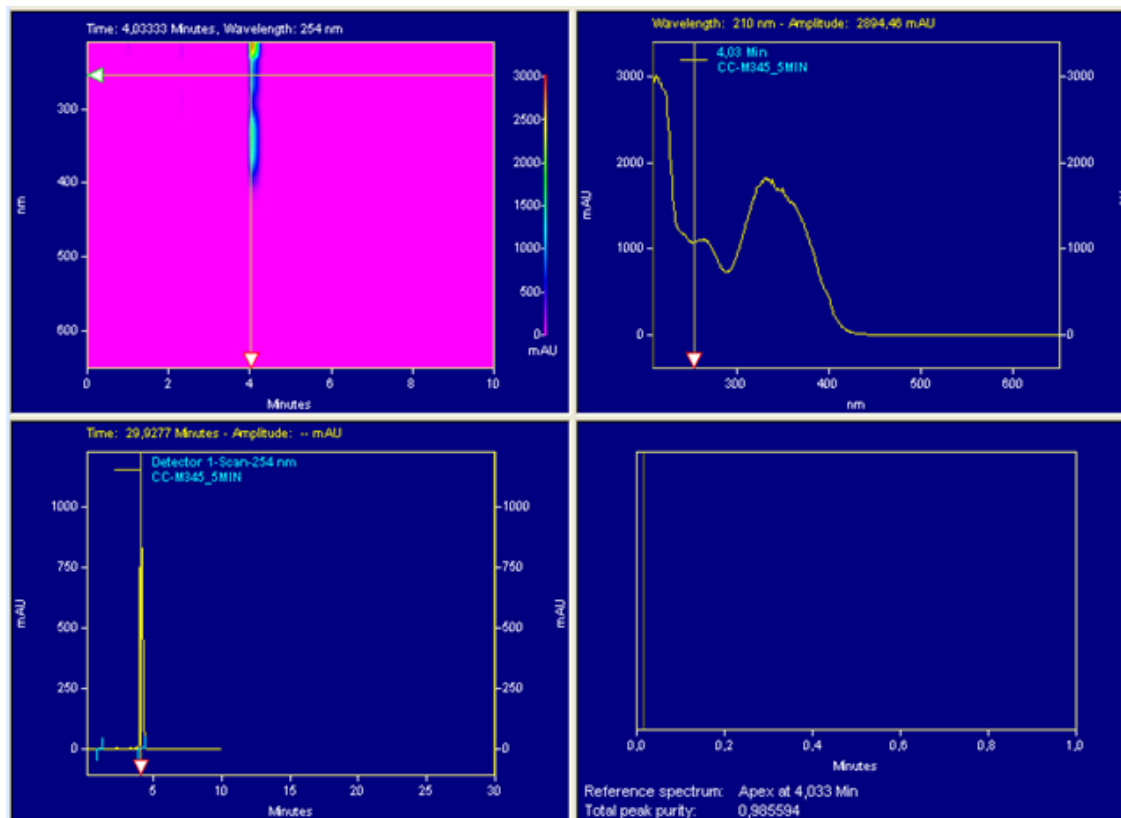

| Retention Time | Area     | Area % | Height  | Height % |
|----------------|----------|--------|---------|----------|
| 1.000          | 33939    | 0.27   | 2999    | 0.28     |
| 4.033          | 12632138 | 99.73  | 1069640 | 99.72    |
| Totals         | 12666077 | 100.00 | 1072639 | 100.00   |

Figure S60. HPLC chromatograms of compound 11.

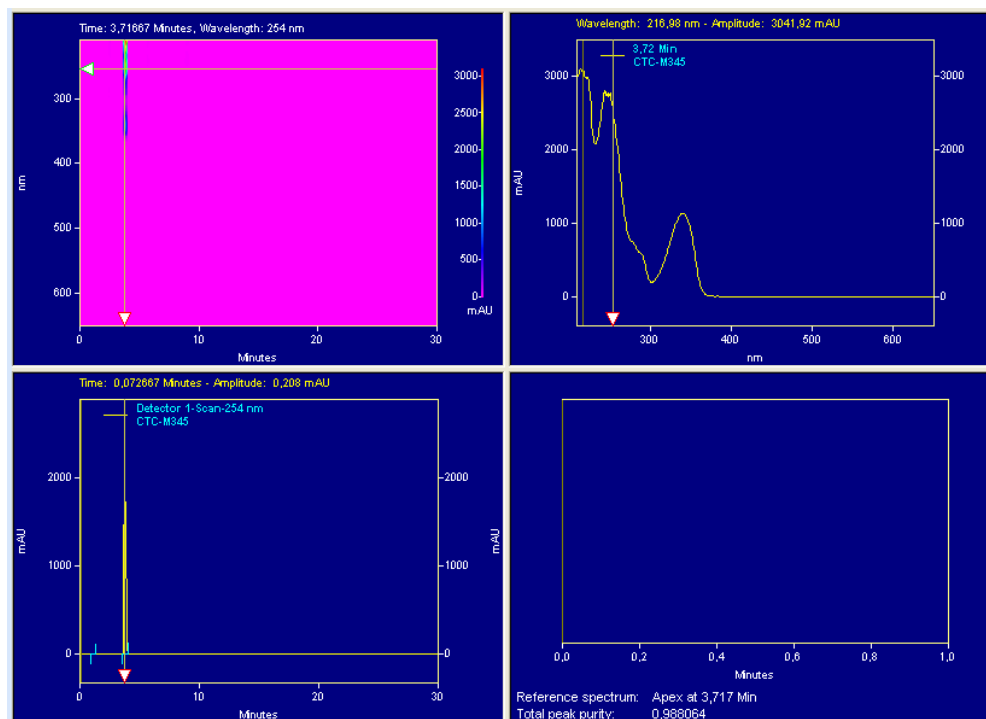

| Retention Time | Area     | Area % | Height  | Height % |
|----------------|----------|--------|---------|----------|
| 1.050          | 50627    | 0.20   | 2061    | 0.08     |
| 3.717          | 24957627 | 99.80  | 2561260 | 99.92    |
| Totals         | 25008254 | 100.00 | 2563321 | 100.00   |

Figure S61. HPLC chromatograms of compound 12.

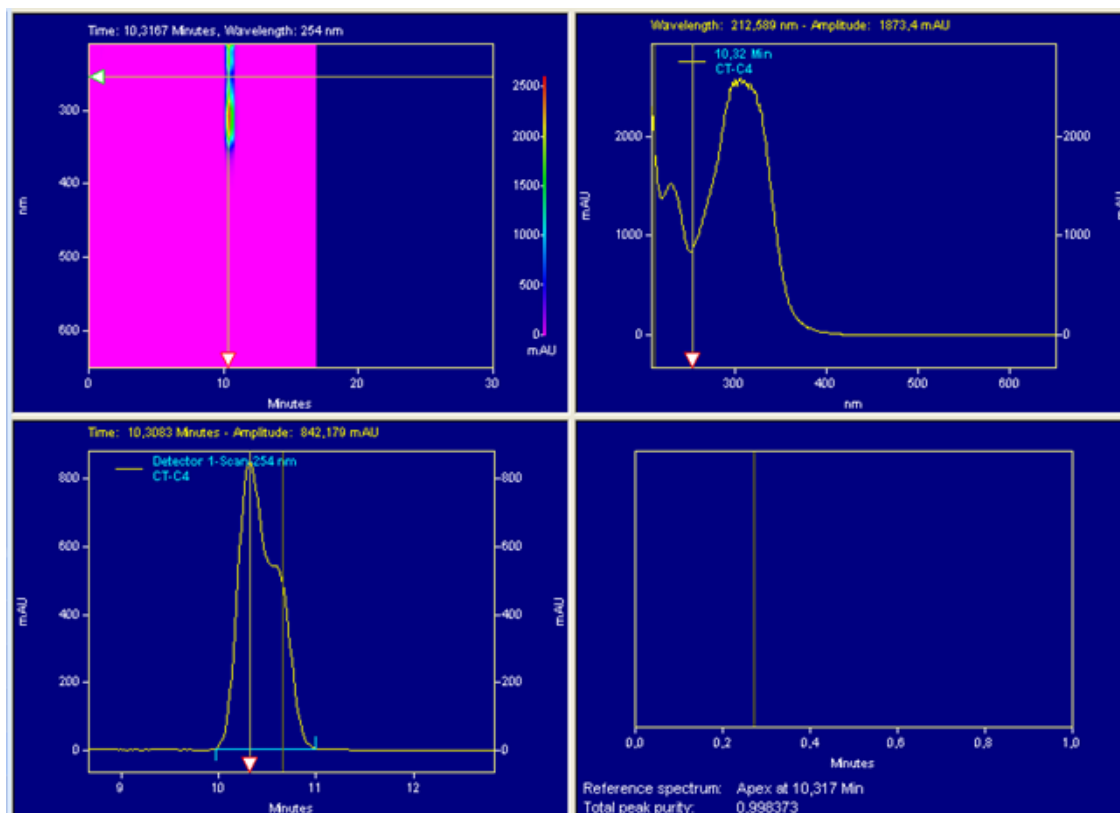

| Retention Time | Area     | Area % | Height | Height % |
|----------------|----------|--------|--------|----------|
| 0.900          | 3256     | 0.01   | 1028   | 0.12     |
| 10.317         | 23084443 | 99.99  | 845811 | 99.88    |
| Totals         | 23087699 | 100.00 | 846839 | 100.00   |

Figure S62. HPLC chromatograms of compound 13.

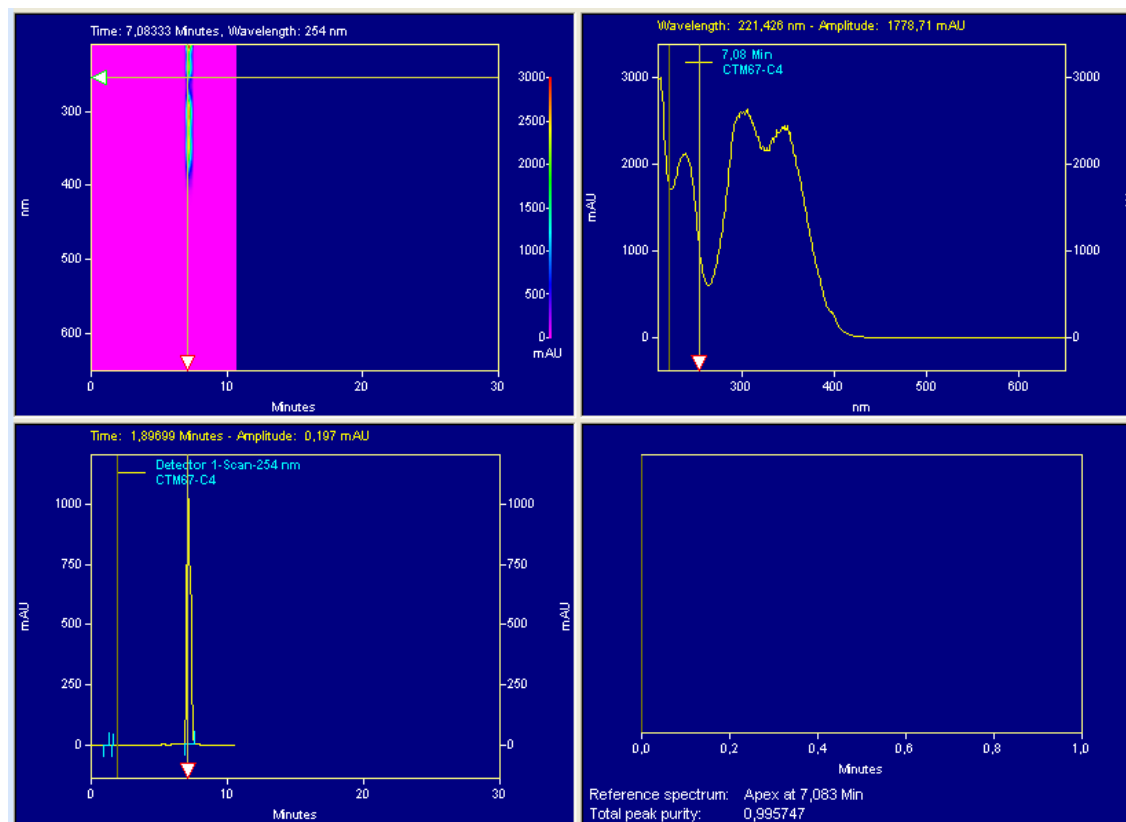

| Retention Time | Area     | Area % | Height  | Height % |
|----------------|----------|--------|---------|----------|
| 0.950          | 34353    | 0.17   | 1204    | 0.11     |
| 1.550          | 679      | 0.00   | 304     | 0.03     |
| 7.083          | 20365893 | 99.83  | 1063338 | 99.86    |
| Totals         | 20400925 | 100.00 | 1064846 | 100.00   |

**Figure S63.** HPLC chromatograms of compound **14**.

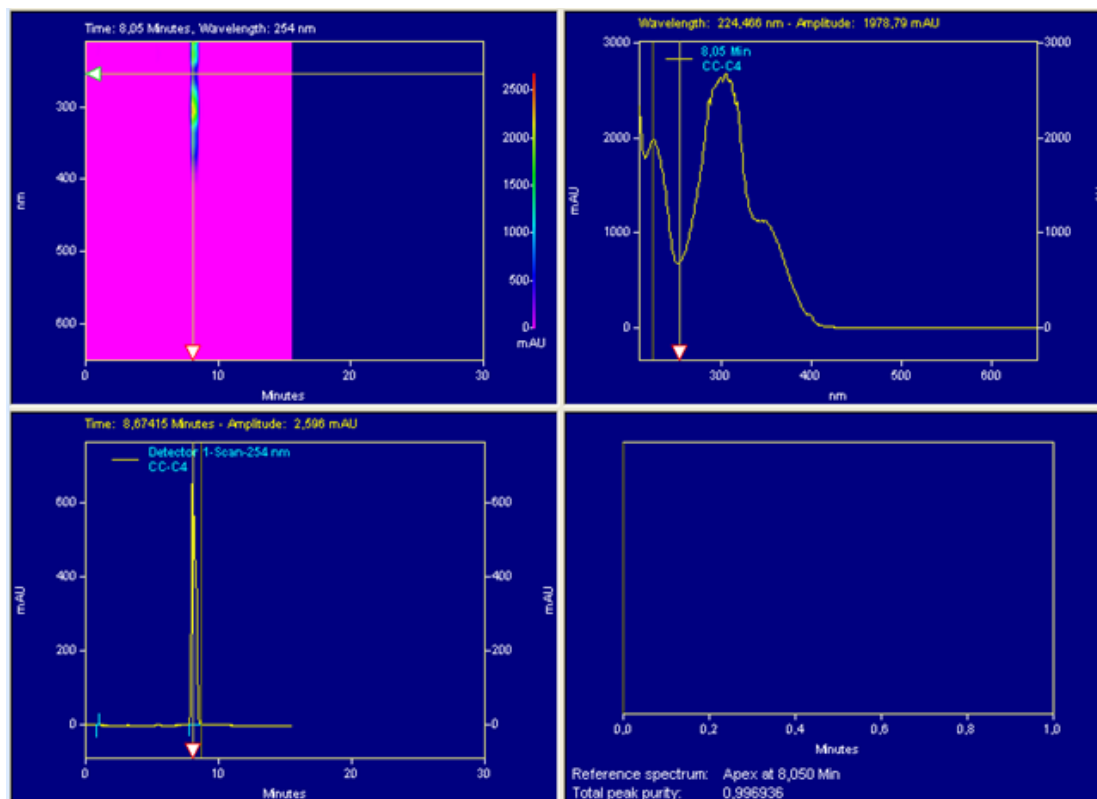

| Retention Time | Area     | Area % | Height | Height % |
|----------------|----------|--------|--------|----------|
| 0.900          | 5145     | 0.04   | 1313   | 0.19     |
| 8.050          | 14415785 | 99.96  | 673782 | 99.81    |
| Totals         | 14420930 | 100.00 | 675095 | 100.00   |

Figure S64. HPLC chromatograms of compound 15.

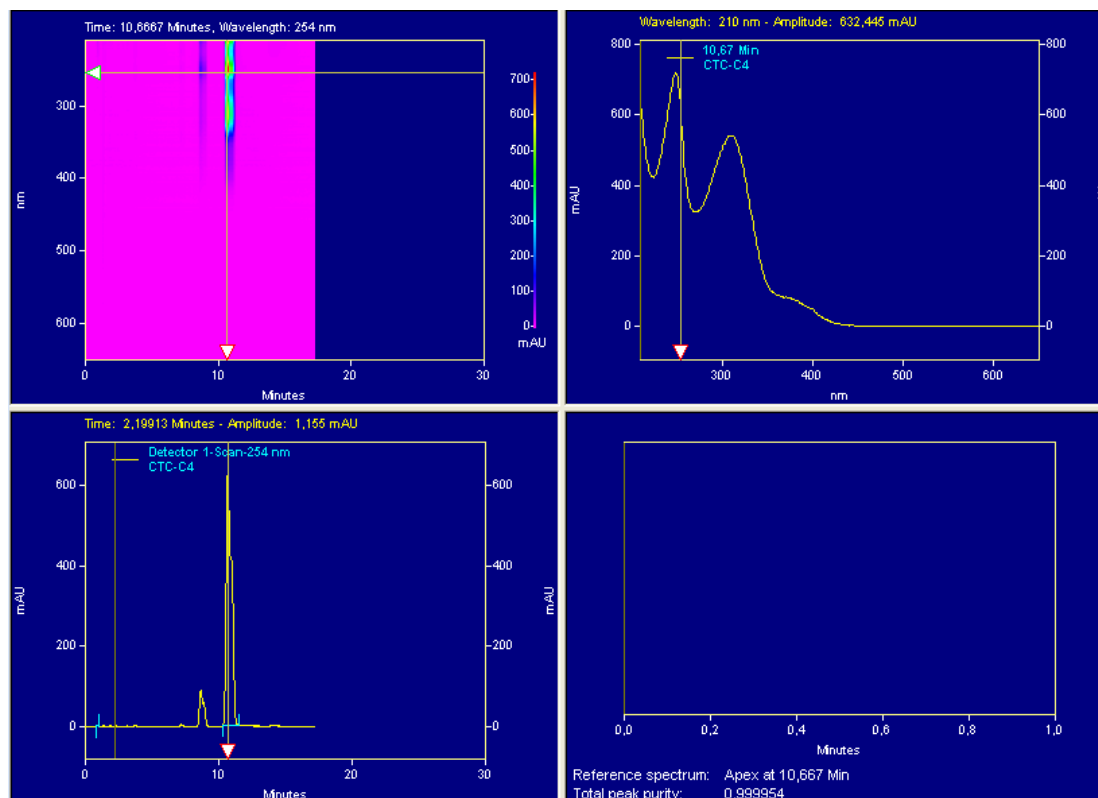

| Retention Time | Area     | Area % | Height | Height % |
|----------------|----------|--------|--------|----------|
| 0.883          | 4713     | 0.03   | 857    | 0.14     |
| 10.667         | 17800466 | 99.97  | 625218 | 99.86    |
| Totals         | 17805179 | 100.00 | 626075 | 100.00   |

**Figure S65.** HPLC chromatograms of compound **16**.

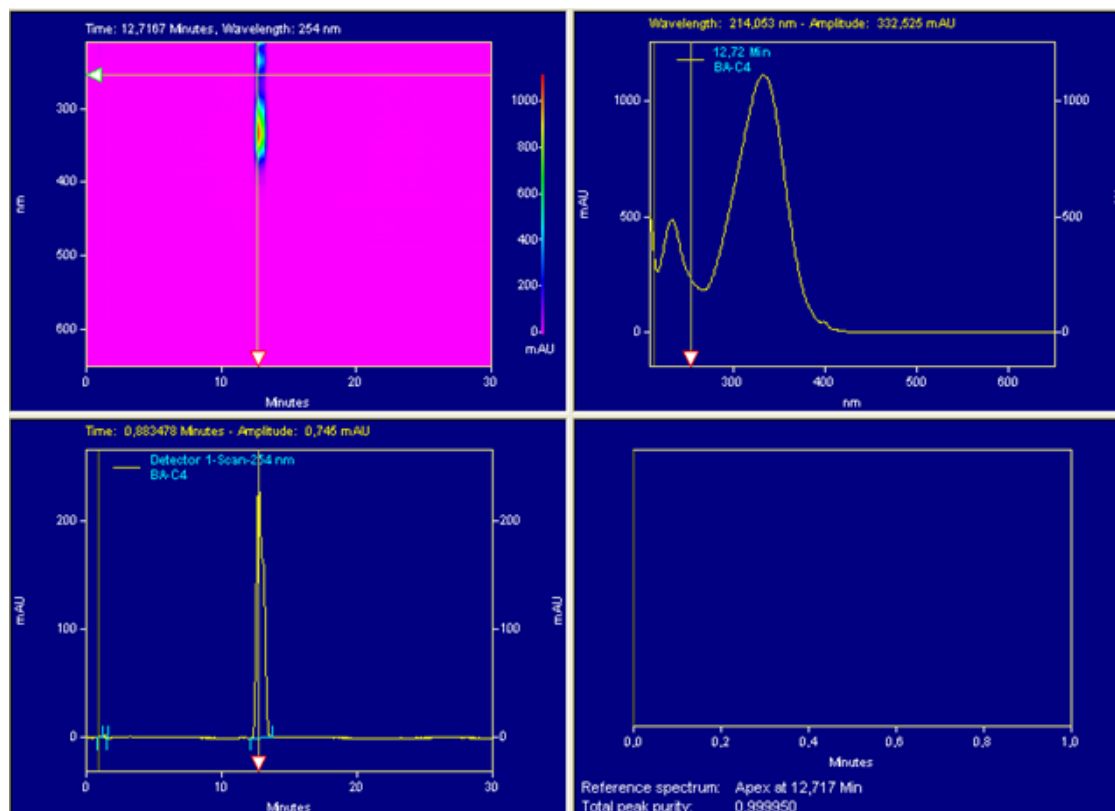

| Retention Time | Area    | Area % | Height | Height % |
|----------------|---------|--------|--------|----------|
| 0.933          | 12287   | 0.15   | 3091   | 1.29     |
| 1.550          | 718     | 0.01   | 246    | 0.10     |
| 12.717         | 8192194 | 99.84  | 235789 | 98.60    |
| Totals         | 8205199 | 100.00 | 239126 | 100.00   |

Figure S66. HPLC chromatograms of compound 17.

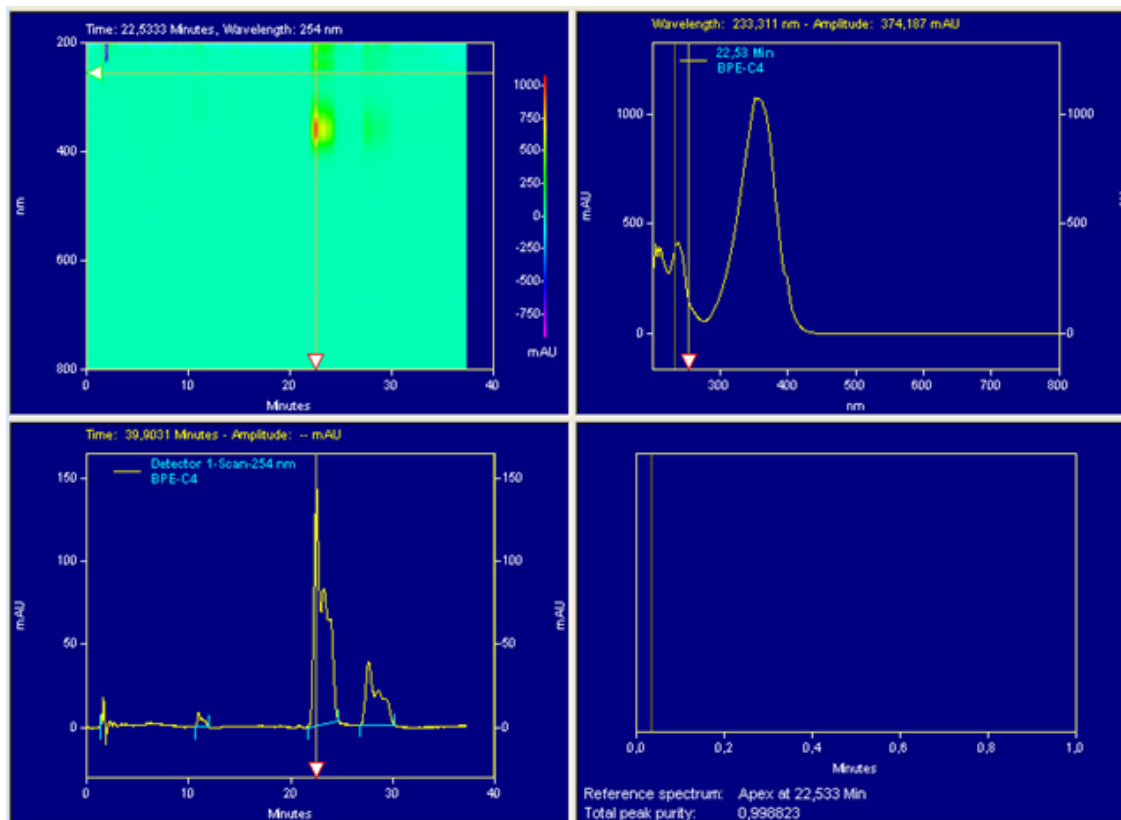

| Retention Time | Area     | Area % | Height | Height % |
|----------------|----------|--------|--------|----------|
| 1.283          | 102      | 0.00   | 102    | 0.05     |
| 10.967         | 307343   | 2.19   | 8638   | 4.53     |
| 22..533        | 13725459 | 97.81  | 182109 | 95.42    |
| Totals         | 14032904 | 100.00 | 190849 | 100.00   |

Figure S67. HPLC chromatograms of compound 18.



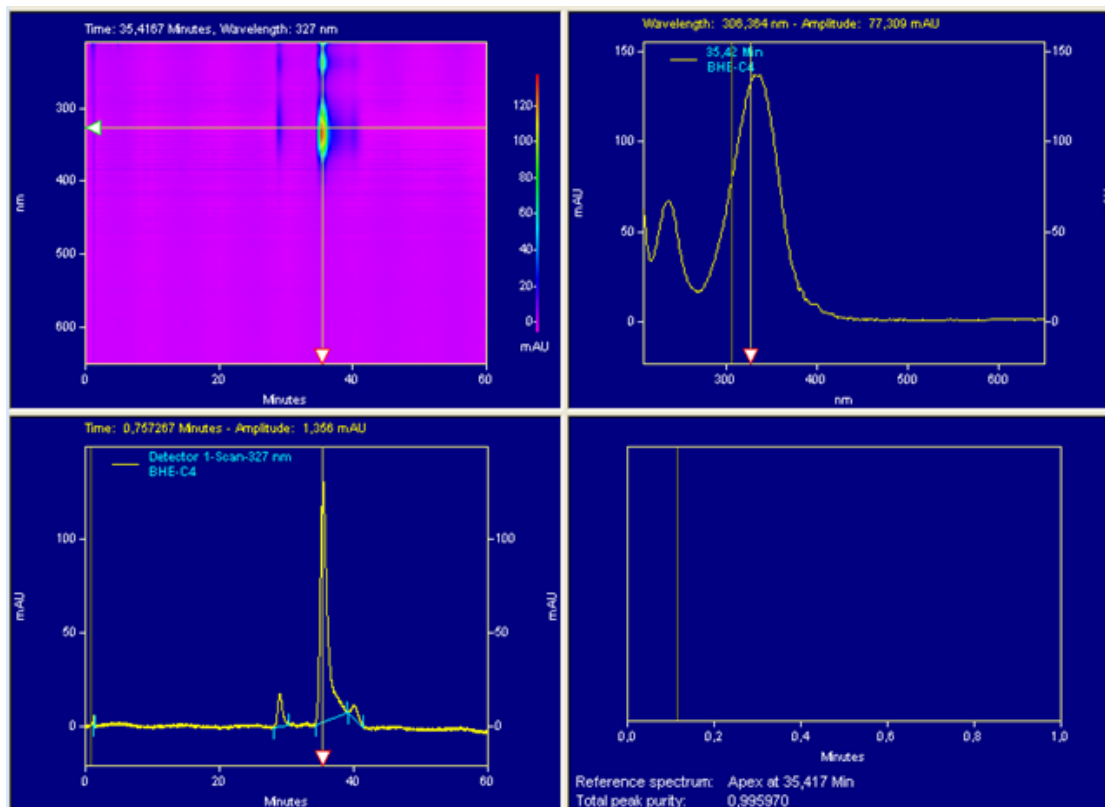

| Retention Time | Area     | Area % | Height   | Height % |
|----------------|----------|--------|----------|----------|
| 28.967         | 223021   | 2.02   | 4383.3   | 2.75     |
| 35.417         | 10677707 | 96.87  | 153533.4 | 96.14    |
| 40.050         | 122834   | 1.11   | 1777.3   | 1.11     |
| Totals         | 11023562 | 100.00 | 159694   | 100.00   |

Figure S68. HPLC chromatograms of compound 19.

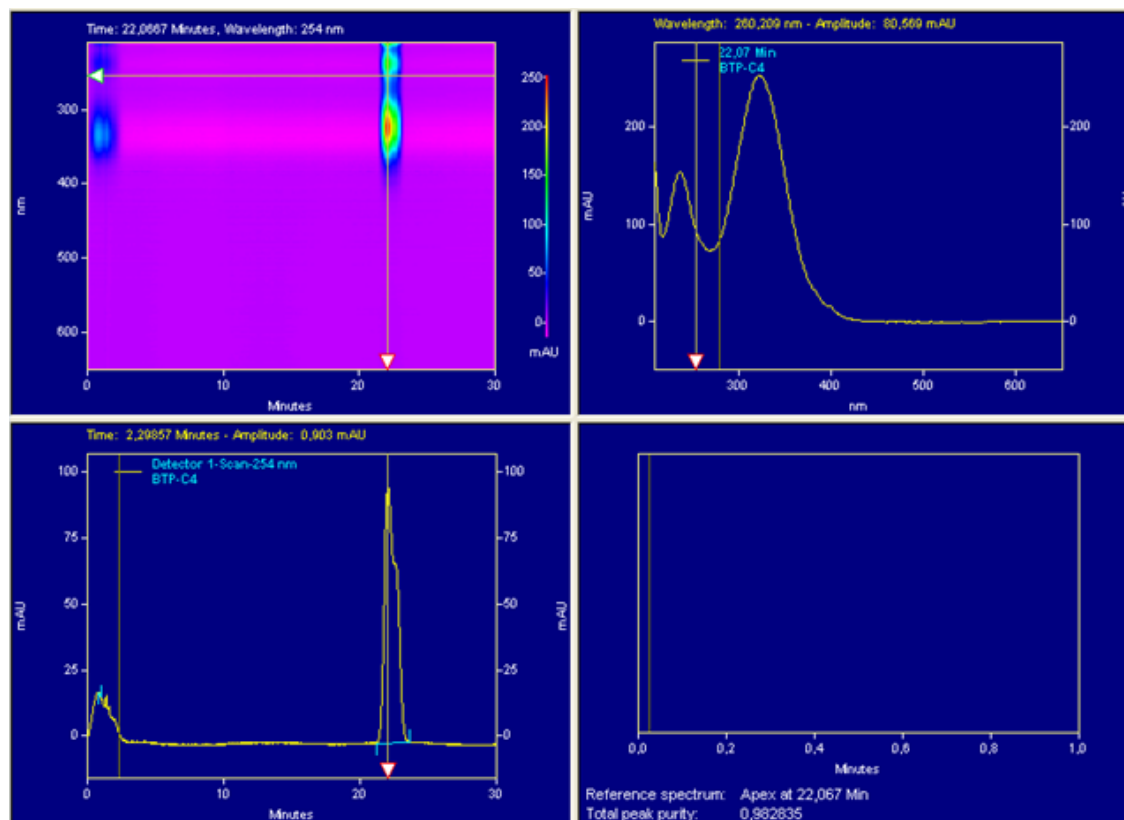

| Retention Time | Area    | Area % | Height | Height % |
|----------------|---------|--------|--------|----------|
| 0.867          | 2865    | 0.05   | 694    | 0.71     |
| 22.067         | 5927590 | 99.95  | 97023  | 99.29    |
| Totals         | 5930455 | 100.00 | 97717  | 100.00   |

Figure S69. HPLC chromatograms of compound 20.

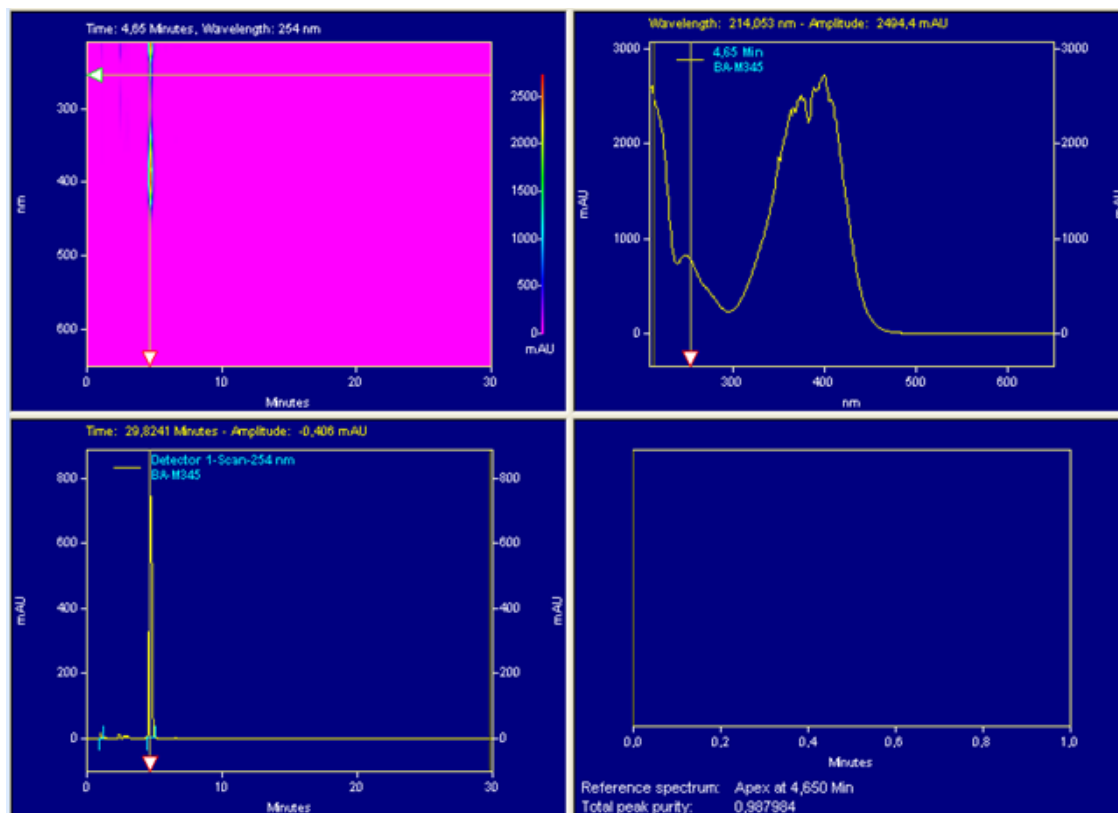

| Retention Time | Area     | Area % | Height | Height % |
|----------------|----------|--------|--------|----------|
| 1.017          | 47698    | 0.45   | 17153  | 2.14     |
| 4.650          | 10511125 | 99.55  | 783993 | 97.86    |
| Totals         | 1.017    | 47698  | 0.45   | 17153    |

Figure S70. HPLC chromatograms of compound 21.

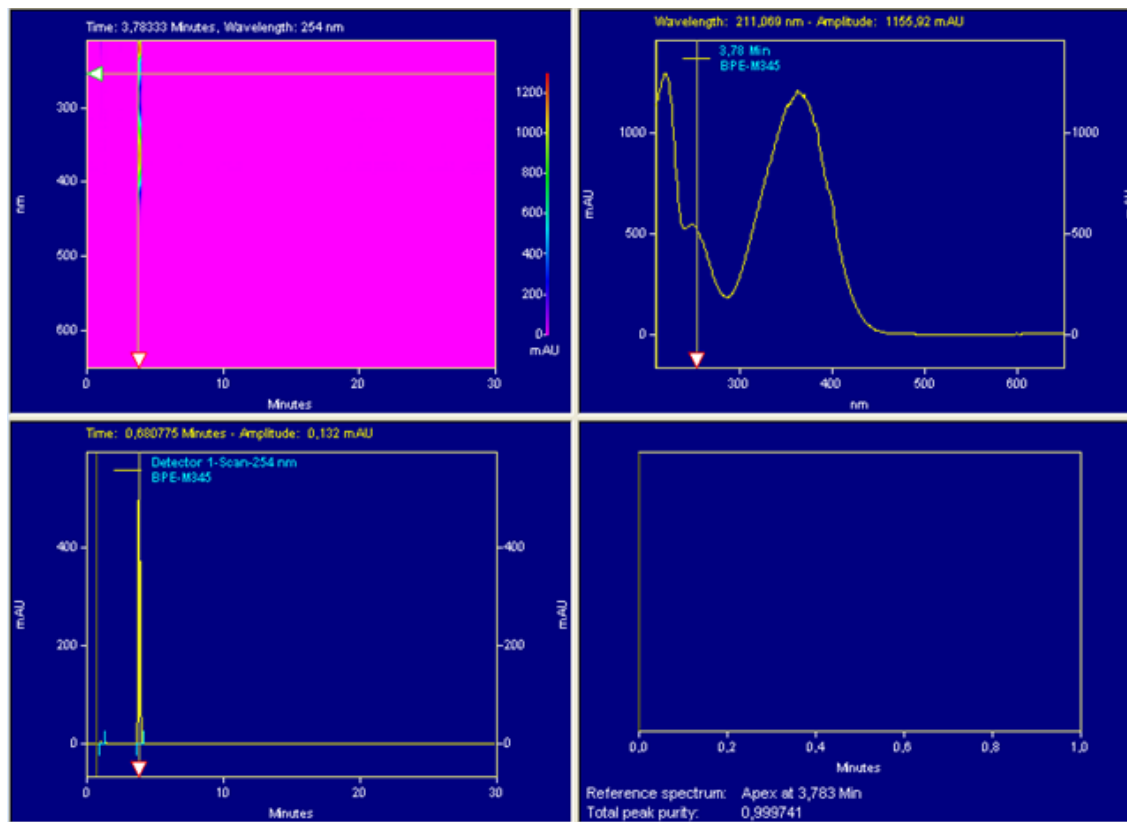

| Retention Time | Area    | Area % | Height | Height % |
|----------------|---------|--------|--------|----------|
| 0.983          | 23362   | 0.41   | 6624   | 1.24     |
| 3.783          | 5716778 | 99.59  | 526936 | 98.76    |
| Totals         | 5740140 | 100.00 | 533560 | 100.00   |

Figure S71. HPLC chromatograms of compound 22.

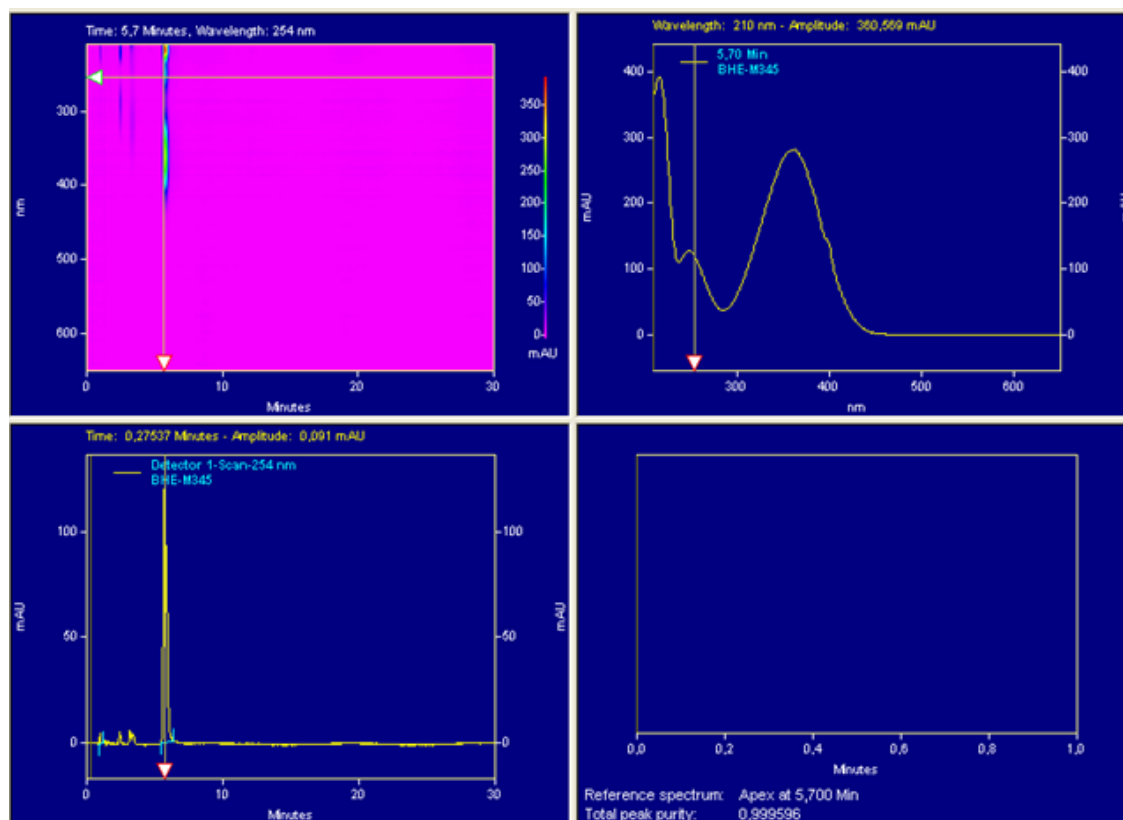

| Retention Time | Area    | Area % | Height | Height % |
|----------------|---------|--------|--------|----------|
| 0.967          | 21613   | 1.03   | 5243   | 4.17     |
| 5.700          | 2069200 | 98.97  | 120581 | 95.83    |
| Totals         | 2090813 | 100.00 | 125824 | 100.00   |

Figure S72. HPLC chromatograms of compound 23.

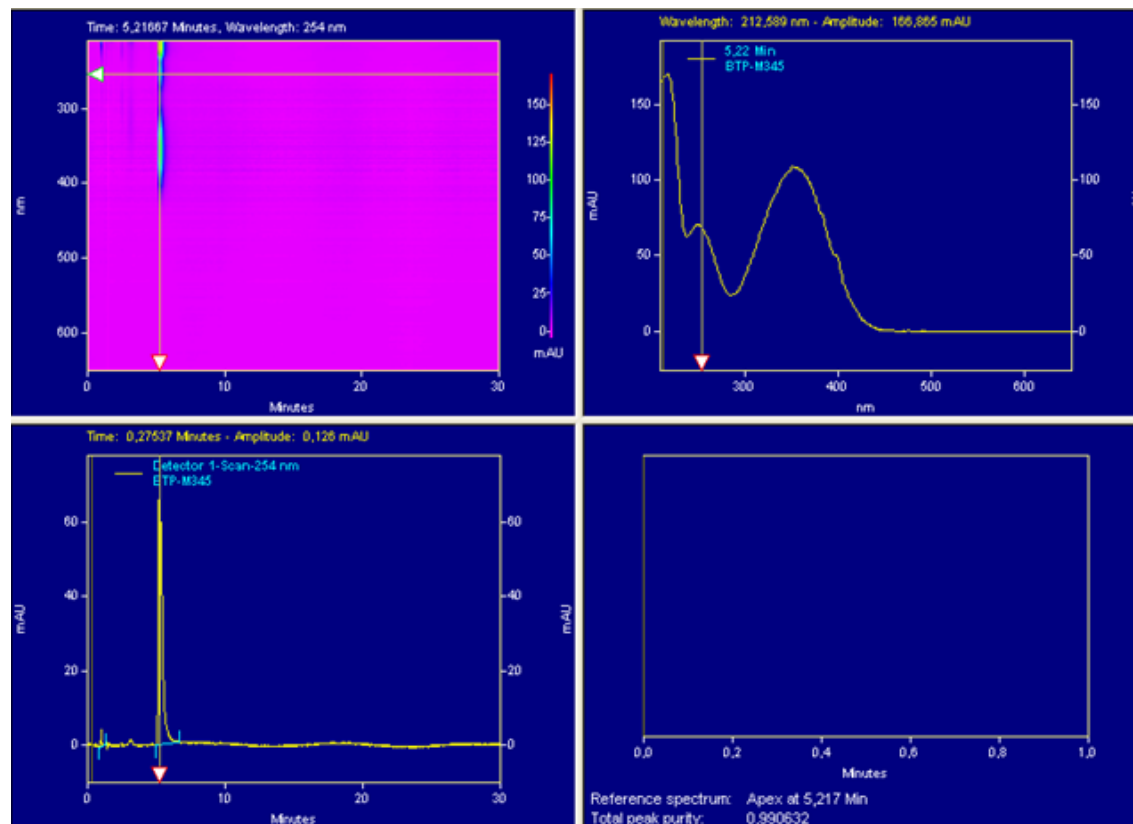

| Retention Time | Area    | Area % | Height | Height % |
|----------------|---------|--------|--------|----------|
| 0.967          | 20869   | 1.51   | 4685   | 3.35     |
| 5.217          | 1362960 | 98.49  | 69143  | 96.65    |
| Totals         | 1383829 | 100.00 | 73828  | 100.00   |

Figure S73. HPLC chromatograms of compound 24.

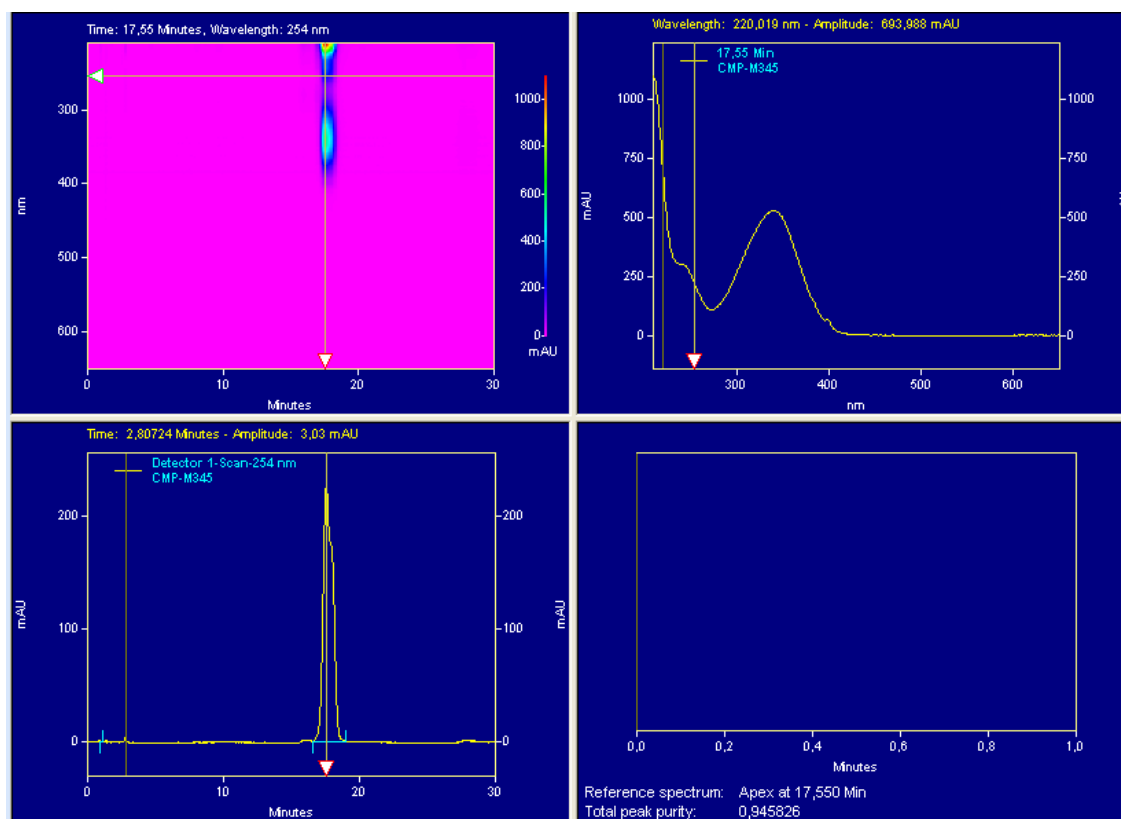

| Retention Time | Area     | Area % | Height | Height % |
|----------------|----------|--------|--------|----------|
| 0.900          | 5302     | 0.05   | 1228   | 0.54     |
| 17.550         | 11328259 | 99.95  | 226418 | 99.46    |
| Totals         | 11333561 | 100.00 | 227646 | 100.00   |

**Figure S74.** HPLC chromatograms of compound **26**.

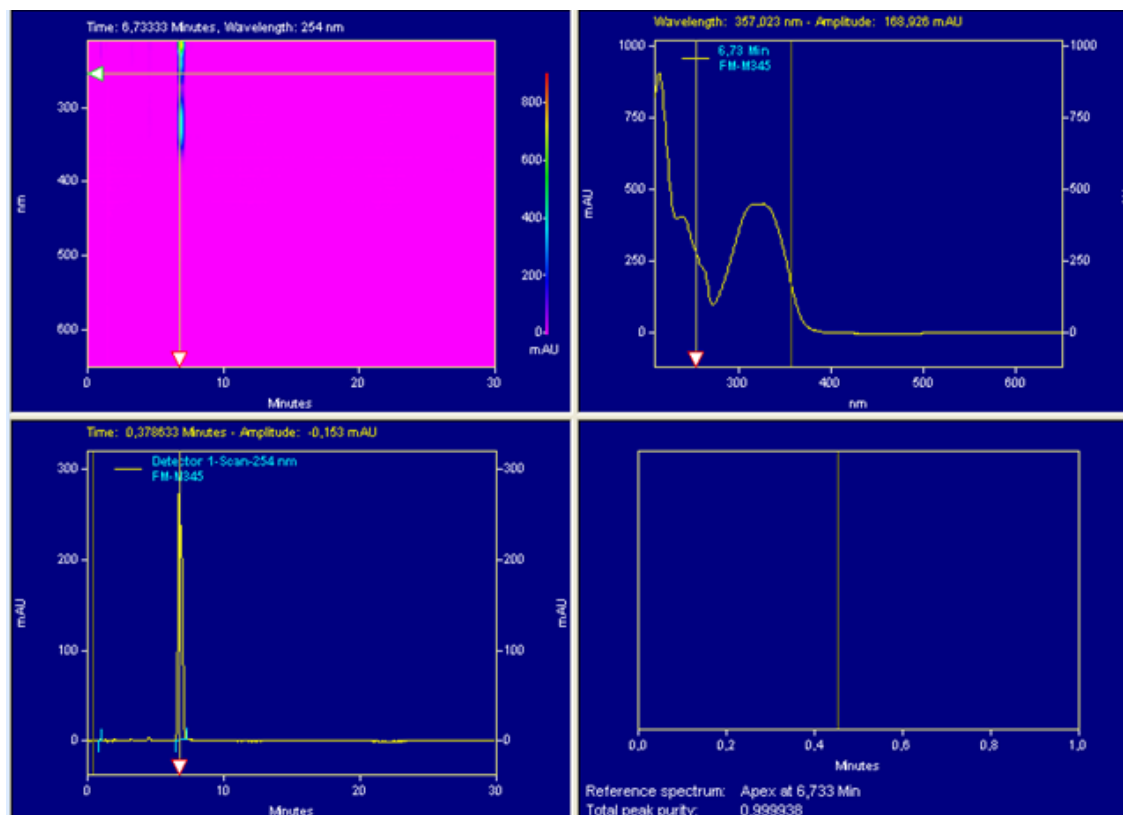

| Retention Time | Area    | Area % | Height | Height % |
|----------------|---------|--------|--------|----------|
| 0.917          | 10451   | 0.19   | 2253   | 0.79     |
| 6.733          | 5459800 | 99.81  | 283109 | 99.21    |
| Totals         | 5470251 | 100.00 | 285362 | 100.00   |

Figure S75. HPLC chromatograms of compound 27.



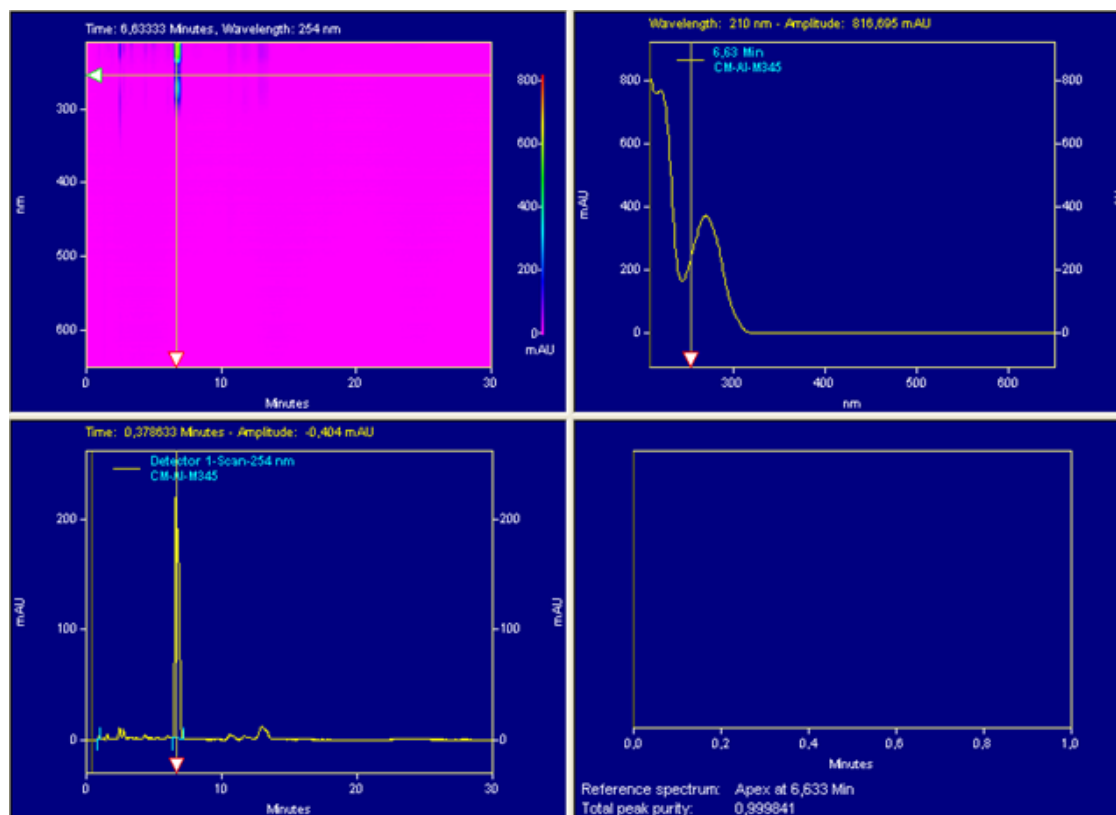

| Retention Time | Area    | Area % | Height | Height % |
|----------------|---------|--------|--------|----------|
| 0.883          | 7342    | 0.17   | 1902   | 0.82     |
| 6.633          | 4339688 | 99.83  | 231323 | 99.18    |
| Totals         | 4347030 | 100.00 | 233225 | 100.00   |

Figure S76. HPLC chromatograms of compound 28.

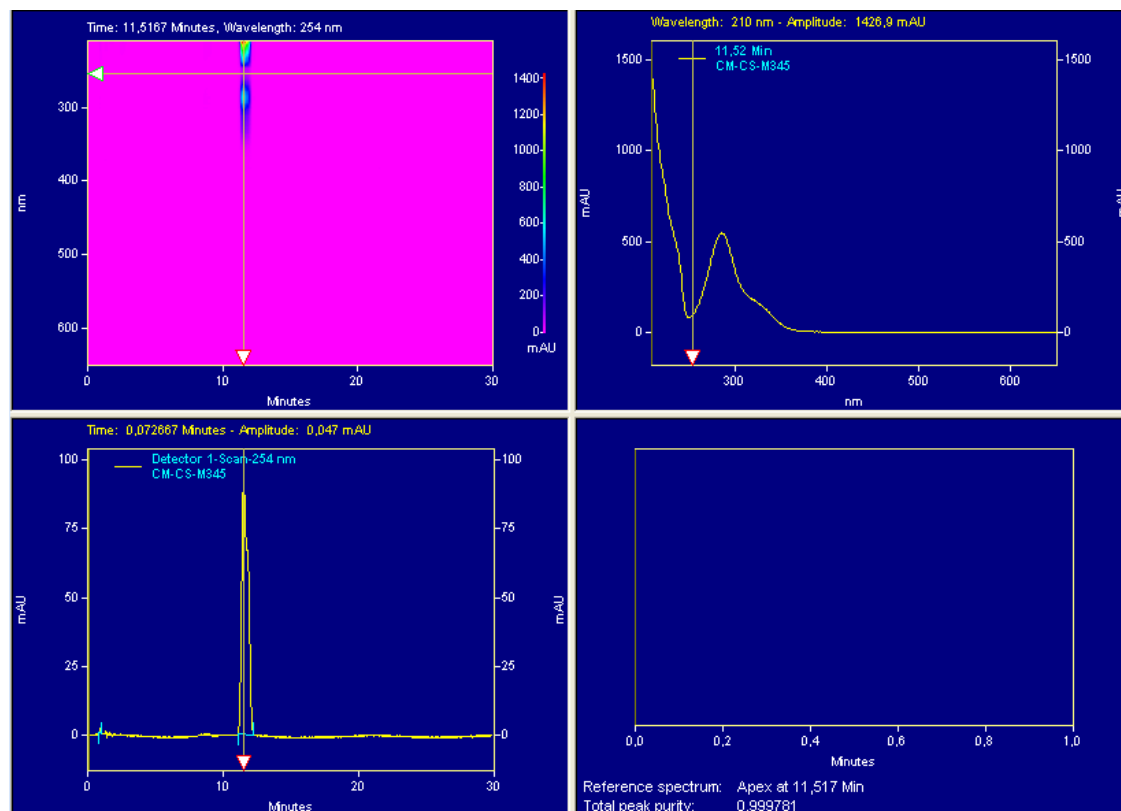

| Retention Time | Area    | Area % | Height | Height % |
|----------------|---------|--------|--------|----------|
| 0.883          | 5257    | 0.18   | 1392   | 1.49     |
| 11.517         | 2959126 | 99.82  | 91793  | 98.51    |
| Totals         | 2964383 | 100.00 | 93185  | 100.00   |

Figure S77. HPLC chromatograms of compound 29.

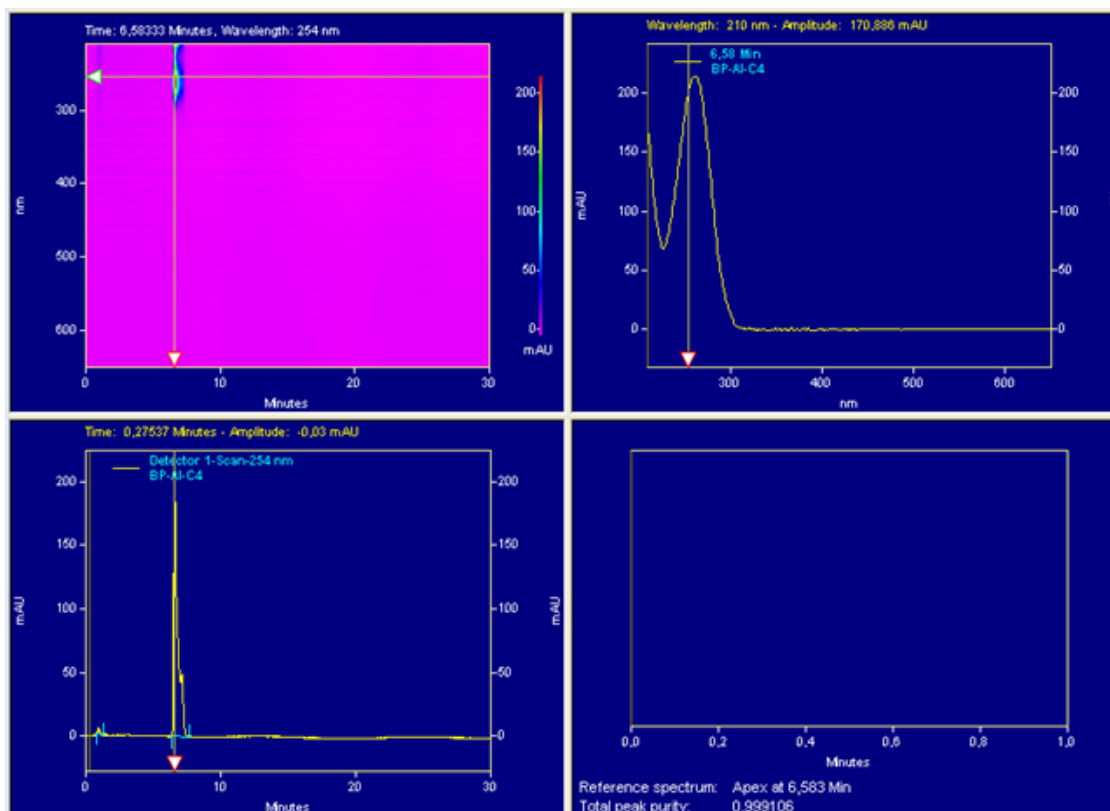

| Retention Time | Area    | Area % | Height | Height % |
|----------------|---------|--------|--------|----------|
| 0.917          | 44732   | 1.07   | 4789   | 2.35     |
| 6.583          | 4146238 | 98.93  | 199051 | 97.65    |
| Totals         | 4190970 | 100.00 | 203840 | 100.00   |

Figure S78. HPLC chromatograms of compound 30.

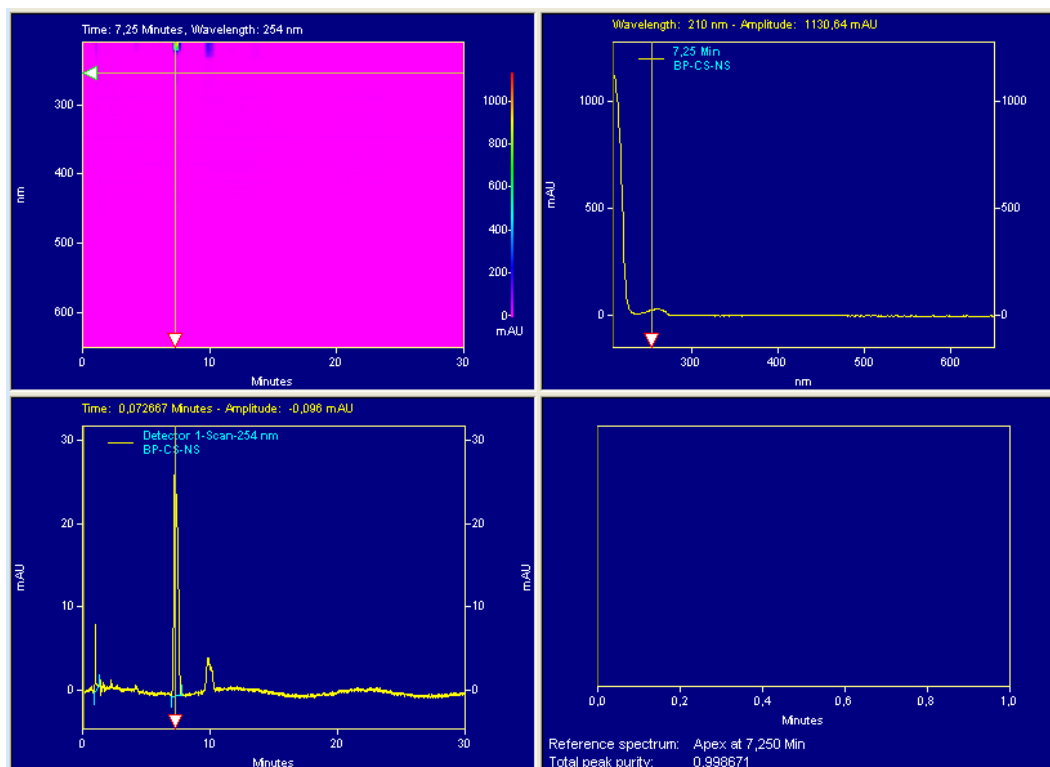

| Retention Time | Area   | Area % | Height | Height % |
|----------------|--------|--------|--------|----------|
| 1.000          | 23647  | 3.97   | 8047   | 1.85     |
| 7.250          | 572030 | 96.03  | 28773  | 98.15    |
| Totals         | 595677 | 100.00 | 36820  | 100.00   |

Figure S79. HPLC chromatograms of compound 31.

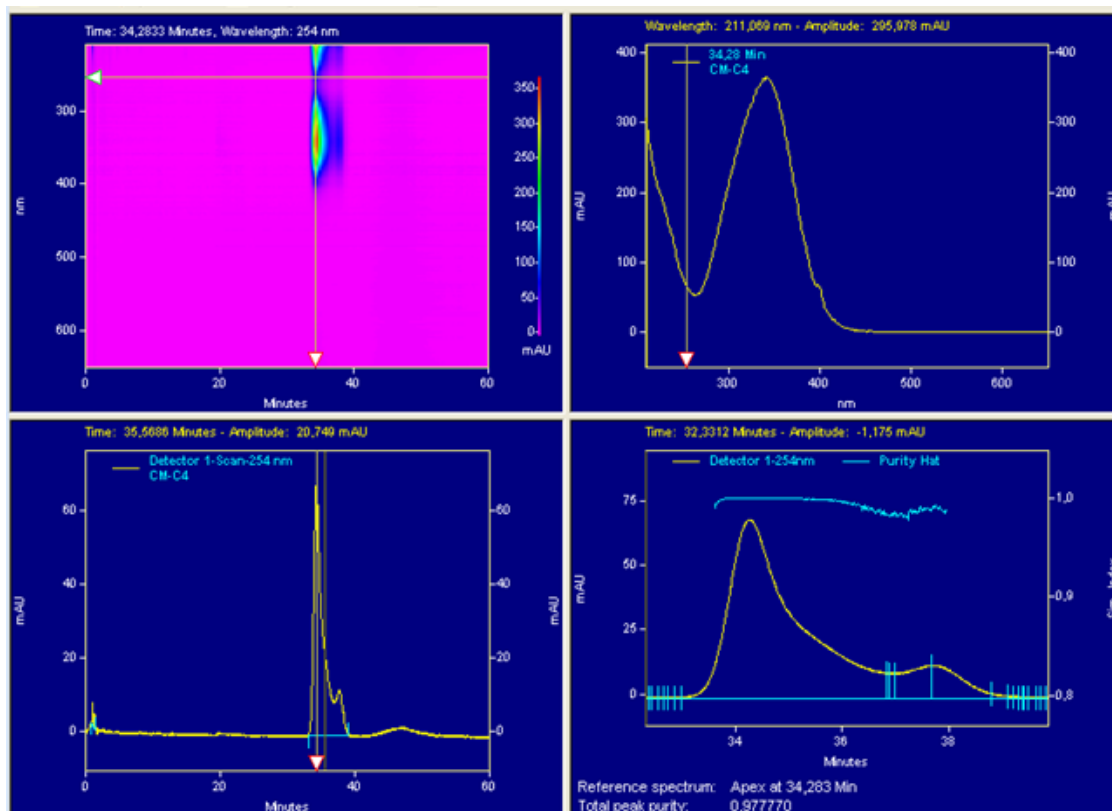

| Retention Time | Area    | Area % | Height | Height % |
|----------------|---------|--------|--------|----------|
| 0.983          | 56794   | 0.80   | 6033   | 4.07     |
| 34.283         | 7012429 | 99.20  | 68754  | 95.93    |
| Totals         | 7069223 | 100.00 | 74787  | 100.00   |

Figure S80. HPLC chromatograms of compound 32.

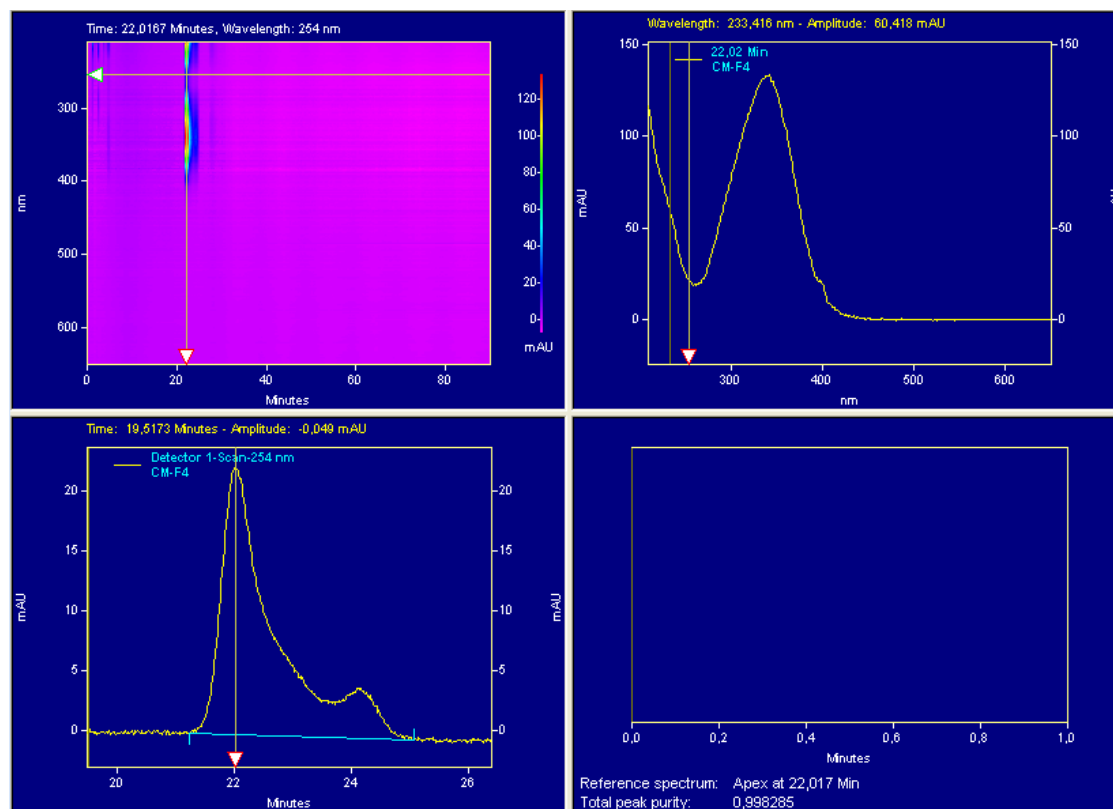

| Retention Time | Area    | Area % | Height | Height % |
|----------------|---------|--------|--------|----------|
| 0.967          | 28254   | 1.94   | 4474   | 3.59     |
| 22.017         | 1429675 | 98.06  | 22490  | 96.41    |
| Totals         | 1457929 | 100.00 | 26964  | 100.00   |

Figure S81. HPLC chromatograms of compound 33.

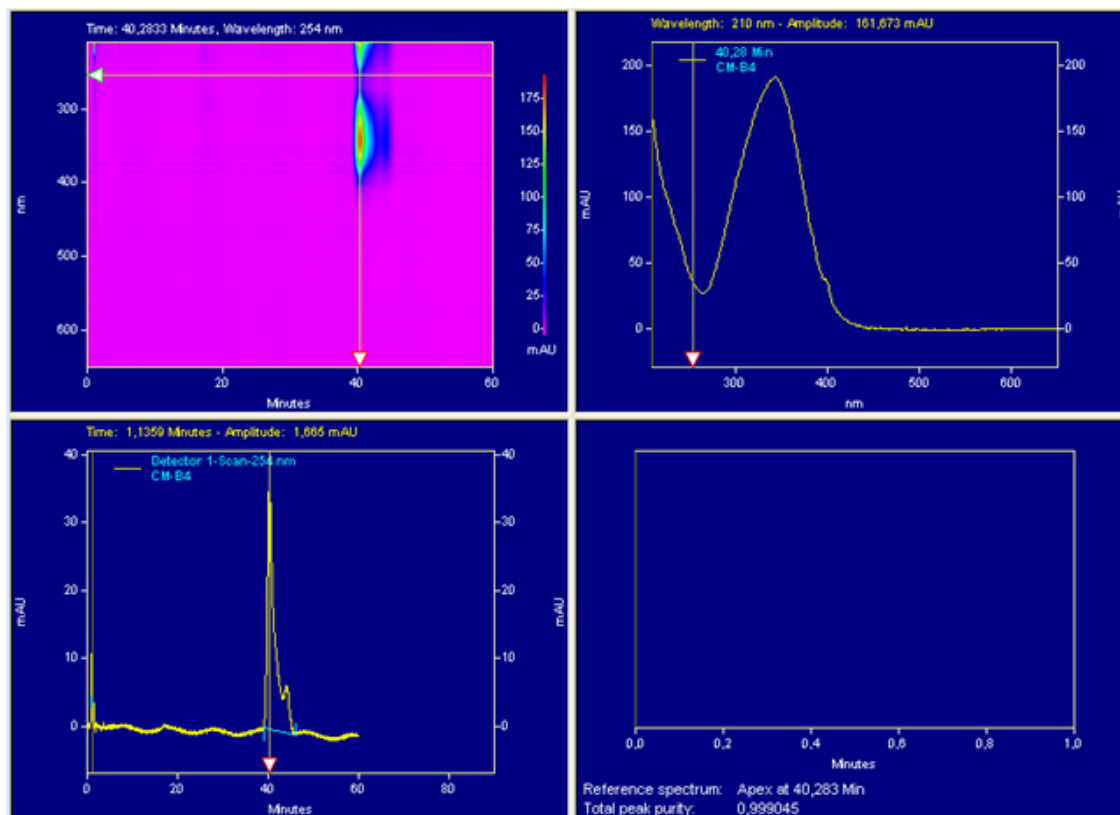

| Retention Time | Area    | Area % | Height | Height % |
|----------------|---------|--------|--------|----------|
| 0.950          | 42824   | 0.99   | 7354   | 3.85     |
| 40.283         | 4297208 | 99.01  | 36286  | 96.15    |
| Totals         | 4340032 | 100.00 | 43640  | 100.00   |

Figure S82. HPLC chromatograms of compound 34.

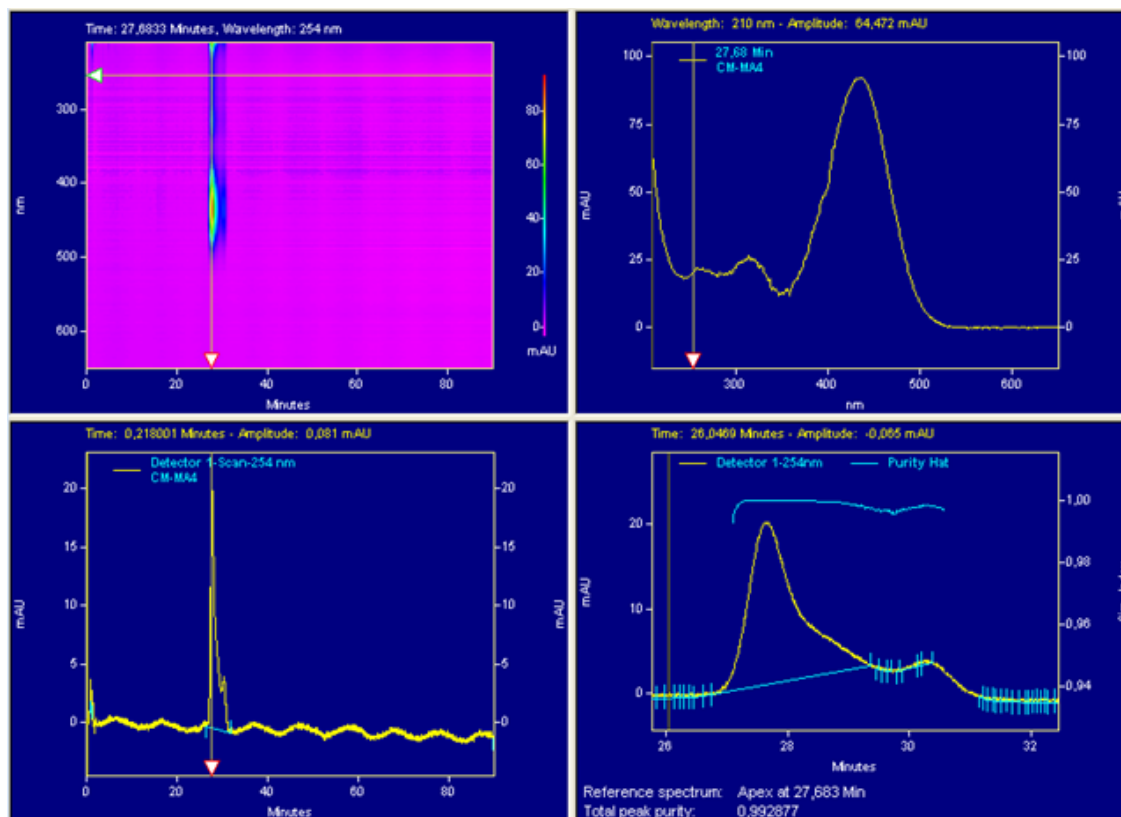

| Retention Time | Area    | Area % | Height | Height % |
|----------------|---------|--------|--------|----------|
| 27.683         | 1787594 | 99.95  | 23103  | 98.72    |
| 89.867         | 903     | 0.05   | 300    | 1.28     |
| Totals         | 1788497 | 100.00 | 23403  | 100.00   |

Figure S83. HPLC chromatograms of compound 35.



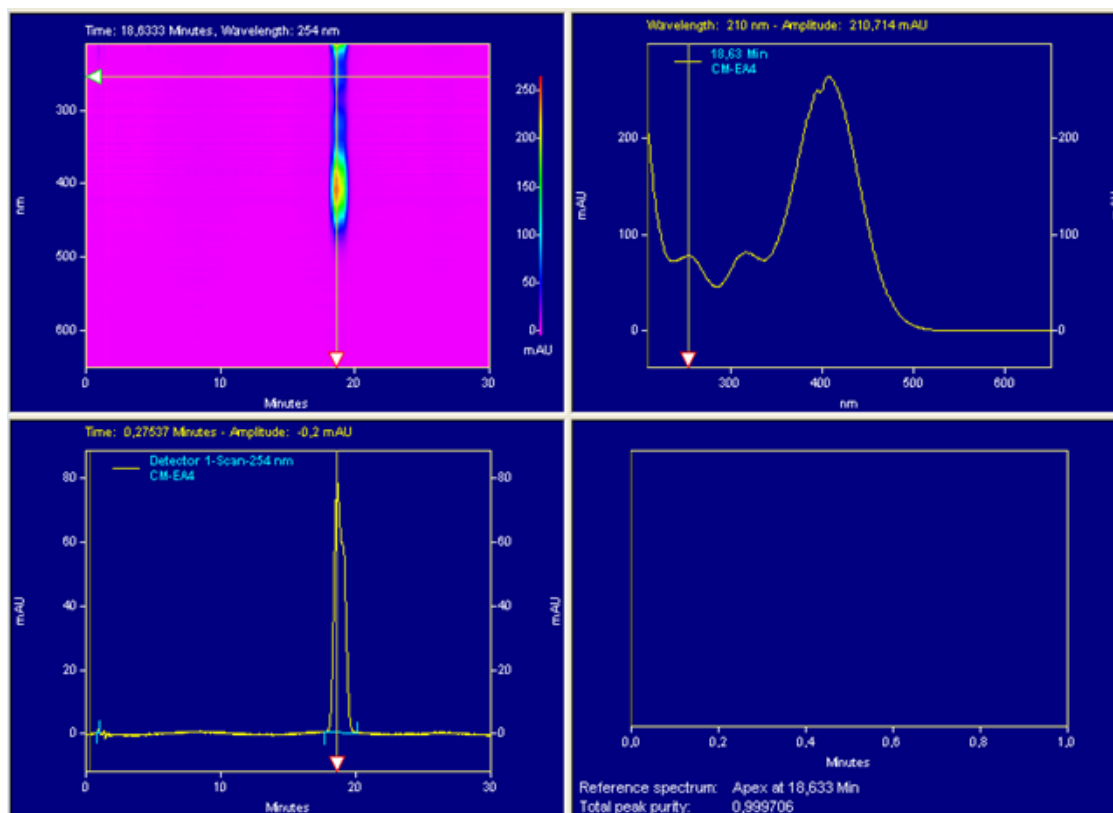

| Retention Time | Area    | Area % | Height | Height % |
|----------------|---------|--------|--------|----------|
| 0.900          | 3643    | 0.09   | 1184   | 1.49     |
| 18.633         | 4076638 | 99.91  | 78183  | 98.51    |
| Totals         | 4080281 | 100.00 | 79367  | 100.00   |

Figure S84. HPLC chromatograms of compound 36.

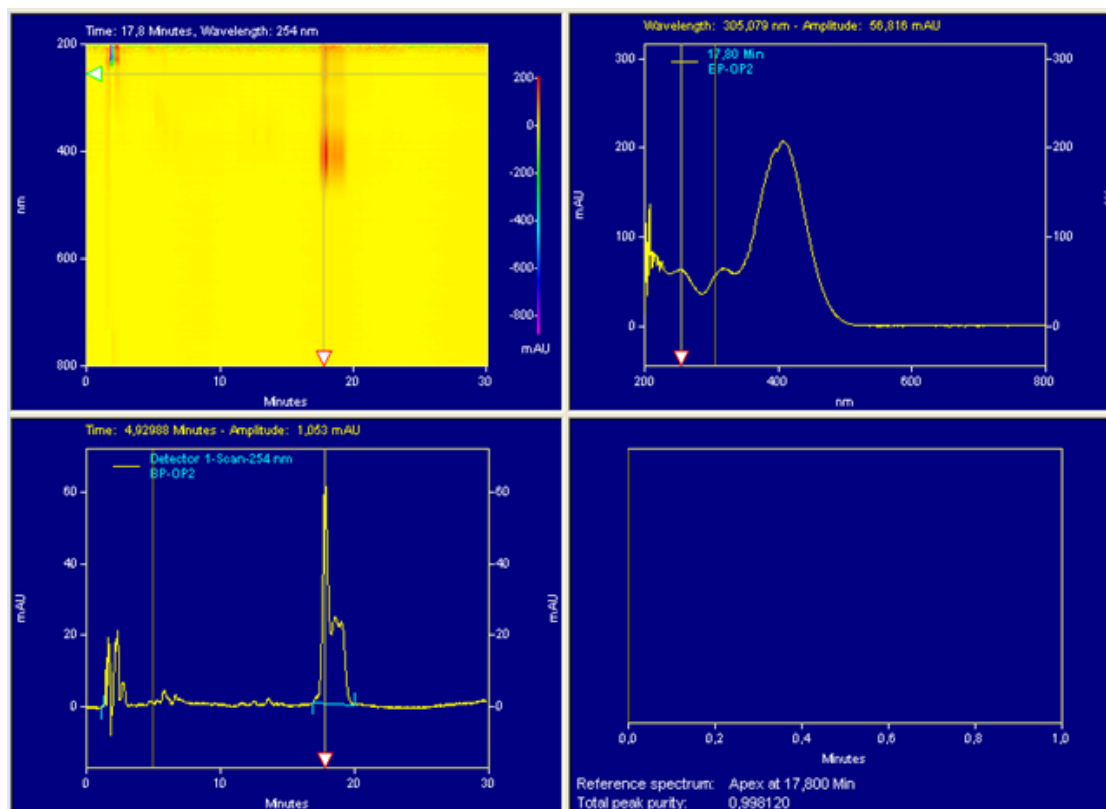

| Retention Time | Area    | Area % | Height | Height % |
|----------------|---------|--------|--------|----------|
| 1.250          | 3282    | 0.10   | 498    | 0.79     |
| 17.800         | 3362216 | 99.90  | 62309  | 99.21    |
| Totals         | 3365498 | 100.00 | 62807  | 100.00   |

Figure S85. HPLC chromatograms of compound 38.

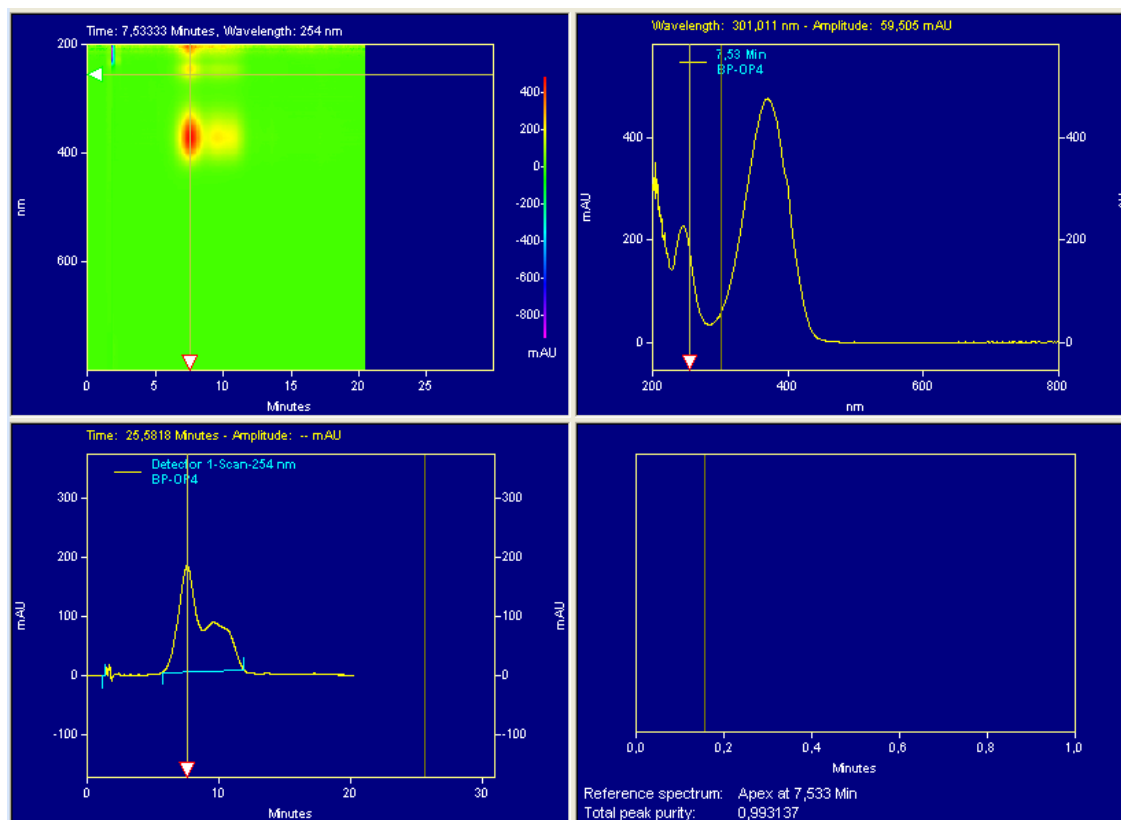

| Retention Time | Area     | Area % | Height | Height % |
|----------------|----------|--------|--------|----------|
| 1.183          | 6447     | 0.02   | 800    | 0.45     |
| 7.533          | 27309498 | 99.98  | 178260 | 99.55    |
| Totals         | 27315945 | 100.00 | 179060 | 100.00   |

Figure S86. HPLC chromatograms of compound 40.
